# Supplementary material for: Total synthesis of linear lipodepsipeptide kavaratamide A and its C25-epimer
Source: Royal Society of Chemistry journal article supplement (doi:10.1039/d4ob01970a), 2025-01-01
Supplement: d4ob01970a2.pdf [file d4ob01970a2.pdf]

## Supplementary Information

### Total synthesis of linear lipodepsipeptide kavaratamide A and its C25-epimer

Manas Ranjan Sahu,<sup>a</sup> Sudhir R. Ingale,<sup>a,b</sup> and Ravindar Kontham<sup>\*, a,b</sup>

<sup>a</sup>*Organic Chemistry Division, CSIR-National Chemical Laboratory, Dr. Homi Bhabha Road, Pune-411008, India.*

<sup>b</sup>*Academy of Scientific and Innovative Research (AcSIR), Ghaziabad-201002, India.*

<sup>\*</sup>*Corresponding Author,*

*E-mail:* [k.ravindar@ncl.res.in](mailto:k.ravindar@ncl.res.in); [konthamravindar@gmail.com](mailto:konthamravindar@gmail.com)

---

### Table of Contents

| S. No | Contents                                                                                     | Page No  |
|-------|----------------------------------------------------------------------------------------------|----------|
| 1)    | General Information                                                                          | S2       |
| 2)    | Experimental Procedures and Analytical Data                                                  | S3-S19   |
| 3)    | HPLC data                                                                                    | S20-S23  |
| 4)    | Cytotoxicity study of C25- <i>epi</i> -Kavaratamide A and Kavaratamide A in HepG2 Cell Line  | S24-S47  |
| 5)    | Cytotoxicity study of C25- <i>epi</i> -Kavaratamide A and Kavaratamide A in PANC-1 Cell Line | S48-S70  |
| 6)    | <sup>1</sup> H, <sup>13</sup> C and DEPT spectra                                             | S71-S110 |

**1) General Information:**

All reactions were performed under argon atmosphere with oven (80 °C) or flame-dried glassware with a septum seal. Tetrahydrofuran (THF) was distilled from sodium-benzophenone under the argon atmosphere immediately before use. Anhydrous dichloromethane, dichloroethane, methanol and fluorobenzene were purchased from commercial sources and used without any further treatment. Reaction temperatures are reported as the temperature of the bath surrounding the reaction vessel, and 30 °C corresponds to the room temperature (rt) of the laboratory when the experiments were carried out. Analytical thin-layer chromatography (TLC) was performed on TLC Silica gel 60 F254. Visualization was accomplished with short wave UV light, anisaldehyde or KMnO<sub>4</sub> staining solutions followed by heating. Chromatography was performed on silica gel (100-200 mesh) by standard techniques eluting with solvents as indicated. <sup>1</sup>H and <sup>13</sup>C NMR spectra were recorded on Bruker AV 200, 400, and 500 in solvents as indicated. Chemical shifts (δ) are given in ppm. The residual solvent signals were used as references and the chemical shifts converted to the TMS scale (CDCl<sub>3</sub>: δ H = 7.26 ppm, δ C = 77.16 ppm), the following abbreviations were used: s, singlet; d, doublet; t, triplet; q, quartet; m, multiplet; dd, doublet of doublet; td, triplet doublet; and br, broad. HRMS data were recorded on Q Exactive Hybrid™ Quadrupole-Orbitrap™ mass spectrometer (Thermo Scientific, TM Accela 1250 pump). Chiral HPLC separations were achieved using Shimadzu prominence-*i* LC-2030C 3D plus reverse phase HPLC unit and LabSolutions software with Kromasil C18 column (150 × 4.6 mm, 5 μm particle size). Experimental procedures for all new compounds and known compounds without published experimental procedures are described below. Compounds that are not presented in the main text of the manuscript are numbered starting from **S1**.

## 2. Experimental Procedures and Analytical Data:

### (*S*)-Undec-1-en-4-ol (**11**):

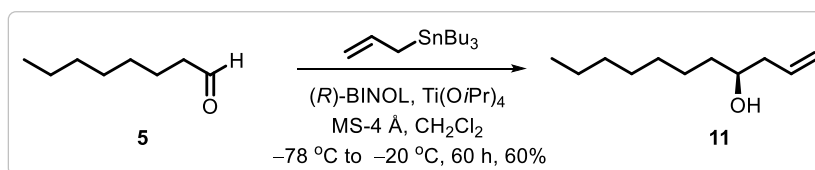

A 500 mL, round-bottom flask equipped with a stirring bar was charged with powdered 4 Å molecular sieves (100.0 g), (*R*)-BINOL (2.23 g, 7.79 mmol) and anhydrous dichloromethane (100 mL). To the resultant suspension was added titanium tetraisopropoxide (2.3 g, 1.13 mL, 7.79 mmol) by a syringe at room temperature. The resulting orange-red suspension was heated at reflux for 1 h. The red-brown mixture was cooled to ambient temperature and n-octanal (**5**) (5.0 g, 6.09 mL, 39.0 mmol) was added via syringe. The resulting mixture was stirred for 5 min at ambient temperature, then cooled to -78°C. To the reaction mixture slowly was added allyltributylstannane (15.49 g, 14.61 mL, 46.79 mmol) via syringe and continued to stir it at the same temperature for another 10 minutes. The resulting reaction mixture was then kept in a freezer at -20°C for 60 h without stirring. The reaction mixture was quenched with saturated aqueous sodium bicarbonate solution (100 mL), diluted with dichloromethane (100 mL), and stirred at ambient temperature for 3 h. The molecular sieves were removed by filtration through a pad of Celite, the residue was extracted thrice with dichloromethane. The combined organic layers were washed with water, dried over Na<sub>2</sub>SO<sub>4</sub>, and concentrated under reduced pressure. The resulting residue was purified by silica gel column chromatography (using 4% EtOAc in hexanes) (100-200 mesh), to afford (*S*)-Undec-1-en-4-ol (**11**) (4.0 g, 60 %) as a colourless oil. TLC:  $R_f$  = 0.5 (SiO<sub>2</sub>, 10% EtOAc/hexanes);  $[\alpha]_D^{25} = -7.6$  ( $c = 1.0$  in CHCl<sub>3</sub>); <sup>1</sup>H NMR (400 MHz, CDCl<sub>3</sub>): δ 5.87-5.77 (m, 1H), 5.15-5.07 (m, 2H), 3.62 (br. s., 1H), 2.33-2.23 (m, 1H), 2.18-2.07 (m, 1H), 1.69 (s, 1H), 1.44 (t,  $J = 5.6$  Hz, 2H), 1.37-1.24 (m, 10H), 0.87 (t,  $J = 7.13$  Hz, 3H); <sup>13</sup>C NMR (101 MHz, CDCl<sub>3</sub>): 135.1, 118.1, 70.8, 42.1, 36.9, 31.9, 29.7, 29.4, 25.8, 22.8, 14.2.

### (*S*)-*tert*-Butyldimethyl(undec-1-en-4-yloxy)silane (**12**):

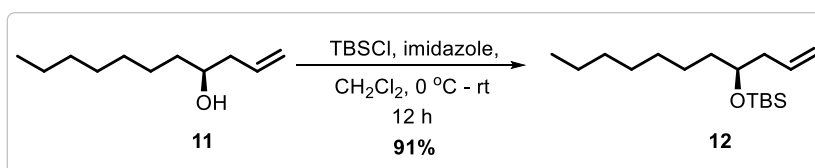

A 250 mL, round-bottom flask equipped with a stirring bar was charged (*S*)-Undec-1-en-4-ol (**11**) (4.0 g, 23.48 mmol) and anhydrous dichloromethane (50 mL) and cool it 0 °C. To the above-given solution was added imidazole (1.91 g, 28.18 mmol) in one portion at the same temperature. To the above cooled solution, TBSCl (4.2 g, 28.18 mmol) was added in small portions at 0 °C. After 10 minutes, temperature was increased to room temperature and continued the stirring for another 12 h. After the completion of the reaction, the reaction mixture was diluted with 100 ml of water and then the residue was extracted thrice with dichloromethane. The combined organic layers were washed with water, dried over Na<sub>2</sub>SO<sub>4</sub>, and concentrated under reduced pressure. The resulting residue was purified by silica gel column chromatography (using 100% hexanes) (100-200 mesh), to afford (*S*)-*tert*-Butyldimethyl(undec-1-en-4-yloxy)silane (**12**) (6.1 g, 91 %) as a colourless oil. TLC: *R*<sub>f</sub> = 0.7 (SiO<sub>2</sub>, 10% hexanes); [ $\alpha$ ]<sub>D</sub><sup>25</sup> = -34.2 (*c* = 1.0 in CHCl<sub>3</sub>); <sup>1</sup>H NMR (400 MHz, CDCl<sub>3</sub>):  $\delta$  5.89-5.75 (m, 1H), 5.07-4.99 (m, 2H), 3.68 (t, *J* = 5.4 Hz, 1H), 2.26-2.16 (m, 2H), 1.42 (br. s., 2H), 1.38-1.25 (m, 10H), 0.89 (s, 12H), 0.05 (s, 6H); <sup>13</sup>C NMR (101 MHz, CDCl<sub>3</sub>):  $\delta$  135.7, 116.7, 72.2, 42.1, 37.0, 32.0, 29.9, 29.5, 26.1, 25.5, 22.8, 18.3, 14.3, -4.2, -4.4.

**(*S*)-3-((*tert*-Butyldimethylsilyl)oxy)decanoic acid (**3**):**

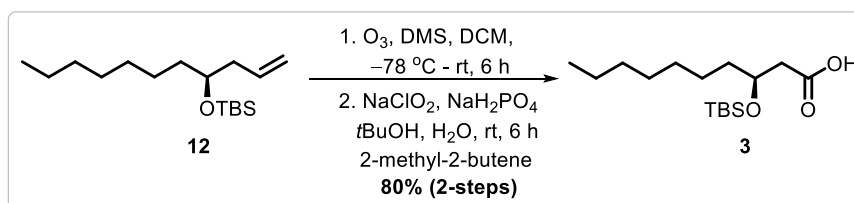

**STEP-1:** In a 250 mL, single necked round-bottom flask equipped with a stirring bar was charged with (*S*)-*tert*-Butyldimethyl(undec-1-en-4-yloxy)silane (**12**) (6.1 g, 21.43 mmol) and anhydrous dichloromethane (100 mL) and the given clear solution was cooled to -78°C. With the help of ozonizer machine first bubble O<sub>2</sub> gas into the solution for 5 minutes followed by continuous flow of O<sub>3</sub> until the reaction mixture turns blue. Once the solution becomes blue stop O<sub>3</sub> and replace residual O<sub>3</sub> with N<sub>2</sub> and quenched the reaction mixture with dimethyl sulphide. Slowly shift reaction mixture to ambient temperature and continue the stirring for another 3 h. On completion of the reaction dilute the residue with water (100 mL), the residue was extracted thrice with dichloromethane. The combined organic layers were washed with water, dried over Na<sub>2</sub>SO<sub>4</sub>, and concentrated and ultra-dried under reduced pressure. The resulting residue (aldehyde) was as it is forwarded for the next step without

further purification. TLC:  $R_f = 0.8$  (SiO<sub>2</sub>, 5% EtOAc/hexanes). (aldehyde = 5.8 g) as a colourless oil.

**STEP-2:** In a 250 mL, single necked round-bottom flask equipped with a stirring bar was charged with (*S*)-3-((*tert*-Butyldimethylsilyl)oxy)decanal (5.8 g, 20.24 mmol), tertiary butanol (10 mL), 2-methyl-2-butene (20 mL) and stir the given clear solution at ambient temperature. To the above solution was then added aqueous solution of NaClO<sub>2</sub> (18.30 g, 202.42 mmol) and NaH<sub>2</sub>PO<sub>4</sub> (14.48 g, 121.45 mmol) and continued the stirring for another 6 h at the same temperature. After completion of the reaction dilute the residue with water (100 mL), the residue was extracted with ethyl acetate (3×40 mL). The combined organic layers were washed with water, dried over Na<sub>2</sub>SO<sub>4</sub>, and concentrated under reduced pressure. The resulting residue was purified by silica gel column chromatography (using 4% EtOAc/hexanes) (100-200 mesh), to afford (*S*)-3-((*tert*-Butyldimethylsilyl)oxy)decanoic acid (**3**) (5.2 g, 80 %) as a colourless oil (over 2 steps); TLC:  $R_f = 0.4$  (SiO<sub>2</sub>, 10 % hexanes);  $[\alpha]_D^{25} = -91$  ( $c = 1.0$  in CHCl<sub>3</sub>); <sup>1</sup>H NMR (400 MHz, CDCl<sub>3</sub>):  $\delta$  4.11 (quin,  $J = 6.0$  Hz, 1H), 2.50-2.45 (m, 2H), 1.56-1.46 (m, 2H), 1.32-1.25 (m, 10H), 0.90-0.86 (m, 12H), 0.06 (d,  $J = 6.75$  Hz, 6H); <sup>13</sup>C NMR (101 MHz, CDCl<sub>3</sub>):  $\delta$  177.8, 69.5, 42.4, 37.6, 31.9, 29.7, 29.4, 25.9, 25.2, 22.8, 18.1, 14.2, -4.4, -4.7.

**(*R*)-Undec-1-en-4-ol (11'):**

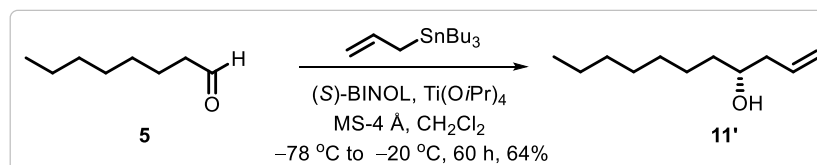

A 500-mL, round-bottom flask equipped with a stirring bar was charged with powdered 4 Å molecular sieves (100.0 g), (*S*)-BINOL (2.23 g, 7.79 mmol) and anhydrous methylene chloride (100 mL). To the resultant suspension was added titanium tetraisopropoxide (2.3 g, 1.13 mL, 7.79 mmol) by syringe at ambient temperature. The resulting orange red suspension was heated at reflux for 1 h. The red-brown mixture was cooled to ambient temperature and n-octanal (**5**) (5.0 g, 6.09 mL, 39.0 mmol) was injected via syringe. The resulting mixture was stirred for 5 min at ambient temperature, then cooled to -78°C. To the reaction mixture slowly was added allyltributylstannane (15.49 g, 14.61 mL, 46.79 mmol) via syringe and continued to stir it at the same temperature for another 10 minutes. The resulting reaction mixture was then kept in a freezer at -20°C for 60 h without

stirring. The reaction mixture was quenched with saturated aqueous sodium bicarbonate solution (100 mL), diluted with dichloromethane (100 mL), and stirred at ambient temperature for 3 h. The molecular sieves were removed by filtration through a pad of Celite, the residue was extracted thrice with dichloromethane. The combined organic layers were washed with water, dried over  $\text{Na}_2\text{SO}_4$ , and concentrated under reduced pressure. The resulting residue was purified by silica gel column chromatography (using 4% EtOAc in hexanes) (100-200 mesh), to afford (*R*)-Undec-1-en-4-ol (**11'**) (4.25 g, 64 %) as a colorless oil. TLC:  $R_f$  = 0.5 ( $\text{SiO}_2$ , 10% EtOAc/hexanes);  $[\alpha]_{\text{D}}^{25}$  = +7.66 ( $c$  = 1.0 in  $\text{CHCl}_3$ );  $^1\text{H}$  NMR (400 MHz,  $\text{CDCl}_3$ ):  $\delta$  5.87-5.77 (m, 1H), 5.15-5.07 (m, 2H), 3.62 (br. s., 1H), 2.33-2.23 (m, 1H), 2.18-2.07 (m, 1H), 1.69 (s, 1H), 1.44 (t,  $J$  = 5.6 Hz, 2H), 1.37-1.24 (m, 10H), 0.87 (t,  $J$  = 7.13 Hz, 3H);  $^{13}\text{C}$  NMR (101 MHz,  $\text{CDCl}_3$ ): 135.1, 118.1, 70.8, 42.1, 36.9, 31.9, 29.7, 29.4, 25.8, 22.8, 14.2.

**(*R*)-tert-Butyldimethyl(undec-1-en-4-yloxy)silane (**12'**):**

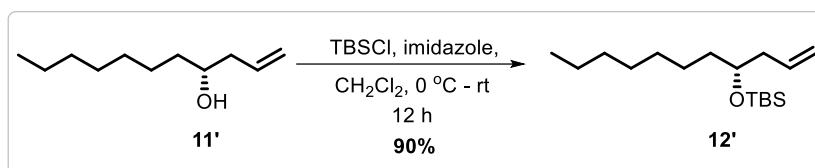

A 250 mL, round-bottom flask equipped with a stirring bar was charged (*R*)-Undec-1-en-4-ol (**11'**) (4.0 g, 23.48 mmol) and anhydrous dichloromethane (50 mL) and cool it 0 °C. To the above given solution was added imidazole (1.91 g, 28.18 mmol) in one portion at same temperature. To the above cooled solution, TBSCl (4.2 g, 28.18 mmol) was then added in small portions at 0 °C and then after 10 minutes temperature was increased to room temperature and continued the stirring for another 12 h. After the completion of the reaction, the reaction mixture was diluted with 100 ml of water and then the residue was extracted thrice with dichloromethane. The combined organic layers were washed with water, dried over  $\text{Na}_2\text{SO}_4$ , and concentrated under reduced pressure. The resulting residue was purified by silica gel column chromatography (using 100% hexanes) (100-200 mesh), to afford (*R*)-tert-Butyldimethyl(undec-1-en-4-yloxy)silane (**12'**) (6.0 g, 90 %) as a colourless oil. TLC:  $R_f$  = 0.7 ( $\text{SiO}_2$ , 100% hexanes);  $[\alpha]_{\text{D}}^{25}$  = +37.98 ( $c$  = 1.0 in  $\text{CHCl}_3$ );  $^1\text{H}$  NMR (400 MHz,  $\text{CDCl}_3$ ):  $\delta$  5.88-5.75 (m, 1H), 5.07-4.98 (m, 2H), 3.68 (quin,  $J$  = 5.75 Hz, 1H), 2.24-2.09 (m, 2H), 1.47-1.39 (m, 2H), 1.35-1.23 (m, 10H), 0.92-0.86 (m, 12H), 0.05 (s, 6H);  $^{13}\text{C}$  NMR (101

MHz, CDCl<sub>3</sub>):  $\delta$  135.7, 116.7, 72.2, 42.1, 37.0, 32.0, 29.9, 29.5, 26.1, 25.5, 22.8, 18.3, 14.3, -4.2, -4.4.

**(*R*)-3-((*tert*-Butyldimethylsilyl)oxy)decanoic acid (**3'**):**

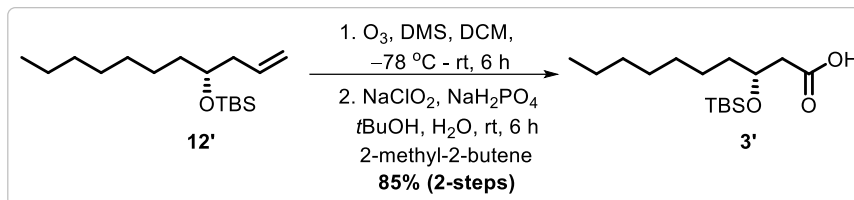

**STEP-1:** A 250 mL, single necked round-bottom flask equipped with a stirring bar was charged with (*R*)-*tert*-Butyldimethyl(undec-1-en-4-yloxy)silane (**12'**) (6.0 g, 21.08 mmol) and anhydrous dichloromethane (100 mL) and the given clear solution was cooled to -78°C. With the help of ozonizer machine first bubble O<sub>2</sub> gas in to the solution for 5 minutes followed by continuous flow of O<sub>3</sub> until the reaction mixture turns blue. Once the solution becomes blue stop O<sub>3</sub> and replace residual O<sub>3</sub> with N<sub>2</sub> and quenched the reaction mixture with dimethyl sulphide. Slowly shift reaction mixture to ambient temperature and continue stirring for another 3 h. On completion of the reaction dilute the residue with water (100 mL), the residue was extracted thrice with dichloromethane. The combined organic layers were washed with water, dried over Na<sub>2</sub>SO<sub>4</sub>, and concentrated and ultra dried under reduced pressure. The resulting residue (aldehyde) was as it is forwarded for the next step without further purification. TLC:  $R_f$  = 0.8 (SiO<sub>2</sub>, 5% EtOAc/hexanes). (aldehyde = 5.9 g) as a colourless oil.

**STEP-2:** In a 250 mL, single necked round-bottom flask equipped with a stirring bar was charged with (*R*)-3-((*tert*-Butyldimethylsilyl)oxy)decanal (5.9 g, 20.58 mmol, 1 equiv.), tertiary butanol (5 mL), 2-methyl-2-butene (15 mL) and stir the given clear solution at ambient temperature. To the above solution was then added aqueous solution of NaClO<sub>2</sub> (18.62 g, 205.89 mmol, 10 equiv.) and NaH<sub>2</sub>PO<sub>4</sub> (14.73 g, 123.54 mmol, 6 equiv.) and continued the stirring for another 6 h at the same temperature. On completion of the reaction dilute the residue with water (100 mL), the residue was extracted thrice with ethyl acetate. The combined organic layers were washed with water, dried over Na<sub>2</sub>SO<sub>4</sub>, and concentrated under reduced pressure. The resulting residue was purified by silica gel column chromatography (using 4% EtOAc/hexanes) (100-200 mesh), to afford (*R*)-3-((*tert*-Butyldimethylsilyl)oxy)decanoic acid (**3'**) (5.42 g, 85 %) as a colourless oil (over 2 steps); TLC:  $R_f$  = 0.4 (SiO<sub>2</sub>, 10 % hexanes);  $[\alpha]_D^{25}$  = + 0.94 ( $c$  = 1.0 in CHCl<sub>3</sub>); <sup>1</sup>H NMR (400

MHz, CDCl<sub>3</sub>):  $\delta$  4.11 (quin,  $J$  = 6.0 Hz, 1H), 2.50-2.45 (m, 2H), 1.55-1.47 (m, 2H), 1.37-1.24 (m, 11H), 0.91-0.85 (m, 12H), 0.06 (d,  $J$  = 6.88 Hz, 6H); <sup>13</sup>C NMR (101 MHz, CDCl<sub>3</sub>):  $\delta$  178.0, 69.5, 42.4, 37.6, 31.9, 29.7, 29.4, 25.9, 25.2, 22.8, 18.1, 14.2, -4.4, -4.7; HRMS (ESI)  $m/z$  [M+Na]<sup>+</sup> calcd for C<sub>16</sub>H<sub>34</sub>O<sub>3</sub>NaSiNa, 325.2169; Found 325.2162.

***Tert*-butyl (*S*)-2-isopropyl-3-methoxy-5-oxo-2,5-dihydro-1*H*-pyrrole-1-carboxylate (**14**):**

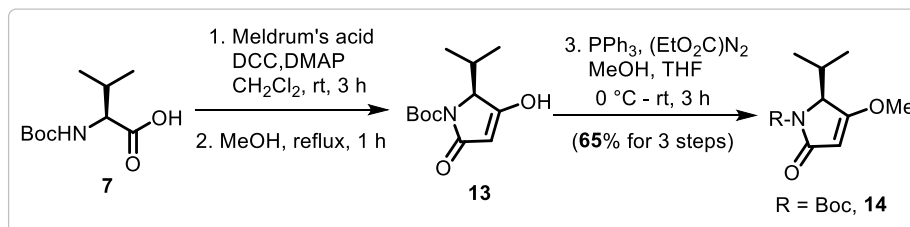

In a 250 mL two-necked round bottom flask, meldrum's acid (2.85 g, 19.8 mmol, 1.0 equiv.), DCC (4.9 g, 23.8 mmol, 1.2 equiv.), and DMAP (4.84 g, 39.6 mmol, 2.0 equiv.) were added to a solution of *N*-Boc-*L*-valine (**7**) (4.3 g, 19.8 mmol, 1.0 equiv.) in dry dichloromethane (44 mL). The mixture was stirred at room temperature for 3 h, and filtered. The filtrate was diluted with dichloromethane, transferred to a separatory funnel, and extracted. The combined organic phases were washed with 0.5 M HCl, H<sub>2</sub>O and brine, dried over anhydrous sodium sulphate, and concentrated under reduced pressure on a rotary evaporator. The residual oil was then refluxed in methanol (300 mL) for 1 h. The reaction mixture was concentrated on a rotary evaporator to afford the crude product **13**, which was submitted to the next step without further purification. Crude **13** (4.2 g, 17.4 mmol, 1.0 equiv.) was dissolved in dry tetrahydrofuran (85 mL) and the solution was cooled to 0 °C. Triphenylphosphine (5.93 g, 22.62 mmol, 1.3 equiv.), diethyl diazocarboxylate in toluene (3 mL, 19.14 mmol, 1.1 equiv.), and dry methanol (3.87 mL, 95.7 mmol, 5.5 equiv.) was added at 0 °C. The mixture was stirred for 30 min at 0 °C and 3 h at room temperature. After completion of the reaction, the crude reaction mixture was concentrated under reduced pressure on a rotary evaporator, and roughly purified by column chromatography (using 40% EtOAc/hexanes) (100-200 mesh), to afford *tert*-butyl (*S*)-2-Isopropyl-3-methoxy-5-oxo-2,5-dihydro-1*H*-pyrrole-1-carboxylate (**14**) (4.5 g, 90 %) over 3 steps as a yellow oil; TLC:  $R_f$  = 0.5 (SiO<sub>2</sub>, 40% EtOAc/hexanes); <sup>1</sup>H NMR (400 MHz, CDCl<sub>3</sub>)  $\delta$ : 5.05 (s, 1H), 4.35 (br. s., 1H), 3.80 (s, 3H), 2.44 (td,  $J$  = 7.00, 13.76 Hz, 1H), 1.52 (s, 9H), 1.08 (d,  $J$  = 7.13 Hz, 3H), 0.78 (d,  $J$  = 6.88 Hz, 3H); <sup>13</sup>C NMR (101 MHz, CDCl<sub>3</sub>)  $\delta$ : 178.0, 169.5, 149.7, 95.1, 82.6, 64.7, 58.4, 29.7, 28.3, 18.8, 15.6; HRMS (ESI)  $m/z$  [M+Na]<sup>+</sup> calcd for C<sub>13</sub>H<sub>21</sub>NO<sub>4</sub>Na, 278.1354; found 278.1363.



**(S)-5-Isopropyl-4-methoxy-1,5-dihydro-2H-pyrrol-2-one (10):**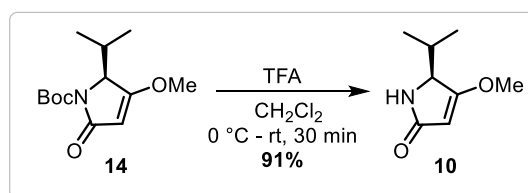

In a 250 mL, two necked round-bottom flask charged with stirring bar was added tert-butyl (*S*)-2-Isopropyl-3-methoxy-5-oxo-2,5-dihydro-1*H*-pyrrole-1-carboxylate (**14**) (4.5 g, 17.62 mmol, 1 equiv.) and dissolved it in anhydrous dichloromethane under the presence of nitrogen gas and stirred at 0 °C. To the above stirring solution was added TFA (40.19 g, 27.0 mL, 35.25 mmol, 20 equiv.) and after complete addition, the temperature was slowly increased to room temperature and continued for another 30 minutes. After completion of the reaction, the TFA was removed under reduced pressure and purified by column chromatography (5% MeOH/DCM) to afford (*S*)-5-Isopropyl-4-methoxy-1,5-dihydro-2*H*-pyrrol-2-one (**10**) (2.5 g, 91%) as a white solid; TLC:  $R_f$  = 0.2 (SiO<sub>2</sub>, 50% EtOAc/hexanes);  $[\alpha]_D^{25}$  = +8.47 ( $c$  = 1.0 in CHCl<sub>3</sub>); <sup>1</sup>H NMR (400 MHz, CDCl<sub>3</sub>)  $\delta$ : 6.52 (br. s., 1H), 5.01 (s, 1H), 3.98 (br. s., 1H), 3.77 (s, 3H), 2.07 (td,  $J$  = 3.25, 6.75 Hz, 1H), 1.01 (d,  $J$  = 6.88 Hz, 3H), 0.78 (d,  $J$  = 6.75 Hz, 3H); <sup>13</sup>C NMR (101 MHz, CDCl<sub>3</sub>)  $\delta$ : 177.8, 175.1, 94.4, 62.8, 58.3, 29.4, 19.5, 15.3; HRMS (ESI)  $m/z$  [M+H]<sup>+</sup> calcd for C<sub>8</sub>H<sub>14</sub>NO<sub>2</sub>, 156.1019; found 156.1018.

**Benzyl (*S*)-2-hydroxy-3-methylbutanoate (15):**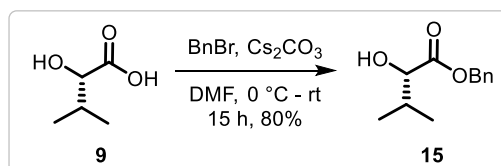

To a solution of (*S*)-2-Hydroxy-3-methylbutanoic acid (3.22 g, 27.3 mmol, 1 equiv.) in anhydrous *N,N*-dimethylformamide (20 mL) at 0 °C was added caesium carbonate (4.45 g, 13.7 mmol, 0.5 equiv.) and the resulting mixture was stirred for further 40 minutes at the same temperature. After that benzyl bromide (3.6 mL, 30.0 mmol, 1.1 equiv.) was added with a syringe to the above reaction mixture and then the stirring was further continued for another 15 h at room temperature. The reaction mixture was filtered and the filtrate was diluted with Hexane/ethyl acetate (4:1, 120 mL). The organic layer was washed with NH<sub>4</sub>Cl solution (100 mL), saturated NaHCO<sub>3</sub> solution (100 mL) and saturated NaCl solution (100 mL) before being dried over sodium sulphate and the solvent being removed under reduced pressure. The

resulting residue was purified by silica gel column chromatography (using 4% EtOAc/hexanes) (100-200 mesh), to afford Benzyl (*S*)-2-Hydroxy-3-methylbutanoate (**15**) (4.56 g, 21.9 mmol, 80%) as a colourless oil; TLC:  $R_f$  = 0.6 (SiO<sub>2</sub>, 10% EtOAc/hexanes);  $[\alpha]_D^{25}$  = -11.76 ( $c$  = 1.0 in CHCl<sub>3</sub>); <sup>1</sup>H NMR (400 MHz, CDCl<sub>3</sub>)  $\delta$ : 7.37 (br. s., 5H), 5.28-5.17 (m, 2H), 4.12-4.06 (m, 1H), 2.83 (d,  $J$  = 5.63 Hz, 1H), 2.16-2.05 (m, 1H), 1.02 (d,  $J$  = 6.88 Hz, 3H), 0.84 (d,  $J$  = 6.88 Hz, 3H); <sup>13</sup>C NMR (101 MHz, CDCl<sub>3</sub>)  $\delta$ : 174.9, 135.3, 128.7, 128.6, 128.5, 75.1, 67.3, 32.3, 18.9, 16.0; HRMS (ESI)  $m/z$  [M+Na]<sup>+</sup> calcd for C<sub>12</sub>H<sub>16</sub>O<sub>3</sub>Na, 231.0992; found 231.0990.

**Benzyl (*S*)-2-((*N*-(*tert*-butoxycarbonyl)-*N*-methyl-*L*-alanyl)oxy)-3-methylbutanoate (**16**):**

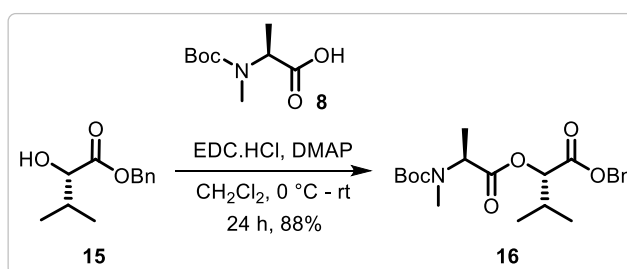

A 250 mL, two-necked round-bottom flask equipped with a stirring bar was charged with benzyl (*S*)-2-hydroxy-3-methyl butanoate (**15**) (4.56 g, 21.8 mmol, 1 equiv.), *N*-(*tert*-Butoxycarbonyl)-*N*-methyl-*L*-alanine (**8**) (6.23 g, 30.6 mmol, 1.4 equiv.), 4-DMAP (3.47 g, 28.4 mmol, 1.3 equiv.) and anhydrous dichloromethane (100 mL) and the given clear solution was cooled to 0 °C. To this above cooled clear solution was added slowly in portions EDC.HCl (6.29 g, 32.8 mmol, 1.5 equiv.) and then the stirring was continued at room temperature for another 24 h. After completion of the reaction, the crude reaction mixture was diluted with aqueous HCl (25 mL, 1M), and extracted with DCM (3×40 mL). The combined organic layers were washed with water, aqueous saturated NaHCO<sub>3</sub> solution, dried over Na<sub>2</sub>SO<sub>4</sub>, and concentrated under reduced pressure. The resulting residue was purified by silica gel column chromatography (using 3% EtOAc/hexanes) (100-200 mesh), to afford Benzyl (*S*)-2-((*N*-(*tert*-Butoxycarbonyl)-*N*-methyl-*L*-alanyl)oxy)-3-methylbutanoate (**16**) (7.58 g, 88%) as a colourless oil; TLC:  $R_f$  = 0.6 (SiO<sub>2</sub>, 10 % hexanes);  $[\alpha]_D^{25}$  = -41.18 ( $c$  = 1.0 in CHCl<sub>3</sub>); <sup>1</sup>H NMR (400 MHz, CDCl<sub>3</sub>) (Mixture of rotamers)  $\delta$ : 7.35 (br. s., 5H), 5.23 (d,  $J$  = 12.13 Hz, 1H), 5.12 (d,  $J$  = 11.63 Hz, 1H), 4.88 (br. s., 1.54H), 4.68-4.59 (d,  $J$  = 5.75 Hz, 0.47H), 2.89-2.76 (d,  $J$  = 26.14 Hz, 3H), 2.32-2.20 (m, 1H), 1.48-1.40 (m, 12H), 0.99 (d,  $J$  = 6.5 Hz, 3H), 0.94 (d,  $J$  = 6.38 Hz, 3H); <sup>13</sup>C NMR (101 MHz, CDCl<sub>3</sub>)  $\delta$ : 172.2, 169.4, 156.0, 155.3, 135.4, 128.7, 128.6, 128.5, 80.5, 80.1, 67.0, 54.8, 53.5, 31.0, 30.7, 30.2, 28.5,

19.0, 17.2, 15.2, 14.8; HRMS (ESI)  $m/z$   $[M+Na]^+$  calcd for  $C_{21}H_{31}NO_6Na$ , 416.2044; found 416.2036.

**(S)-2-((N-(*tert*-Butoxycarbonyl)-N-methyl-L-alanyl)oxy)-3-methylbutanoic acid (**17**):**

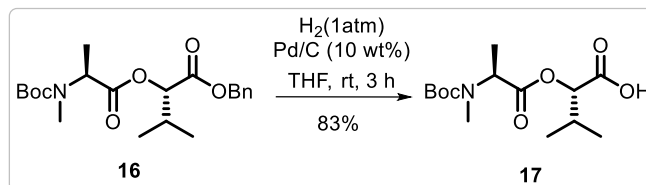

A 250 mL, single-necked round-bottom flask equipped with a stirring bar was charged with Benzyl (S)-2-((N-(*tert*-Butoxycarbonyl)-N-methyl-L-alanyl)oxy)-3-methylbutanoate (**16**) (7.58 g, 19.2 mmol, 1 equiv.) and anhydrous THF (80 mL). To this above clear solution was added 10% palladium on carbon (Pd/C) (~1.76 g) and then the reaction flask was purged with hydrogen gas for 20 minutes and further stirred at room temperature under a hydrogen atmosphere (1 atm.) for an additional 3 hr. After completion of the reaction, the crude reaction mixture was filtered through celite, washed with ethyl acetate (80 mL), and concentrated under reduced pressure, to afford (S)-2-((N-(*tert*-Butoxycarbonyl)-N-methyl-L-alanyl)oxy)-3-methylbutanoic acid (**17**) (4.9 g, 83%) as a colourless oil; TLC:  $R_f$  = 0.3 ( $SiO_2$ , 40 % EtOAc/hexane). The resulting residue was carried forward without further purification.

**4-Nitrophenyl (S)-2-((N-(*tert*-butoxycarbonyl)-N-methyl-L-alanyl)oxy)-3-methylbutanoate (**18**):**

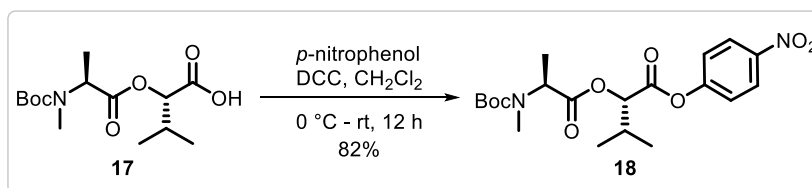

A 250 mL, two necked round-bottom flask equipped with stirring bar was added (S)-2-((N-(*tert*-butoxycarbonyl)-N-methyl-L-alanyl)oxy)-3-methylbutanoic acid (**17**) (4.9 g, 16.1 mmol, 1 equiv.) and dissolved it in anhydrous dichloromethane under the presence of nitrogen gas and stirred at 0 °C. To this above stirring, solution was added *p*-nitrophenol (2.47 g, 17.7 mmol, 1.1 equiv.) followed by small portion-wise addition of DCC (6.6 g, 32.3 mmol, 2 equiv.). After complete addition, the temperature was slowly increased to room

temperature and continued for another 12 h. After completion of the reaction, the reaction mixture was filtered through celite, transferred to a separatory funnel and extracted with dichloromethane. The combined organic layers were washed with water, aqueous saturated  $\text{NaHCO}_3$  solution, dried over  $\text{Na}_2\text{SO}_4$ , and concentrated under reduced pressure. The resulting residue was purified by silica gel column chromatography (using 12% EtOAc/hexanes) (100-200 mesh), to afford 4-Nitrophenyl (*S*)-2-((*N*-(*tert*-butoxycarbonyl)-*N*-methyl-*L*-alanyl)oxy)-3-methylbutanoate (**18**) (5.6 g, 82%) as a colourless oil; TLC:  $R_f$  = 0.6 ( $\text{SiO}_2$ , 15 % hexanes); in  $[\alpha]_{\text{D}}^{25} = -43.14$  ( $c = 1.0$  in  $\text{CHCl}_3$ );  $^1\text{H}$  NMR (400 MHz,  $\text{CDCl}_3$ ): (Mixture of rotamers)  $\delta$  8.26 (d,  $J = 8.25$  Hz, 2H), 7.27 (d,  $J = 8.76$  Hz, 2H), 4.96 (br. s., 1H), 4.87 (d,  $J = 6.13$  Hz, 0.5H), 4.6 (d,  $J = 5.13$  Hz, 0.5H), 2.86 (d,  $J = 20.14$  Hz, 3H), 2.41-2.38 (m, 1H), 1.49-1.39 (m, 12H), 1.10 (t,  $J = 7.0$  Hz, 6H);  $^{13}\text{C}$  NMR (101 MHz,  $\text{CDCl}_3$ ):  $\delta$  172.5, 167.6, 155.0, 145.8, 125.4, 122.5, 80.6, 80.4, 54.9, 53.8, 31.2, 31.1, 30.3, 28.5, 18.9, 17.5, 15.3, 14.8; HRMS (ESI)  $m/z$   $[\text{M}+\text{H}]^+$  calcd for  $\text{C}_{20}\text{H}_{29}\text{N}_2\text{O}_8$ , 425.1918; found 425.1906.

**(*S*)-1-((*S*)-2-Isopropyl-3-methoxy-5-oxo-2,5-dihydro-1*H*-pyrrol-1-yl)-3-methyl-1-oxobutan-2-yl *N*-(*tert*-butoxycarbonyl)-*N*-methyl-*L*-alaninate (**19**):**

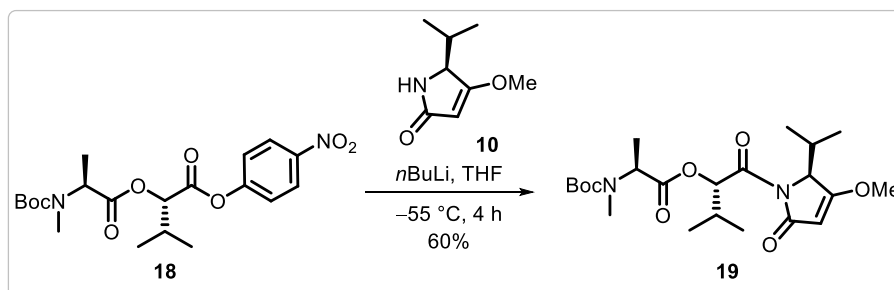

In a 250 mL, two-necked round-bottom flask charged with a stirring bar was added (*S*)-5-Isopropyl-4-methoxy-1,5-dihydro-2*H*-pyrrol-2-one (**10**) (1.7 g, 10.95 mmol, 1 equiv.) and dissolved it in anhydrous tetrahydrofuran under the presence of nitrogen gas and cooled it to  $-55^\circ\text{C}$ . To this above stirring solution was added slowly dropwise  $n\text{-BuLi}$  (10.2 mL, 1.6 M in hexanes, 16.4 mmol, 1.5 equiv.) over a time of 10 minutes, and continued the stirring for further 15 minutes. After 15 minutes of stirring to this resulting mixture was added a THF solution (10 mL) of 4-Nitrophenyl(*S*)-2-((*N*-(*tert*-butoxycarbonyl)-*N*-methyl-*L*-alanyl)oxy)-3-methylbutanoate (**18**) (5.56 g, 13.1 mmol, 1.2 equiv.) dropwise with a syringe over a time of 10 minutes and then continued the stirring for another 5 h. After completion of the reaction, the reaction mixture was quenched with an aqueous saturated  $\text{NH}_4\text{Cl}$  solution and the residue

was extracted with ethyl acetate (3×40 mL). The combined organic layers were washed with water, and brine solution, dried over Na<sub>2</sub>SO<sub>4</sub>, and concentrated under reduced pressure. The resulting residue was purified by silica gel column chromatography (using 21% EtOAc/hexanes) (100-200 mesh), to afford (*S*)-1-((*S*)-2-Isopropyl-3-methoxy-5-oxo-2,5-dihydro-1*H*-pyrrol-1-yl)-3-methyl-1-oxobutan-2-yl *N*-(*tert*-butoxycarbonyl)-*N*-methyl-*L*-alaninate (**19**) (2.9 g, 60%) as a colourless oil; TLC: *R*<sub>f</sub> = 0.5 (SiO<sub>2</sub>, 20% EtOAc/hexanes); in  $[\alpha]_{\text{D}}^{25} = -2.4$  (*c* = 1.0 in CHCl<sub>3</sub>); <sup>1</sup>H NMR (400 MHz, CDCl<sub>3</sub>): (Mixture of rotamers)  $\delta$  5.80 (d, *J* = 3.25 Hz, 1H), 5.07 (s, 1H), 4.50 (d, *J* = 2.75 Hz, 1H), 3.84 (s, 3H), 2.89-2.75 (d, *J* = 30.14 Hz, 3H), 2.65-2.56 (m, 1H), 2.26-2.18 (m, 1H), 1.45 (s, 9H), 1.42 (d, *J* = 7.25 Hz, 3H), 1.08 (d, *J* = 7.25 Hz, 3H), 1.06 (d, *J* = 6.88 Hz, 3H), 0.93 (d, *J* = 6.75 Hz, 3H), 0.78 (d, *J* = 6.88 Hz, 3H); <sup>13</sup>C NMR (101 MHz, CDCl<sub>3</sub>):  $\delta$  180.0, 172.1, 169.2, 94.7, 78.1, 4.4, 58.6, 29.0, 28.5, 19.9, 18.8, 16.1, 15.3; HRMS (ESI) *m/z* [M+Na]<sup>+</sup> calcd for C<sub>22</sub>H<sub>36</sub>N<sub>2</sub>O<sub>7</sub>Na, 463.2415; found 463.2401.

**(*S*)-1-((*S*)-2-Isopropyl-3-methoxy-5-oxo-2,5-dihydro-1*H*-pyrrol-1-yl)-3-methyl-1-oxobutan-2-yl *N*-((*tert*-butoxycarbonyl)-*L*-valyl)-*N*-methyl-*L*-alaninate (**20**):**

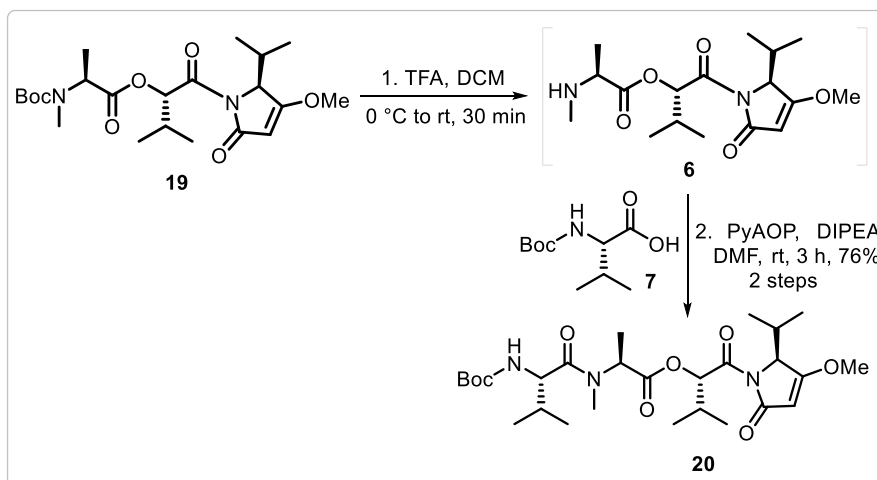

In a 100 mL, two necked round-bottom flask charged with stirring bar was added (*S*)-1-((*S*)-2-Isopropyl-3-methoxy-5-oxo-2,5-dihydro-1*H*-pyrrol-1-yl)-3-methyl-1-oxobutan-2-yl *N*-(*tert*-butoxycarbonyl)-*N*-methyl-*L*-alaninate (**19**) (2.9 g, 6.58 mmol, 1 equiv.) and dissolved it in anhydrous dichloromethane under the presence of nitrogen gas and stirred at 0 °C. To this above stirring solution was added TFA (7.5 g, 5.3 mL, 65.8 mmol, 15 equiv.) and after complete addition, the temperature was slowly increased to room temperature and continued for another 30 minutes. After completion of the reaction, the TFA was removed under reduced pressure to give crude (*S*)-1-((*S*)-2-Isopropyl-3-methoxy-5-oxo-2,5-dihydro-

1*H*-pyrrol-1-yl)-3-methyl-1-oxobutan-2-yl methyl-*L*-alaninate (**6**) which was submitted to the next step without work up and further purification.

In a 100 mL, two necked round-bottom flask charged with stirring bar was added *N*-Boc-*L*-valine (**7**) (1.85 g, 8.5 mmol, 1 equiv.), DIPEA (5.9 mL, 34.0 mmol, 4 equiv.), PyAOP (5.3 g, 10.2 mmol, 1.2 equiv.) and dissolved in anhydrous DMF (5.0 mL). The resultant mixture was stirred at rt for 2 minutes before the solution of crude (*S*)-1-((*S*)-2-isopropyl-3-methoxy-5-oxo-2,5-dihydro-1*H*-pyrrol-1-yl)-3-methyl-1-oxobutan-2-yl methyl-*L*-alaninate (**6**) (2.9 g, 8.5 mmol, 1 equiv.) in DCM (20 mL) was added dropwise with a syringe. The reaction mixture was allowed to stir at room temperature for 3 h. After completion of the reaction, crude reaction mixture was quenched with aqueous saturated NaHCO<sub>3</sub> solution, the residue was extracted with DCM (3×40 mL). The combined organic layers were washed with water, brine solution, dried over Na<sub>2</sub>SO<sub>4</sub>, and concentrated under reduced pressure. The resulting residue was purified by silica gel column chromatography (using 40% EtOAc/hexanes) (100-200 mesh), to afford (*S*)-1-((*S*)-2-Isopropyl-3-methoxy-5-oxo-2,5-dihydro-1*H*-pyrrol-1-yl)-3-methyl-1-oxobutan-2-yl *N*-((*tert*-butoxycarbonyl)-*L*-valyl)-*N*-methyl-*L*-alaninate (**20**) (2.7 g, 76%) as a white foam; TLC:  $R_f$  = 0.5 (SiO<sub>2</sub>, 40% EtOAc/hexanes); in  $[\alpha]_D^{25}$  = -6.66 ( $c$  = 1.0 in CHCl<sub>3</sub>); <sup>1</sup>H NMR (400 MHz, CDCl<sub>3</sub>):  $\delta$  5.80 (d,  $J$  = 3.13 Hz, 1H), 5.31-5.24 (m, 2H), 5.06 (s, 1H), 4.49 (d,  $J$  = 2.63 Hz, 1H), 3.84 (s, 3H), 3.02 (s, 3H), 2.62-2.53 (m, 1H), 2.27-2.17 (m, 1H), 2.04-1.94 (m, 1H), 1.45-1.40 (m, 12H), 1.08 (d,  $J$  = 7.25 Hz, 3H), 1.04 (d,  $J$  = 6.88 Hz, 3H), 0.99 (d,  $J$  = 6.88 Hz, 3H), 0.91 (d,  $J$  = 7.0 Hz, 3H), 0.88 (d,  $J$  = 6.75 Hz, 3H), 0.77 (d,  $J$  = 6.88 Hz, 3H); <sup>13</sup>C NMR (101 MHz, CDCl<sub>3</sub>):  $\delta$  180.0, 172.6, 171.3, 170.1, 169.2, 156.0, 94.7, 79.5, 78.3, 64.4, 58.7, 55.2, 52.7, 31.9, 31.5, 28.9, 28.5, 19.8, 19.7, 18.8, 17.2, 16.1, 15.3, 14.2; HRMS (ESI)  $m/z$  [M+H]<sup>+</sup> calcd for C<sub>27</sub>H<sub>46</sub>N<sub>3</sub>O<sub>8</sub>, 540.3279; found 540.3278.

**(*S*)-1-((*S*)-2-hydroxy-3-methylbutanoyl)-5-isopropyl-4-methoxy-1,5-dihydro-2*H*-pyrrol-2-one (**20a**):**

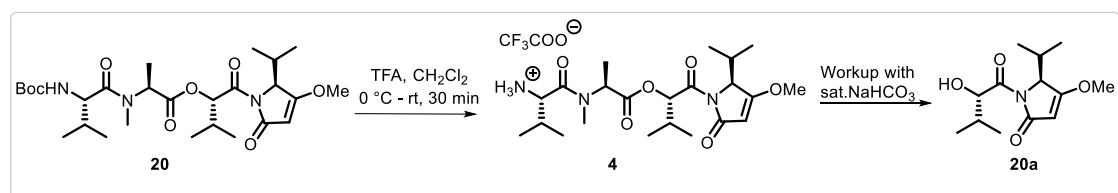

In a 25 mL, two necked round-bottom flask charged with stirring bar was added (*S*)-1-((*S*)-2-Isopropyl-3-methoxy-5-oxo-2,5-dihydro-1*H*-pyrrol-1-yl)-3-methyl-1-oxobutan-2-yl *N*-

((tert-butoxycarbonyl)-*L*-valyl)-*N*-methyl-*L*-alaninate (**20**) (0.2 g, 0.37 mmol, 1 equiv.) and dissolved it in anhydrous dichloromethane under the presence of nitrogen gas and stirred at 0 °C. To this above stirring solution was added TFA (1.0 mL) and after complete addition, the reaction mixture was stirred for another 30 minutes at room temperature. After completion of the reaction, the TFA was removed under reduced pressure to give crude TFA salt of (*S*)-1-((*S*)-2-Isopropyl-3-methoxy-5-oxo-2,5-dihydro-1*H*-pyrrol-1-yl)-3-methyl-1-oxobutan-2-yl *N*-(*L*-valyl)-*N*-methyl-*L*-alaninate (**4**) which was very unstable and after basic workup with NaHCO<sub>3</sub> afforded (*S*)-1-((*S*)-2-hydroxy-3-methylbutanoyl)-5-isopropyl-4-methoxy-1,5-dihydro-2*H*-pyrrol-2-one (**20a**); TLC:  $R_f$  = 0.6 (SiO<sub>2</sub>, 40% EtOAc/hexanes); in  $[\alpha]_D^{25}$  = -20.4 ( $c$  = 1.0 in CHCl<sub>3</sub>); <sup>1</sup>H NMR (400 MHz, CDCl<sub>3</sub>):  $\delta$  5.09 (s, 1H), 4.74 (dd,  $J$  = 3.88, 8.25 Hz, 1H), 4.53 (d,  $J$  = 2.63 Hz, 1H), 3.86 (s, 3H), 3.77 (d,  $J$  = 8.5 Hz, 1H), 2.71-2.63 (m, 1H), 2.15-2.06 (m, 1H), 1.12 (d,  $J$  = 7.13 Hz, 3H), 1.05 (d,  $J$  = 6.88 Hz, 3H), 0.85 (d,  $J$  = 6.88 Hz, 3H), 0.74 (d,  $J$  = 7.0 Hz, 3H); <sup>13</sup>C NMR (101 MHz, CDCl<sub>3</sub>):  $\delta$  180.4, 173.9, 170.8, 94.6, 76.2, 64.6, 58.8, 30.6, 28.8, 20.0, 18.9, 15.7, 15.4; HRMS (ESI)  $m/z$  [M+Na]<sup>+</sup> calcd for C<sub>13</sub>H<sub>20</sub>NO<sub>3</sub>, 238.1438; found 238.1436.

**(*S*)-1-((*S*)-2-Isopropyl-3-methoxy-5-oxo-2,5-dihydro-1*H*-pyrrol-1-yl)-3-methyl-1-oxobutan-2-yl *N*-(((*S*)-3-((*tert*-butyldimethylsilyl)oxy)decanoyl)-*L*-valyl)-*N*-methyl-*L*-alaninate (**21**):**

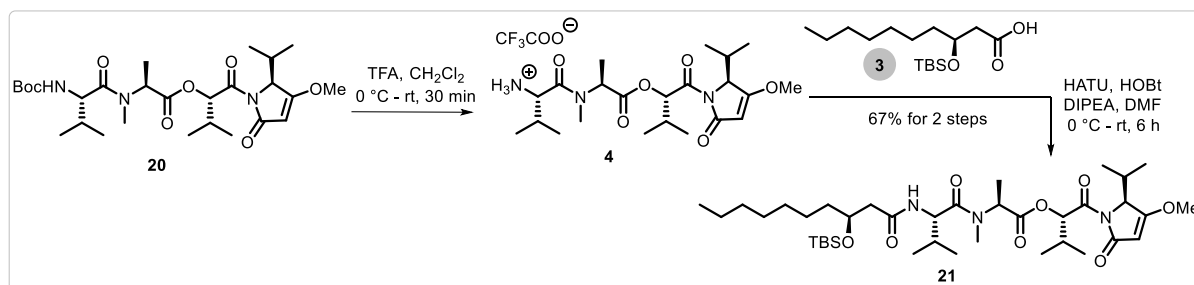

In a 25 mL, two necked round-bottom flask charged with stirring bar was added (*S*)-1-((*S*)-2-Isopropyl-3-methoxy-5-oxo-2,5-dihydro-1*H*-pyrrol-1-yl)-3-methyl-1-oxobutan-2-yl *N*-((tert-butoxycarbonyl)-*L*-valyl)-*N*-methyl-*L*-alaninate (**20**) (0.2 g, 0.37 mmol, 1 equiv.) and dissolved it in anhydrous dichloromethane under the presence of nitrogen gas and stirred at 0 °C. To this above stirring solution was added TFA (1.0 mL) and after complete addition, the reaction mixture was stirred for another 30 minutes at room temperature. After completion of the reaction, the TFA was removed under reduced pressure to give crude TFA salt of (*S*)-1-((*S*)-2-Isopropyl-3-methoxy-5-oxo-2,5-dihydro-1*H*-pyrrol-1-yl)-3-methyl-1-oxobutan-2-yl *N*-

(*L*-valyl)-*N*-methyl-*L*-alaninate (**4**) which was very unstable and hence it was submitted to the next step without work up and further purification.

In a 25 mL, two necked round-bottom flask charged with a stirring bar were added (*S*)-3-((*tert*-Butyldimethylsilyl)oxy)decanoic acid (**3**) (0.1 g, 0.33 mmol, 1 equiv.), HATU (0.15 g, 0.39 mmol, 1.2 equiv.), HOBt (0.53 g, 0.39 mmol, 1.2 equiv.), DIPEA (0.256 g, 0.34 mL, 1.9 mmol, 5 equiv.) in anhydrous DMF (1.0 mL). The resultant mixture was cooled to 0 °C and stirred for 10 minutes before the solution of crude TFA salt of (*S*)-1-((*S*)-2-Isopropyl-3-methoxy-5-oxo-2,5-dihydro-1*H*-pyrrol-1-yl)-3-methyl-1-oxobutan-2-yl *N*-(*L*-valyl)-*N*-methyl-*L*-alaninate (**4**) (0.174 g, 0.39 mmol, 1.2 equiv.) in DCM (4.0 mL) was added dropwise with a syringe. The reaction mixture was allowed to stir at room temperature for 6 h. After completion of the reaction, the crude reaction mixture was diluted with water, and aqueous saturated NH<sub>4</sub>Cl solution and the residue was extracted with DCM (3×10 mL). The combined organic layers were washed with water, and brine solution, dried over Na<sub>2</sub>SO<sub>4</sub>, and concentrated under reduced pressure. The resulting residue was purified by silica gel column chromatography (using 40% EtOAc/hexanes) (100-200 mesh), to afford (*S*)-1-((*S*)-2-Isopropyl-3-methoxy-5-oxo-2,5-dihydro-1*H*-pyrrol-1-yl)-3-methyl-1-oxobutan-2-yl *N*-(((*S*)-3-((*tert*-butyldimethylsilyl)oxy)decanoyl)-*L*-valyl)-*N*-methyl-*L*-alaninate (**21**) (0.18 g, 67%) as a colourless oil; TLC:  $R_f$  = 0.6 (SiO<sub>2</sub>, 40% EtOAc/hexanes); in  $[\alpha]_D^{25} = -7.78$  ( $c = 1.0$  in CHCl<sub>3</sub>); <sup>1</sup>H NMR (400 MHz, CDCl<sub>3</sub>):  $\delta$  6.68 (d,  $J = 8.76$  Hz, 1H), 5.81 (d,  $J = 3.35$  Hz, 1H), 5.39 (q,  $J = 7.25$  Hz, 1H), 5.06 (s, 1H), 4.84 (dd,  $J = 6.25, 8.76$  Hz, 1H), 4.49 (d,  $J = 2.75$  Hz, 1H), 4.06 (quin,  $J = 5.75$  Hz, 1H), 3.84 (s, 3H), 3.02 (s, 3H), 2.58 (dtd,  $J = 2.75, 7.0, 14.13$  Hz, 1H), 2.41 (dd,  $J = 5.0, 14.51$  Hz, 1H), 2.32 (dd,  $J = 5.63, 14.51$  Hz, 1H), 2.26-2.16 (m, 1H), 2.03 (qd,  $J = 6.75, 13.38$  Hz, 1H), 1.55-1.47 (m, 2H), 1.42 (d,  $J = 7.38$  Hz, 3H), 1.30-1.22 (m, 10H), 1.08 (d,  $J = 7.25$  Hz, 3H), 1.04 (d,  $J = 6.88$  Hz, 3H), 0.99 (d,  $J = 6.75$  Hz, 3H), 0.92 (dd,  $J = 1.63, 6.63$  Hz, 6H), 0.89-0.85 (m, 12H), 0.77 (d,  $J = 6.88$  Hz, 3H), 0.03 (s, 3H), 0.06 (s, 3H); <sup>13</sup>C NMR (101 MHz, CDCl<sub>3</sub>):  $\delta$  <sup>13</sup>C NMR (101MHz, CHLOROFORM-*d*)  $\delta$  = 180.0, 172.2, 171.3, 170.9, 170.1, 169.2, 94.4417, 78.4, 69.9, 64.4, 58.7, 53.6, 52.1, 44.3, 37.0, 31.9, 31.8, 31.6, 29.8, 29.3, 28.9, 28.5, 26.0, 25.6, 22.8, 19.8, 19.7, 18.8, 18.2, 17.9, 16.1, 15.3, 14.3, 14.2, -4.6, -4.6; HRMS (ESI)  $m/z$  [M+Na]<sup>+</sup> calcd for C<sub>38</sub>H<sub>69</sub>N<sub>3</sub>O<sub>8</sub>SiNa, 746.4746; found 746.4737.



**(*S*)-1-((*S*)-2-Isopropyl-3-methoxy-5-oxo-2,5-dihydro-1*H*-pyrrol-1-yl)-3-methyl-1-oxobutan-2-yl *N*-(((*S*)-3-hydroxydecanoyl)-*L*-valyl)-*N*-methyl-*L*-alaninate (1)**  
**(Kavaratamide A):**

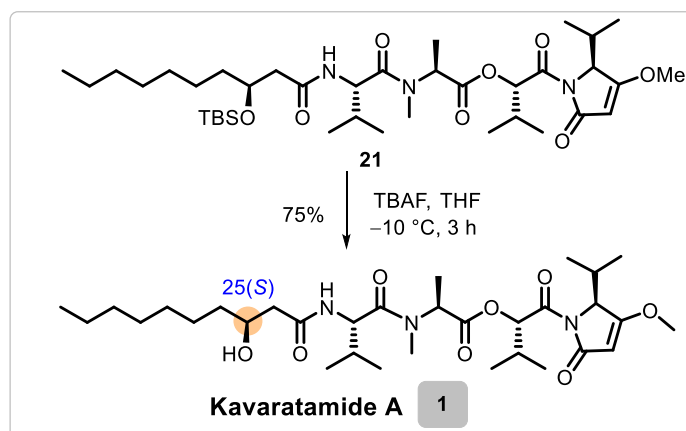

In a 10 mL, two necked round-bottom flask charged with stirring bar was added (*S*)-1-((*S*)-2-Isopropyl-3-methoxy-5-oxo-2,5-dihydro-1*H*-pyrrol-1-yl)-3-methyl-1-oxobutan-2-yl *N*-(((*S*)-3-((*tert*-butyldimethylsilyl)oxy)decanoyl)-*L*-valyl)-*N*-methyl-*L*-alaninate (**21**) (0.1 g, 0.13 mmol, 1 equiv.) in anhydrous tetrahydrofuran (1.0 mL) and the solution was cooled to -10 °C. At this temperature, TBAF (0.41 mL, 0.41 mmol, 1 M in THF, 3 equiv.) was added with a syringe and continued to stir for another 3 h at the same temperature. After completion of the reaction, the crude reaction mixture was diluted with water, aqueous saturated NH<sub>4</sub>Cl solution, and the residue was extracted ethyl acetate (3×10 mL). The combined organic layers were washed with water, and brine solution, dried over Na<sub>2</sub>SO<sub>4</sub>, and concentrated under reduced pressure. The resulting residue was purified by silica gel column chromatography (using 60% EtOAc/hexanes) (100-200 mesh), to afford Kavaratamide A (**1**) (0.063 g, 75%) as a colourless oil; TLC: *R*<sub>f</sub> = 0.4 (SiO<sub>2</sub>, 100% EtOAc); [ $\alpha$ ]<sub>D</sub><sup>25</sup> = -25.46 (*c* = 1.0 in MeOH); <sup>1</sup>H NMR (400 MHz, CDCl<sub>3</sub>)  $\delta$ : 6.59 (d, *J* = 8.8 Hz, 1H), 5.80 (d, *J* = 3.3 Hz, 1H), 5.27 (q, *J* = 7.34 Hz, 1H), 5.07 (s, 1H), 4.82 (dd, *J* = 5.75, 8.8 Hz, 1H), 4.48 (d, *J* = 2.69 Hz, 1H), 3.94 (br. s., 1H), 3.84 (s, 3H), 3.03 (s, 3H), 2.57 (dtd, *J* = 2.69, 6.97, 14.06 Hz, 1H), 2.37 (dd, *J* = 2.69, 15.04 Hz, 1H), 2.31-2.24 (m, 1H), 2.24-2.17 (m, 1H), 2.10-1.99 (m, 1H), 1.56-1.47 (m, 1H), 1.44 (d, *J* = 7.21 Hz, 3H), 1.42-1.37 (m, 1H), 1.26 (m, 10H), 1.07 (d, *J* = 7.21 Hz, 3H), 1.03 (d, *J* = 6.85 Hz, 3H), 0.99 (d, *J* = 6.72 Hz, 3H), 0.91 (d, *J* = 6.85 Hz, 3H), 0.89 (d, *J* = 6.72 Hz, 3H), 0.86 (t, *J* = 6.97, 3H), 0.76 (d, *J* = 6.85 Hz, 3H); <sup>13</sup>C NMR (101 MHz, CDCl<sub>3</sub>):  $\delta$  180.0, 172.9, 172.3, 171.1, 170.2, 169.1, 94.7, 78.4, 68.9, 64.3, 58.7, 53.9, 52.7, 42.9, 37.1, 31.9, 31.9, 31.2, 29.6, 29.4, 28.9, 28.4, 25.6, 22.8, 19.8, 19.7, 18.8, 17.5, 16.1, 15.3, 14.2, 14.2; IR (cm<sup>-1</sup>): 3314, 2925, 2860, 1728, 1624, 1530, 1457, 1381, 1314, 1250, 1190, 1124,

1083, 996, 934, 813, 744, 644; HRMS (ESI)  $m/z$   $[M+H]^+$  calcd for  $C_{32}H_{56}N_3O_8$ , 610.4062; found 610.4055 and HRMS (ESI)  $m/z$   $[M+Na]^+$  calcd for  $C_{32}H_{56}N_3O_8Na$ , 632.3881; found 632.6866.

**(S)-1-((S)-2-isopropyl-3-methoxy-5-oxo-2,5-dihydro-1H-pyrrol-1-yl)-3-methyl-1-oxobutan-2-yl N-(((R)-3-((tert-butyldimethylsilyl)oxy)decanoyl)-L-valyl)-N-methyl-L-alaninate (21')**

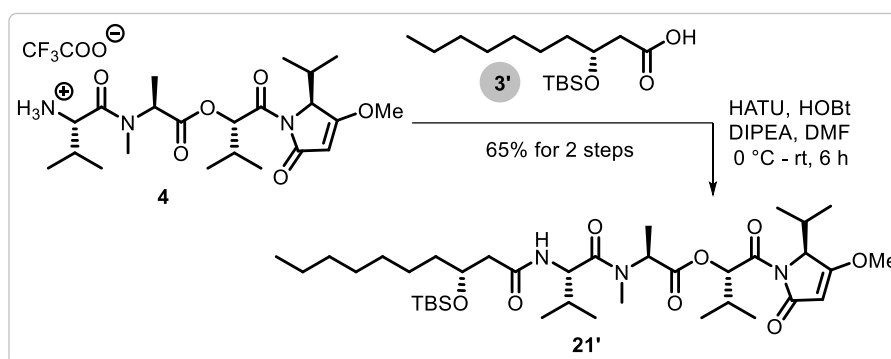

In a 25 mL, two necked round-bottom flask charged with a stirring bar were added (R)-3-((tert-Butyldimethylsilyl)oxy)decanoic acid (**3'**) (0.1 g, 0.33 mmol, 1 equiv.), HATU (0.15 g, 0.39 mmol, 1.2 equiv.), HOBT (0.53 g, 0.39 mmol, 1.2 equiv.), DIPEA (0.256 g, 0.34 mL, 1.9 mmol, 5 equiv.) in anhydrous DMF (1.0 mL). The resultant mixture was cooled to 0 °C and stirred for 10 minutes before the solution of crude TFA salt of (S)-1-((S)-2-Isopropyl-3-methoxy-5-oxo-2,5-dihydro-1H-pyrrol-1-yl)-3-methyl-1-oxobutan-2-yl N-(L-valyl)-N-methyl-L-alaninate (**4**) (0.174 g, 0.39 mmol, 1.2 equiv.) in DCM (2.0 mL) was added dropwise with a syringe. The reaction mixture was allowed to stir at room temperature for 6 h. After completion of the reaction, crude reaction mixture was diluted with water, quenched with aqueous saturated  $NH_4Cl$  solution, the residue was extracted with ethyl acetate (3×40 mL). The combined organic layers were washed with water, brine solution, dried over  $Na_2SO_4$ , and concentrated under reduced pressure. The resulting residue was purified by silica gel column chromatography (using 15% EtOAc/hexanes) (100-200 mesh), to afford (S)-1-((S)-2-isopropyl-3-methoxy-5-oxo-2,5-dihydro-1H-pyrrol-1-yl)-3-methyl-1-oxobutan-2-yl N-(((R)-3-((tert-Butyldimethylsilyl)oxy)decanoyl)-L-valyl)-N-methyl-L-alaninate: (**21'**) (0.175 g, 65%) as a colourless oil; TLC:  $R_f$  = 0.6 ( $SiO_2$ , 40% EtOAc/hexanes);  $[\alpha]_D^{21} = -7.3$  ( $c = 1.0$  in  $CHCl_3$ );  $^1H$  NMR (400 MHz,  $CDCl_3$ ):  $\delta$  6.73 (d,  $J = 9.01$  Hz, 1H), 5.81 (d,  $J = 3.25$  Hz, 1H), 5.41 (q,  $J = 7.25$  Hz, 1H), 5.06 (s, 1H), 4.78 (dd,  $J = 7.0, 9.01$  Hz, 1H), 4.49 (d,  $J = 2.63$  Hz, 1H), 4.04 (quin,  $J = 5.63$  Hz, 1H), 3.84 (s, 3H), 3.03 (s, 3H), 2.63-2.52 (m, 1H), 2.47-2.39 (m, 1H), 2.37-2.28 (m, 1H), 2.28-2.15 (m, 1H), 2.07-1.97 (m, 1H), 1.51-1.44 (m,

2H), 1.41 (d,  $J = 7.25$  Hz, 3H), 1.30-1.23 (m, 10H), 1.08 (d,  $J = 7.25$  Hz, 3H), 1.04 (d,  $J = 6.88$  Hz, 3H), 0.98 (d,  $J = 6.75$  Hz, 3H), 0.92-0.86 (m, 18H), 0.77 (d,  $J = 6.88$  Hz, 3H), 0.07 (d,  $J = 4.38$  Hz, 6H);  $^{13}\text{C}$  NMR (101 MHz,  $\text{CDCl}_3$ ):  $\delta$  180.0, 172.3, 171.3, 171.1, 170.1, 169.1, 94.7, 78.4, 69.8, 64.4, 58.7, 53.8, 52.1, 44.0, 36.8, 31.9, 31.6, 31.4, 29.7, 29.3, 28.9, 28.5, 26.0, 25.7, 22.8, 19.8, 19.6, 18.8, 18.1, 18.1, 16.1, 15.3, 14.4, 14.2, -4.5, -4.5; HRMS (ESI)  $m/z$   $[\text{M}+\text{H}]^+$  calcd for  $\text{C}_{38}\text{H}_{70}\text{N}_3\text{O}_8\text{Si}$ , 724.4927; found 724.4920.

**(S)-1-((S)-2-isopropyl-3-methoxy-5-oxo-2,5-dihydro-1H-pyrrol-1-yl)-3-methyl-1-oxobutan-2-yl N-(((R)-3-hydroxydecanoyl)-L-valyl)-N-methyl-L-alaninate (2) (C25-*epi*-Kavaratamoide A):**

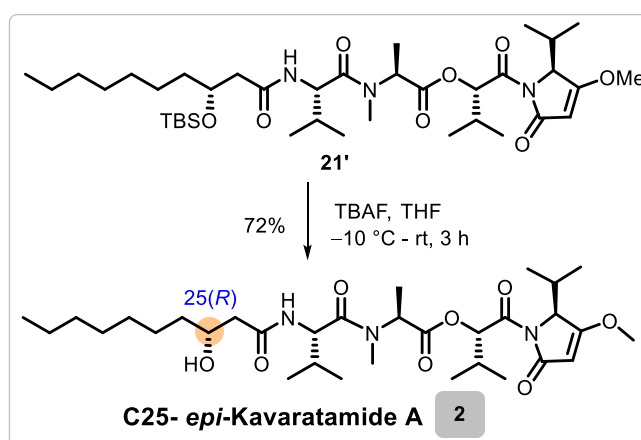

In a 50 mL, two necked round-bottom flask charged with stirring bar was added (S)-1-((S)-2-isopropyl-3-methoxy-5-oxo-2,5-dihydro-1H-pyrrol-1-yl)-3-methyl-1-oxobutan-2-yl N-(((R)-3-((*tert*-Butyldimethylsilyl)oxy)decanoyl)-L-valyl)-N-methyl-L-alaninate (**21'**) (0.1 g, 0.13 mmol, 1 equiv.), it dissolved in anhydrous tetrahydrofuran (1.0 mL) and the resultant solution was cooled to  $-10\text{ }^\circ\text{C}$ . At this temperature TBAF (0.41 mL, 0.41 mmol, 3 equiv.) (1 M in THF) with a syringe and continued the stirring for another 3 h at the same temperature. After completion of the reaction, the crude reaction mixture was diluted with water, and quenched with aqueous saturated  $\text{NH}_4\text{Cl}$  solution. The residue was extracted with ethyl acetate ( $3 \times 10$  mL). The combined organic layers were washed with water, and brine solution, dried over  $\text{Na}_2\text{SO}_4$ , and concentrated under reduced pressure. The resulting residue was purified by silica gel column chromatography (using 60% EtOAc/hexanes) (100-200 mesh), to afford C25-*epi*-Kavaratamide (**2**) (0.061 g, 72%) as a colourless oil; TLC:  $R_f = 0.4$  ( $\text{SiO}_2$ , 100% EtOAc); in  $[\alpha]_{\text{D}}^{25} = -30.74$  ( $c = 1.0$  in MeOH);  $^1\text{H}$  NMR (400 MHz,  $\text{CDCl}_3$ )  $\delta$ : 6.53 (d,  $J = 8.63$  Hz, 1H), 5.81 (br. s., 1H), 5.25 (q,  $J = 7.25$  Hz, 1H), 5.07 (s, 1H), 4.90-4.82 (m, 1H), 4.49 (br. s., 1H), 3.94 (br. s., 1H), 3.84 (s, 3H), 3.76 (br. s., 1H), 3.04 (s, 3H), 2.63-2.52

(m, 1H), 2.44-2.36 (m, 1H), 2.36-2.28 (m, 1H), 2.25-2.16 (m, 1H), 2.04 (dd,  $J = 6.1, 12.4$  Hz, 1H), 1.56-1.48 (m, 1H), 1.44 (d,  $J = 7.13$  Hz, 3H), 1.42-1.39 (m, 1H), 1.27 (br. s., 10H), 1.08 (d,  $J = 7.0$  Hz, 3H), 1.04 (d,  $J = 6.38$  Hz, 3H), 0.99 (d,  $J = 6.38$  Hz, 3H), 0.92-0.85 (m, 9H), 0.77 (d,  $J = 6.63$  Hz, 3H);  $^{13}\text{C}$  NMR (101 MHz,  $\text{CDCl}_3$ )  $\delta$ : 180.0, 172.6, 172.1, 171.1, 170.2, 169.1, 94.7, 78.4, 68.7, 64.4, 58.7, 53.6, 52.8, 42.4, 36.9, 32.0, 31.9, 31.5, 29.7, 29.4, 28.9, 28.5, 25.7, 22.8, 19.8, 19.7, 18.8, 17.5, 16.1, 15.3, 14.2, 14.2; IR ( $\text{cm}^{-1}$ ): 3423, 3313, 2962, 2928, 2874, 2855, 1726, 1695, 1619, 1532, 1463, 1385, 1339, 1317, 1298, 1248, 1202, 1184, 1121, 1088, 993, 938, 808, 750, 718, 644; HRMS (ESI)  $m/z$   $[\text{M}+\text{H}]^+$  calcd for  $\text{C}_{32}\text{H}_{56}\text{N}_3\text{O}_8$ , 610.4062; found 610.4045

**3. HPLC data:****Kavaratamide A (1):****<Chromatogram>**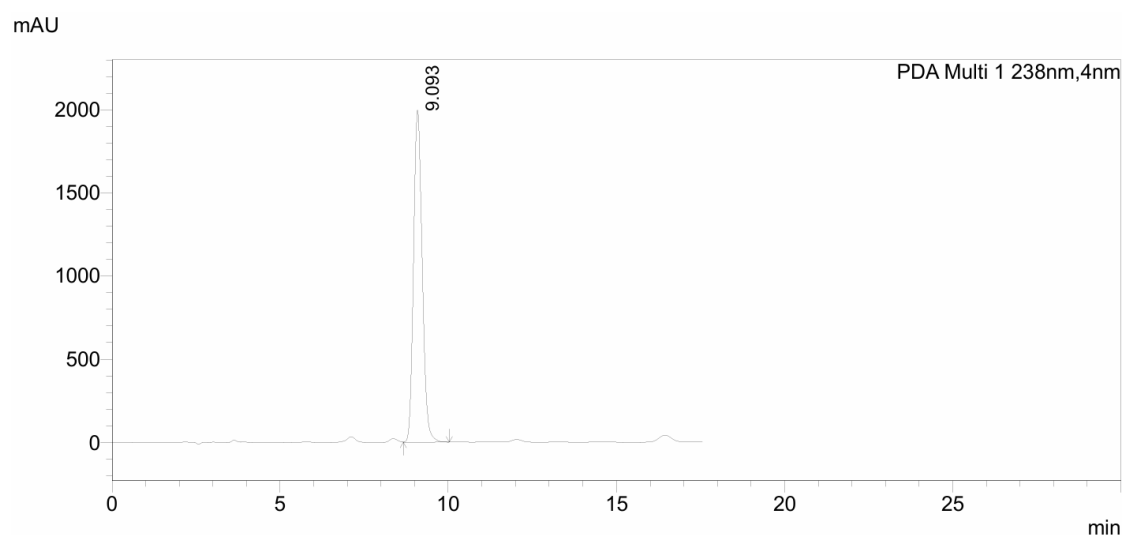**<Peak Table>**

PDA Ch1 238nm

| Ret. Time | Area     | Area%   | Height% |
|-----------|----------|---------|---------|
| 9.093     | 35832322 | 100.000 | 100.000 |
|           | 35832322 |         |         |

**Column:** Kromasil C18 column (150 × 4.6 mm, 5 µm particle size)**UV:** 238 nm,**Mobile phase:** with 78% MeCN in H<sub>2</sub>O containing 0.1% formic acid**Flow rate:** 0.6 mL/min

**C25-*epi*-Kavaratamide A (2):****<Chromatogram>**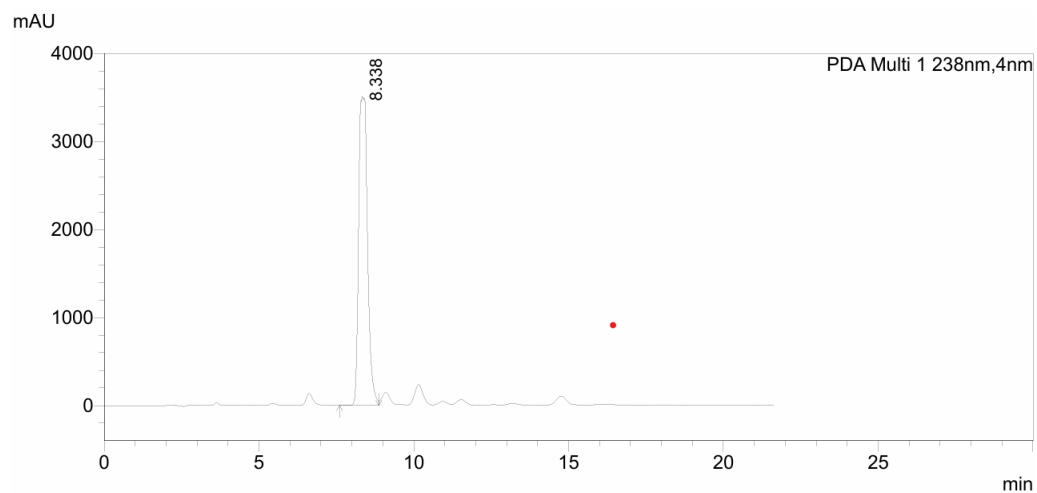**<Peak Table>**

PDA Ch1 238nm

| Ret. Time | Area     | Area%   | Height% |
|-----------|----------|---------|---------|
| 8.338     | 69868512 | 100.000 | 100.000 |
|           | 69868512 |         |         |

**Column:** Kromasil C18 column (150 × 4.6 mm, 5 μm particle size)**UV:** 238 nm,**Mobile phase:** with 78% MeCN in H<sub>2</sub>O containing 0.1% formic acid**Flow rate:** 0.6 mL/min

**Co-injection of 1 and 2 (2:1 = 6.5:3.5):****<Chromatogram>**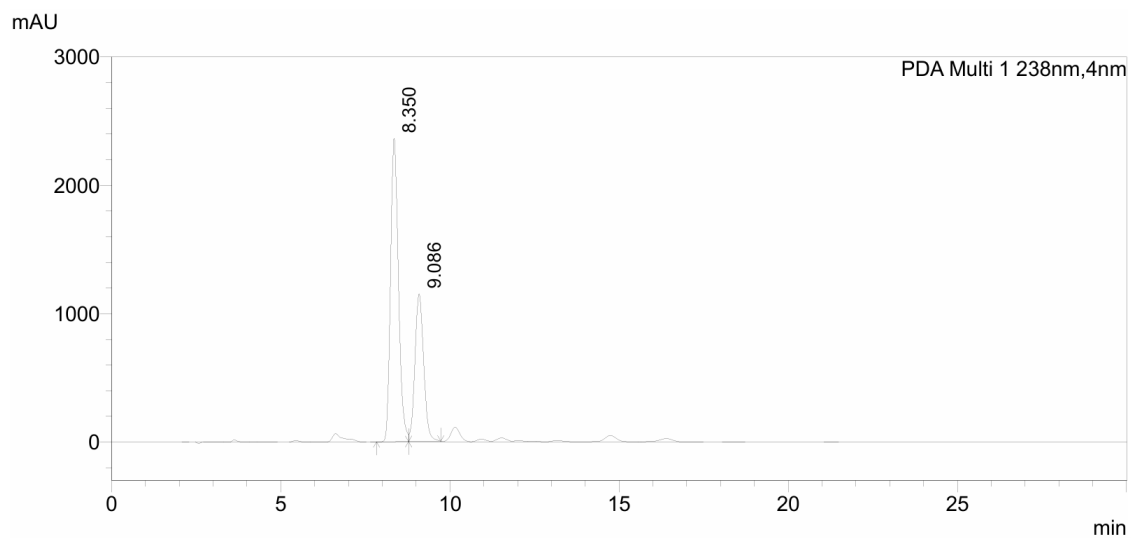**<Peak Table>**

PDA Ch1 238nm

| Ret. Time | Area     | Area%  | Height% |
|-----------|----------|--------|---------|
| 8.350     | 38314983 | 65.025 | 67.262  |
| 9.086     | 20608779 | 34.975 | 32.738  |
|           | 58923762 |        |         |

**Column:** Kromasil C18 column (150 × 4.6 mm, 5 µm particle size)**UV:** 238 nm,**Mobile phase:** with 78% MeCN in H<sub>2</sub>O containing 0.1% formic acid**Flow rate:** 0.6 mL/min

|                                                                                  |                                                 |                             |
|----------------------------------------------------------------------------------|-------------------------------------------------|-----------------------------|
|  | <b>ASTER ANALYTICS RESEARCH INSTITUTE, PUNE</b> |                             |
| <b>CELL LINE STUDY</b>                                                           |                                                 |                             |
| <b>Report No.</b>                                                                | AARI/IVCL/01/2024-25                            |                             |
| <b>Version No.</b>                                                               | 01                                              | <b>RESTRICTED DOCUMENTS</b> |
| <b>Cell Line Study</b>                                                           |                                                 |                             |

#### **4. Report On**

**“Cytotoxicity study of C25 Epi-Kavaratamide A and Kavaratamide A in HepG2 Cell Line”**

#### **REPORT NUMBER**

**AARI/IVCL/01/2024-25**

#### **PREPARED & APPROVED BY**

**ASTER ANALYTICS RESEARCH INSTITUTE**

**227, SRP ROAD, PANDAVNAGAR, WADACHI WADI, PUNE-411060**

#### **SPONSORED BY**

**DR. RAVINDAR KONTHAM**

**PRINCIPAL SCIENTIST**

**CSIR-NATIONAL CHEMICAL LABORATORY**

**DATE OF ISSUE OF REPORT: 02.01.2025**

**DATE OF RELEASE OF REPORT: 02.01.2025**

**This report contains 24 pages.**



|                                                                                  |                                                 |                             |
|----------------------------------------------------------------------------------|-------------------------------------------------|-----------------------------|
|  | <b>ASTER ANALYTICS RESEARCH INSTITUTE, PUNE</b> |                             |
| <b>CELL LINE STUDY</b>                                                           |                                                 |                             |
| <b>Report No.</b>                                                                | AARI/IVCL/01/2024-25                            |                             |
| <b>Version No.</b>                                                               | 01                                              | <b>RESTRICTED DOCUMENTS</b> |
| <b>Cell Line Study</b>                                                           |                                                 |                             |

## CONTENTS

| <b>Sr. No</b> | <b>Description</b>                   | <b>Page Number</b> |
|---------------|--------------------------------------|--------------------|
| <b>1.</b>     | Study Details                        | <b>S26</b>         |
| <b>2.</b>     | Compliance statement                 | <b>S27</b>         |
| <b>3.</b>     | Quality Assurance Statement          | <b>S28</b>         |
| <b>4.</b>     | Document Control                     | <b>S29</b>         |
| <b>5.</b>     | Objective                            | <b>S29</b>         |
| <b>6.</b>     | Study Guidelines                     | <b>S29</b>         |
| <b>7.</b>     | Study Period                         | <b>S29</b>         |
| <b>8.</b>     | Materials                            | <b>S29</b>         |
| <b>9.</b>     | Experimental Procedures              | <b>S29</b>         |
| <b>10.</b>    | MTT Assay                            | <b>S30</b>         |
| <b>11.</b>    | Observation and Results              | <b>S31</b>         |
| <b>12.</b>    | Data Analysis and Report Preparation | <b>S47</b>         |
| <b>13.</b>    | Archives                             | <b>S47</b>         |
| <b>14.</b>    | Study Plan Amendment and Deviations  | <b>S47</b>         |

|                                                                                   |                                                 |                             |
|-----------------------------------------------------------------------------------|-------------------------------------------------|-----------------------------|
|  | <b>ASTER ANALYTICS RESEARCH INSTITUTE, PUNE</b> |                             |
| <b>CELL LINE STUDY</b>                                                            |                                                 |                             |
| <b>Report No.</b>                                                                 | AARI/IVCL/01/2024-25                            |                             |
| <b>Version No.</b>                                                                | 01                                              | <b>RESTRICTED DOCUMENTS</b> |
| <b>Cell Line Study</b>                                                            |                                                 |                             |

### STUDY DETAILS

|                       |   |                                                                                                |
|-----------------------|---|------------------------------------------------------------------------------------------------|
| <b>Report Number</b>  | : | AARI/IVCL/01/2024-25                                                                           |
| <b>Study Title</b>    | : | Cytotoxicity study of C25 Epi-Kavaratamide A and Kavaratamide A in HepG2 Cell Line             |
| <b>Sponsor</b>        | : | Dr. Ravindar Kontham<br>Principal Scientist<br>CSIR-National Chemical Laboratory               |
| <b>Test Facility</b>  | : | Aster Analytics Research Institute<br>227, SRP Road, Pandavnagar,<br>Wadachi Wadi, Pune-411060 |
| <b>Study Director</b> | : | Dr. Amit Kasabe                                                                                |
| <b>Study personal</b> | : | Ms. Karishma Markad                                                                            |
| <b>Period</b>         | : | 30.12.2024 to 02.01.2025                                                                       |

|                                                                                  |                                                 |                             |
|----------------------------------------------------------------------------------|-------------------------------------------------|-----------------------------|
|  | <b>ASTER ANALYTICS RESEARCH INSTITUTE, PUNE</b> |                             |
| <b>CELL LINE STUDY</b>                                                           |                                                 |                             |
| <b>Report No.</b>                                                                | AARI/IVCL/01/2024-25                            |                             |
| <b>Version No.</b>                                                               | 01                                              | <b>RESTRICTED DOCUMENTS</b> |
| <b>Cell Line Study</b>                                                           |                                                 |                             |

### COMPLIANCE STATEMENT

I, the Undersigned hereby state and declare that this, “Report No. AARI/IVCL/01/2024-25” was performed under my supervision in compliance with the ICH guidelines.

Characterization of the “Test Items/Samples” was performed by the sponsor. Test Laboratory is responsible for validity of the test procedure, interpretation, analysis, documentation and test reports.

**Dr. Amit Kasabe**  
**Director**

**Date:** 02.01.2025

|                                                                                  |                                                 |                             |
|----------------------------------------------------------------------------------|-------------------------------------------------|-----------------------------|
|  | <b>ASTER ANALYTICS RESEARCH INSTITUTE, PUNE</b> |                             |
| <b>CELL LINE STUDY</b>                                                           |                                                 |                             |
| <b>Report No.</b>                                                                | AARI/IVCL/01/2024-25                            |                             |
| <b>Version No.</b>                                                               | 01                                              | <b>RESTRICTED DOCUMENTS</b> |
| <b>Cell Line Study</b>                                                           |                                                 |                             |

### QUALITY ASSURANCE STATEMENT

This study report has been reviewed by the Quality Assurance department of **Aster Analytics Research Institute** for Study plan, Raw Data and Results.

**Ms. Karishma Markad**  
Research Associate

**Date:** 02.01.2025

|                                                                                  |                                                 |                             |
|----------------------------------------------------------------------------------|-------------------------------------------------|-----------------------------|
|  | <b>ASTER ANALYTICS RESEARCH INSTITUTE, PUNE</b> |                             |
| <b>CELL LINE STUDY</b>                                                           |                                                 |                             |
| <b>Report No.</b>                                                                | AARI/IVCL/01/2024-25                            |                             |
| <b>Version No.</b>                                                               | 01                                              | <b>RESTRICTED DOCUMENTS</b> |
| <b>Cell Line Study</b>                                                           |                                                 |                             |

## 1. Document Control

Aster Analytics Research Institute, Pune

## 2. Objective

To determine the cytotoxicity of C25 Epi-Kavaratamide A *and* Kavaratamide A in the HepG2cell line using the MTT assay method.

## 3. Study Guidelines

The design and scope of the study are based on consideration of the study objectives.

### Study Period

|                                   |   |             |
|-----------------------------------|---|-------------|
| <b>Sample Receiving Date</b>      | : | 28/Dec/2024 |
| <b>Experiment Start Date</b>      | : | 30/Dec/2024 |
| <b>Experiment Completion Date</b> | : | 02/Dec/2024 |
| <b>Study Completion Date</b>      | : | 02/Dec/2024 |
| <b>Draft Report Date</b>          | : | 02/Dec/2024 |
| <b>Final Report Date</b>          | : | 02/Dec/2024 |

## 4. Materials

### Test Item Details

| <b>Sr. No.</b> | <b>Name</b>            | <b>Storage Conditions</b> | <b>Handling Precautions</b>   |
|----------------|------------------------|---------------------------|-------------------------------|
| <b>1.</b>      | C25 Epi-Kavaratamide A | 2-8°C                     | Standard Laboratory Procedure |
| <b>2.</b>      | Kavaratamide A         |                           |                               |

*\*All data relating to the identity, purity and stability of the test materials are the responsibility of the sponsor and have not been verified by the test facility.*

## 5. Experimental Procedures

### a. Preparation of Test Material

All Test Samples were filter sterilized using 0.22μ filters and diluted by double

|                                                                                  |                                                 |                             |
|----------------------------------------------------------------------------------|-------------------------------------------------|-----------------------------|
|  | <b>ASTER ANALYTICS RESEARCH INSTITUTE, PUNE</b> |                             |
| <b>CELL LINE STUDY</b>                                                           |                                                 |                             |
| <b>Report No.</b>                                                                | AARI/IVCL/01/2024-25                            |                             |
| <b>Version No.</b>                                                               | 01                                              | <b>RESTRICTED DOCUMENTS</b> |
| <b>Cell Line Study</b>                                                           |                                                 |                             |

dilution method in MEM with FBS.

## b. Chemicals and Materials

|                            |   |                                                                                            |
|----------------------------|---|--------------------------------------------------------------------------------------------|
| <b>Cell Culture Plates</b> | : | 96 well microtiter plates (Corning)                                                        |
| <b>Cell culture flasks</b> | : | T25 Flasks (Falcon)                                                                        |
| <b>Trypsin/EDTA</b>        | : | 0.25% Trypsin and 0.02% EDTA in Dulbecco's Phosphate Buffered Saline (Gibco Thermo Fisher) |
| <b>DMSO</b>                | : | Dimethyl sulfoxide (Sigma)                                                                 |
| <b>ISOPROPANOL</b>         | : | Isopropanol                                                                                |
| <b>Cell culture Medium</b> | : | D-Modified Eagle Medium (DMEM) containing 10% (v/v) Fetal Bovine Serum. P&S                |
| <b>Cell Line</b>           | : | HepG2                                                                                      |
| <b>Culture Conditions</b>  | : | 37 <sup>0</sup> C with 5% CO <sub>2</sub>                                                  |

## 6. MTT Assay

### a. Preparation of Cells

HepG2 cells were cultured in D-Modified Eagle Medium (DMEM) with NEAA media supplemented with 10% (v/v) fetal bovine serum. Cells were cultured at 37<sup>0</sup>C and 5% CO<sub>2</sub>; the complete medium was changed every 2 to 3 days.

### b. MTT Assay Procedure

- Cells were seeded in 96-well plates at a concentration of 1,00,000 cells per well (100 µl). The plates were incubated at 37<sup>0</sup>C and 5% CO<sub>2</sub> atmosphere for 24 hr.
- After the incubation period cells were observed for half confluent monolayer.
- Culture medium was removed, and cells were treated with 9 different concentrations of Test item.

|                                                                                  |                                          |                      |
|----------------------------------------------------------------------------------|------------------------------------------|----------------------|
|  | ASTER ANALYTICS RESEARCH INSTITUTE, PUNE |                      |
| CELL LINE STUDY                                                                  |                                          |                      |
| Report No.                                                                       | AARI/IVCL/01/2024-25                     |                      |
| Version No.                                                                      | 01                                       | RESTRICTED DOCUMENTS |
| Cell Line Study                                                                  |                                          |                      |

- Cells in cell culture medium without any Test Item incubated for 24 hr under the same condition served as Control.
- Plates were incubated at 37°C in 5% CO<sub>2</sub> incubator for 24 hr.
- After 48 hr, cells were observed under an inverted microscope for any changes in morphology or death.
- After observation, the culture medium was removed, and 100 µl of fresh medium was added along with 10 µl of MTT reagent in each well.
- Plates were incubated for 4 hr. at 37°C in 5% CO<sub>2</sub> incubator.
- 100 µl of the Solubilization solution was added into each well.
- Plate was allowed to stand for 1 hr. at 37°C in 5% CO<sub>2</sub> incubator.
- After checking for complete solubilization of the purple formazan crystals, absorbance was measured at 570 nm using a microplate reader.
- IC<sub>50</sub> values were calculated by plotting a log graph for the concentration of the test items vs %cell survival.
- Percentage Cell Survival was calculated using the formula:

$$\text{Percent Cell Survival (\%)} = \frac{\text{Absorbance of Test}}{\text{Absorbance of Control}} \times 100$$

## 7. Observation and Results

### 1. C25 Epi-Kavaratamide A

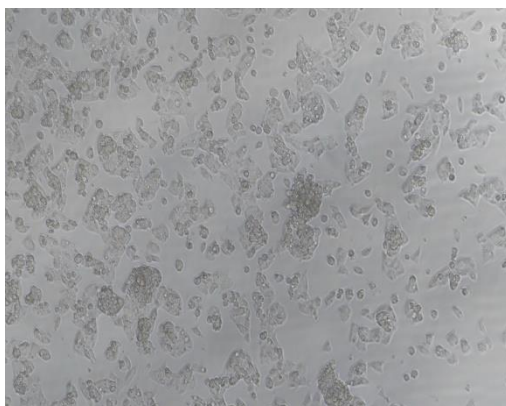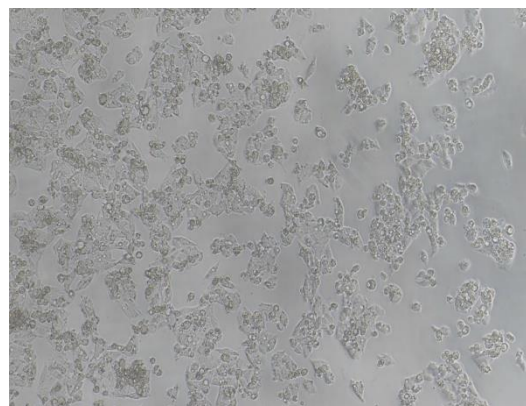

|                                                                                  |                                          |                      |
|----------------------------------------------------------------------------------|------------------------------------------|----------------------|
|  | ASTER ANALYTICS RESEARCH INSTITUTE, PUNE |                      |
| CELL LINE STUDY                                                                  |                                          |                      |
| Report No.                                                                       | AARI/IVCL/01/2024-25                     |                      |
| Version No.                                                                      | 01                                       | RESTRICTED DOCUMENTS |
| Cell Line Study                                                                  |                                          |                      |

**Figure 1. Morphological Observations of Control Well of C25 Epi-Kavaratamide A**

| Dilutions     | C25 Epi-Kavaratamide A<br>(0 hrs)                                                   | C25 Epi-Kavaratamide A<br>(24 hrs)                                                   |
|---------------|-------------------------------------------------------------------------------------|--------------------------------------------------------------------------------------|
| <b>0.01μM</b> | 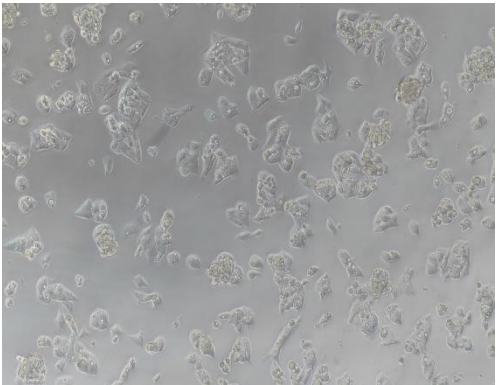  |   |
| <b>0.1 μM</b> |  |  |



|                                                                                  |                                                 |                             |
|----------------------------------------------------------------------------------|-------------------------------------------------|-----------------------------|
|  | <b>ASTER ANALYTICS RESEARCH INSTITUTE, PUNE</b> |                             |
| <b>CELL LINE STUDY</b>                                                           |                                                 |                             |
| <b>Report No.</b>                                                                | AARI/IVCL/01/2024-25                            |                             |
| <b>Version No.</b>                                                               | 01                                              | <b>RESTRICTED DOCUMENTS</b> |
| <b>Cell Line Study</b>                                                           |                                                 |                             |

|                             |                                                                                     |                                                                                      |
|-----------------------------|-------------------------------------------------------------------------------------|--------------------------------------------------------------------------------------|
| <b>1 <math>\mu</math>M</b>  | 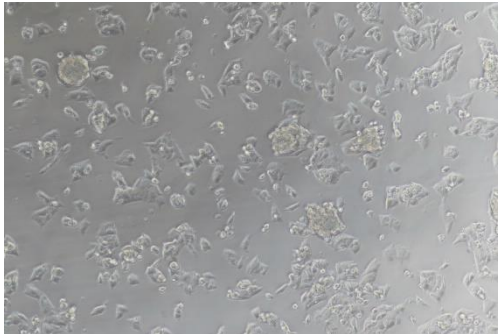   |    |
| <b>10 <math>\mu</math>M</b> |   |   |
| <b>25 <math>\mu</math>M</b> |  |  |

|                                                                                  |                                                 |                             |
|----------------------------------------------------------------------------------|-------------------------------------------------|-----------------------------|
|  | <b>ASTER ANALYTICS RESEARCH INSTITUTE, PUNE</b> |                             |
| <b>CELL LINE STUDY</b>                                                           |                                                 |                             |
| <b>Report No.</b>                                                                | AARI/IVCL/01/2024-25                            |                             |
| <b>Version No.</b>                                                               | 01                                              | <b>RESTRICTED DOCUMENTS</b> |
| <b>Cell Line Study</b>                                                           |                                                 |                             |

|                              |                                                                                     |                                                                                      |
|------------------------------|-------------------------------------------------------------------------------------|--------------------------------------------------------------------------------------|
| <b>50 <math>\mu</math>M</b>  | 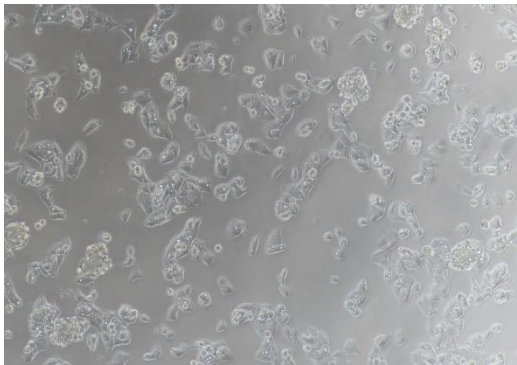   |    |
| <b>75 <math>\mu</math>M</b>  |   |   |
| <b>100 <math>\mu</math>M</b> |  |  |

|                                                                                  |                                                 |                             |
|----------------------------------------------------------------------------------|-------------------------------------------------|-----------------------------|
|  | <b>ASTER ANALYTICS RESEARCH INSTITUTE, PUNE</b> |                             |
| <b>CELL LINE STUDY</b>                                                           |                                                 |                             |
| <b>Report No.</b>                                                                | AARI/IVCL/01/2024-25                            |                             |
| <b>Version No.</b>                                                               | 01                                              | <b>RESTRICTED DOCUMENTS</b> |
| <b>Cell Line Study</b>                                                           |                                                 |                             |

|                              |                                                                                   |                                                                                    |
|------------------------------|-----------------------------------------------------------------------------------|------------------------------------------------------------------------------------|
| <b>150 <math>\mu</math>M</b> | 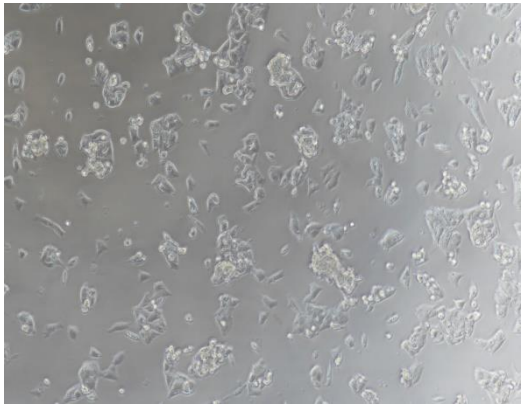 |  |
|------------------------------|-----------------------------------------------------------------------------------|------------------------------------------------------------------------------------|

**Figure 2. Morphological Observations of C25 Epi-Kavaratamide A Treated Wells**

**2. Kavaratamide A**

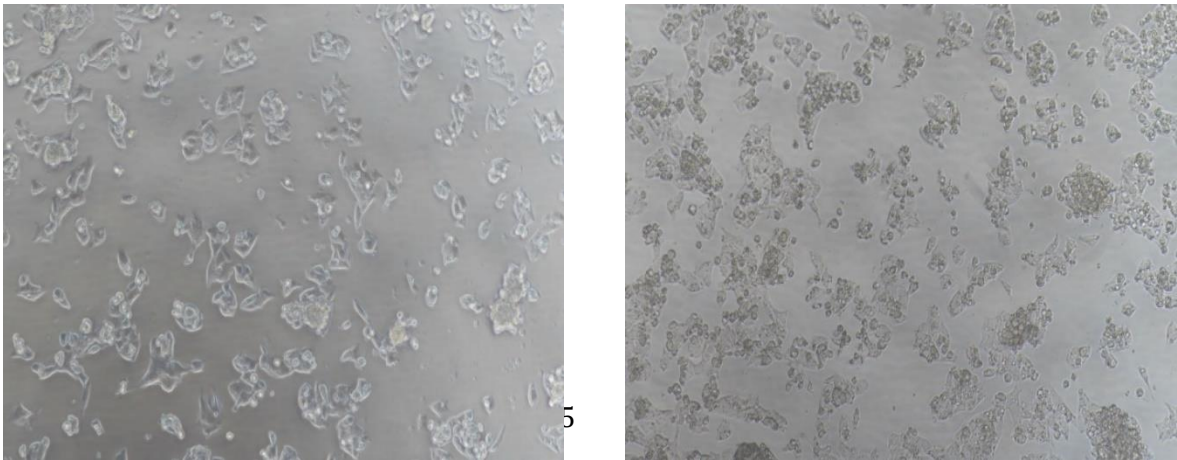



|                                                                                  |                                                 |                             |
|----------------------------------------------------------------------------------|-------------------------------------------------|-----------------------------|
|  | <b>ASTER ANALYTICS RESEARCH INSTITUTE, PUNE</b> |                             |
| <b>CELL LINE STUDY</b>                                                           |                                                 |                             |
| <b>Report No.</b>                                                                | AARI/IVCL/01/2024-25                            |                             |
| <b>Version No.</b>                                                               | 01                                              | <b>RESTRICTED DOCUMENTS</b> |
| <b>Cell Line Study</b>                                                           |                                                 |                             |

**Figure 3. Morphological Observations of Control Well of Kavaratamide A**

| Dilutions                    | Kavaratamide A (0 hr)                                                               | Kavaratamide A (24 hrs)                                                              |
|------------------------------|-------------------------------------------------------------------------------------|--------------------------------------------------------------------------------------|
| <b>0.01<math>\mu</math>M</b> |   |   |
| <b>0.1 <math>\mu</math>M</b> |  |  |

|                                                                                  |                                          |                      |
|----------------------------------------------------------------------------------|------------------------------------------|----------------------|
|  | ASTER ANALYTICS RESEARCH INSTITUTE, PUNE |                      |
| CELL LINE STUDY                                                                  |                                          |                      |
| Report No.                                                                       | AARI/IVCL/01/2024-25                     |                      |
| Version No.                                                                      | 01                                       | RESTRICTED DOCUMENTS |
| Cell Line Study                                                                  |                                          |                      |

|                             |                                                                                     |                                                                                      |
|-----------------------------|-------------------------------------------------------------------------------------|--------------------------------------------------------------------------------------|
| <b>1 <math>\mu</math>M</b>  | 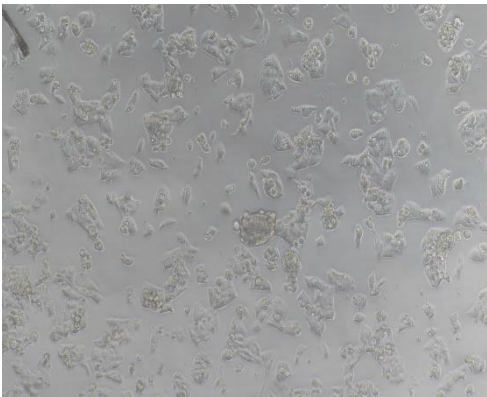   |    |
| <b>10 <math>\mu</math>M</b> |   |   |
| <b>25 <math>\mu</math>M</b> |  |  |

|                                                                                   |                                          |                      |
|-----------------------------------------------------------------------------------|------------------------------------------|----------------------|
|  | ASTER ANALYTICS RESEARCH INSTITUTE, PUNE |                      |
| CELL LINE STUDY                                                                   |                                          |                      |
| Report No.                                                                        | AARI/IVCL/01/2024-25                     |                      |
| Version No.                                                                       | 01                                       | RESTRICTED DOCUMENTS |
| Cell Line Study                                                                   |                                          |                      |

|                              |                                                                                     |                                                                                      |
|------------------------------|-------------------------------------------------------------------------------------|--------------------------------------------------------------------------------------|
| <b>50 <math>\mu</math>M</b>  | 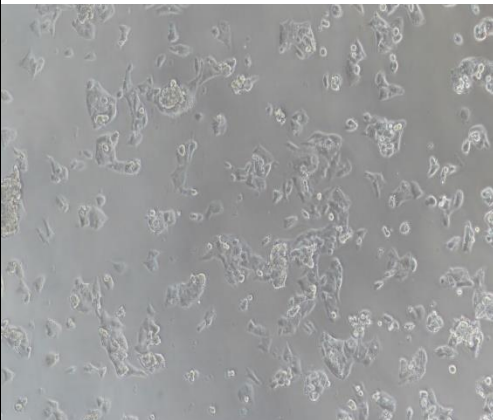   |    |
| <b>75 <math>\mu</math>M</b>  |   |   |
| <b>100 <math>\mu</math>M</b> |  |  |

|                                                                                  |                                                 |                             |
|----------------------------------------------------------------------------------|-------------------------------------------------|-----------------------------|
|  | <b>ASTER ANALYTICS RESEARCH INSTITUTE, PUNE</b> |                             |
| <b>CELL LINE STUDY</b>                                                           |                                                 |                             |
| <b>Report No.</b>                                                                | AARI/IVCL/01/2024-25                            |                             |
| <b>Version No.</b>                                                               | 01                                              | <b>RESTRICTED DOCUMENTS</b> |
| <b>Cell Line Study</b>                                                           |                                                 |                             |

|                              |                                                                                   |                                                                                    |
|------------------------------|-----------------------------------------------------------------------------------|------------------------------------------------------------------------------------|
| <b>150 <math>\mu</math>M</b> |  |  |
|------------------------------|-----------------------------------------------------------------------------------|------------------------------------------------------------------------------------|

**Figure 4. Morphological Observations of Kavaratamide A treated Wells**



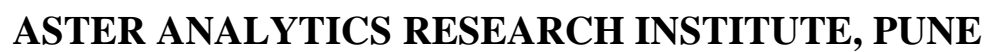

## CELL LINE STUDY

|                   |                      |
|-------------------|----------------------|
| <b>Report No.</b> | AARI/IVCL/01/2024-25 |
|-------------------|----------------------|

|                    |    |
|--------------------|----|
| <b>Version No.</b> | 01 |
|--------------------|----|

**RESTRICTED DOCUMENTS**

## Cell Line Study

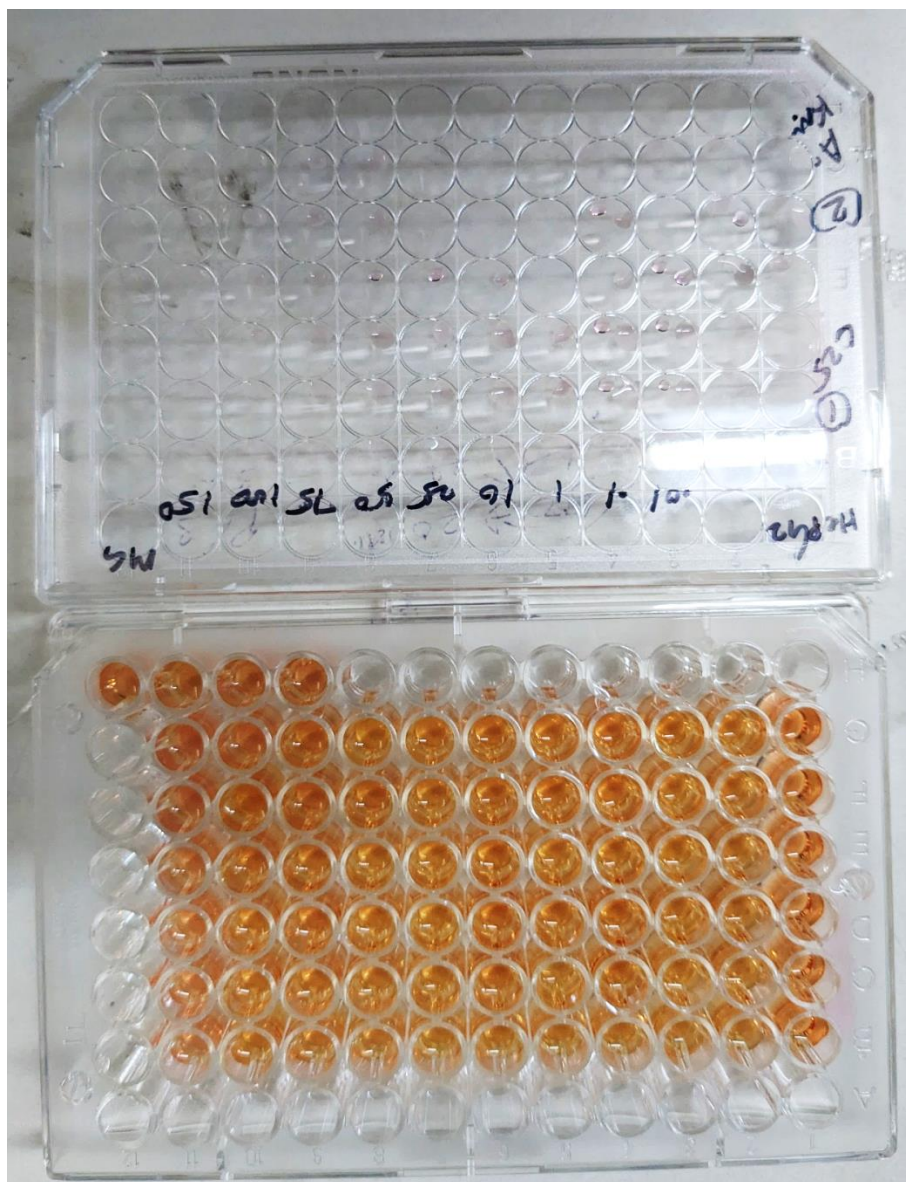

**Figure 5: Microplate Photos of MTT added**



|                                                                                  |                                          |                      |
|----------------------------------------------------------------------------------|------------------------------------------|----------------------|
|  | ASTER ANALYTICS RESEARCH INSTITUTE, PUNE |                      |
| CELL LINE STUDY                                                                  |                                          |                      |
| Report No.                                                                       | AARI/IVCL/01/2024-25                     |                      |
| Version No.                                                                      | 01                                       | RESTRICTED DOCUMENTS |
| Cell Line Study                                                                  |                                          |                      |

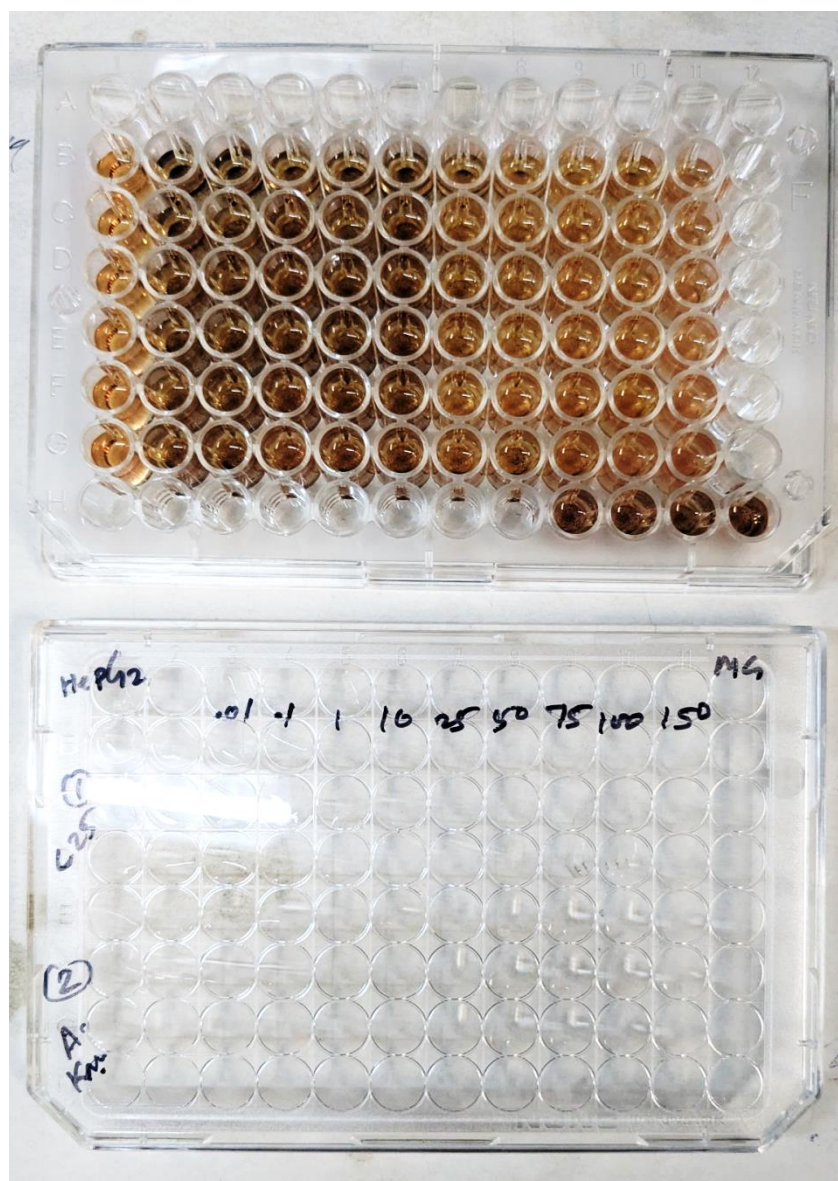

**Figure 6: Microplate Photos of 3.5 hrs MTT added**

|                                                                                   |                      |                                                 |  |
|-----------------------------------------------------------------------------------|----------------------|-------------------------------------------------|--|
|  |                      | <b>ASTER ANALYTICS RESEARCH INSTITUTE, PUNE</b> |  |
| <b>CELL LINE STUDY</b>                                                            |                      |                                                 |  |
| <b>Report No.</b>                                                                 | AARI/IVCL/01/2024-25 |                                                 |  |
| <b>Version No.</b>                                                                | 01                   | <b>RESTRICTED DOCUMENTS</b>                     |  |
| <b>Cell Line Study</b>                                                            |                      |                                                 |  |

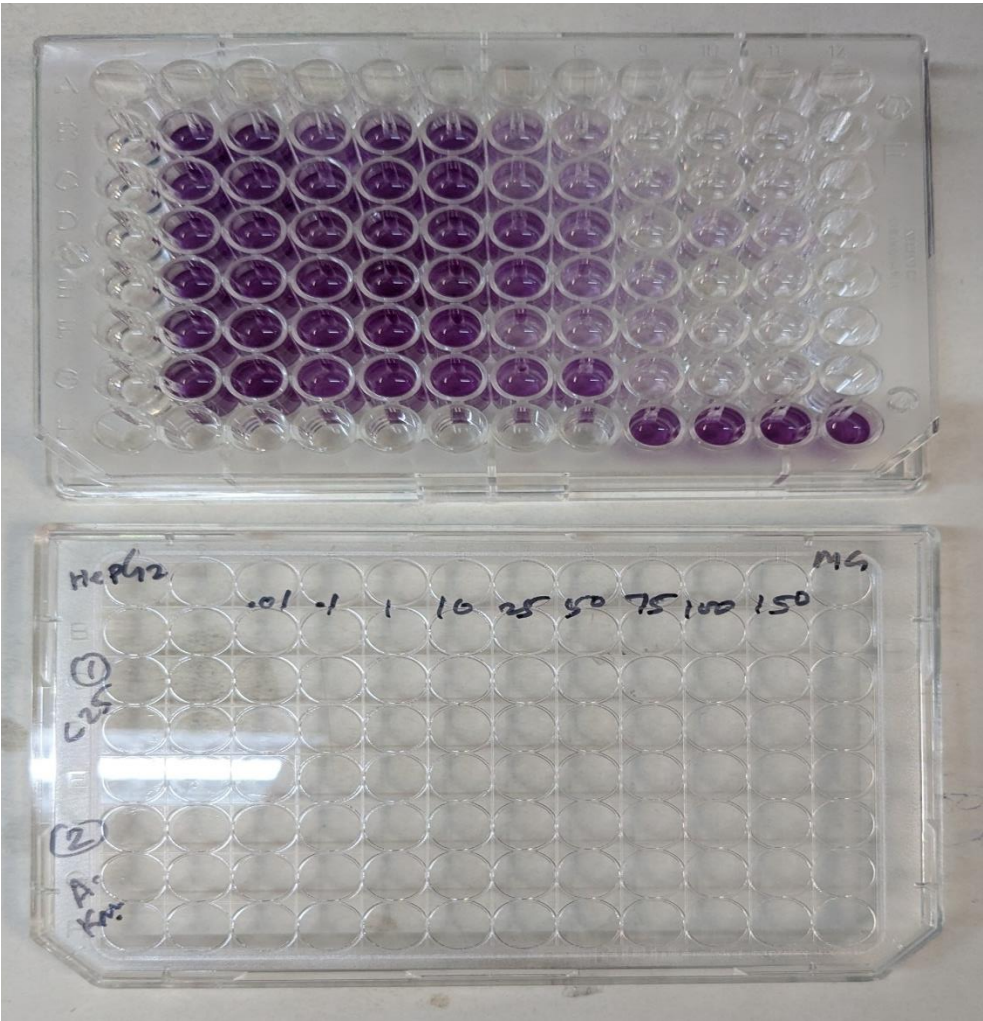

Figure 7. Microplate Photos of Before Reading, After Isopropanol added

|                                                                                  |                                                 |                             |
|----------------------------------------------------------------------------------|-------------------------------------------------|-----------------------------|
|  | <b>ASTER ANALYTICS RESEARCH INSTITUTE, PUNE</b> |                             |
| <b>CELL LINE STUDY</b>                                                           |                                                 |                             |
| <b>Report No.</b>                                                                | AARI/IVCL/01/2024-25                            |                             |
| <b>Version No.</b>                                                               | 01                                              | <b>RESTRICTED DOCUMENTS</b> |
| <b>Cell Line Study</b>                                                           |                                                 |                             |

**Table 1. MTT Results: C25 Epi-Kavaratamide A**

| Concentration (μM)    | Absorbance      |       |       | Average | % Cell Survival |       |        | Average % Cell Survival |
|-----------------------|-----------------|-------|-------|---------|-----------------|-------|--------|-------------------------|
| CTRL                  | 1.407           | 1.325 | 1.446 | 1.393   | 101.03          | 95.14 | 103.83 | 100.00                  |
| 0.01                  | 1.065           | 1.175 | 1.184 | 1.141   | 76.47           | 84.37 | 85.02  | 81.95                   |
| 0.1                   | 0.748           | 1.24  | 1.173 | 1.054   | 53.71           | 89.04 | 84.23  | 75.66                   |
| 1                     | 1.013           | 1.074 | 1.118 | 1.068   | 72.74           | 77.12 | 80.28  | 76.71                   |
| 10                    | 0.991           | 0.995 | 1.259 | 1.082   | 71.16           | 71.45 | 90.40  | 77.67                   |
| 25                    | 0.404           | 0.522 | 0.736 | 0.554   | 29.01           | 37.48 | 52.85  | 39.78                   |
| 50                    | 0.236           | 0.391 | 0.518 | 0.382   | 16.95           | 28.08 | 37.19  | 27.41                   |
| 75                    | 0.084           | 0.21  | 0.121 | 0.138   | 6.03            | 15.08 | 8.69   | 9.93                    |
| 100                   | 0.103           | 0.128 | 0.228 | 0.153   | 7.40            | 9.19  | 16.37  | 10.99                   |
| 150                   | 0.089           | 0.123 | 0.168 | 0.127   | 6.39            | 8.83  | 12.06  | 9.10                    |
| <b>Log IC50 Value</b> | <b>1.581</b>    |       |       |         |                 |       |        |                         |
| <b>IC50 Value</b>     | <b>38.10 μM</b> |       |       |         |                 |       |        |                         |

**IC50=38.10**

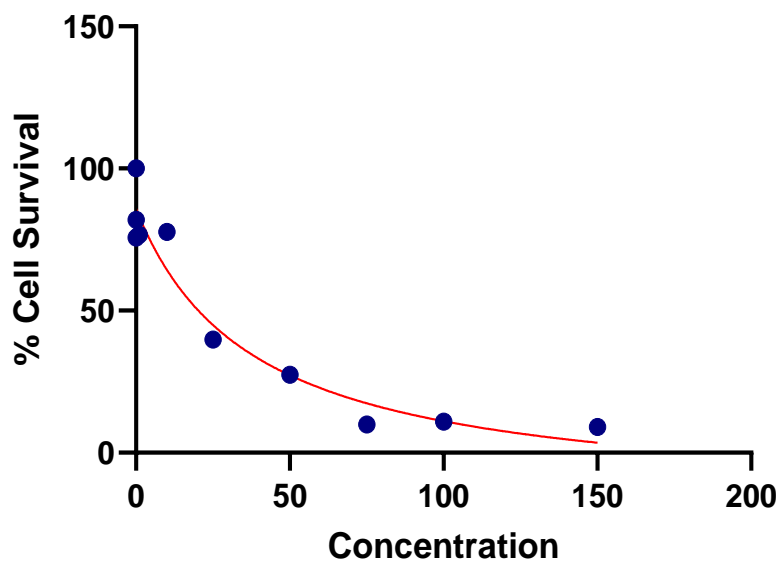

**Figure 8. IC50 of C25 Epi-Kavaratamide A**

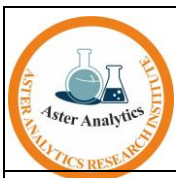

# ASTER ANALYTICS RESEARCH INSTITUTE, PUNE

## CELL LINE STUDY

**Report No.** AARI/IVCL/01/2024-25

**Version No.** 01

**RESTRICTED DOCUMENTS**

## Cell Line Study

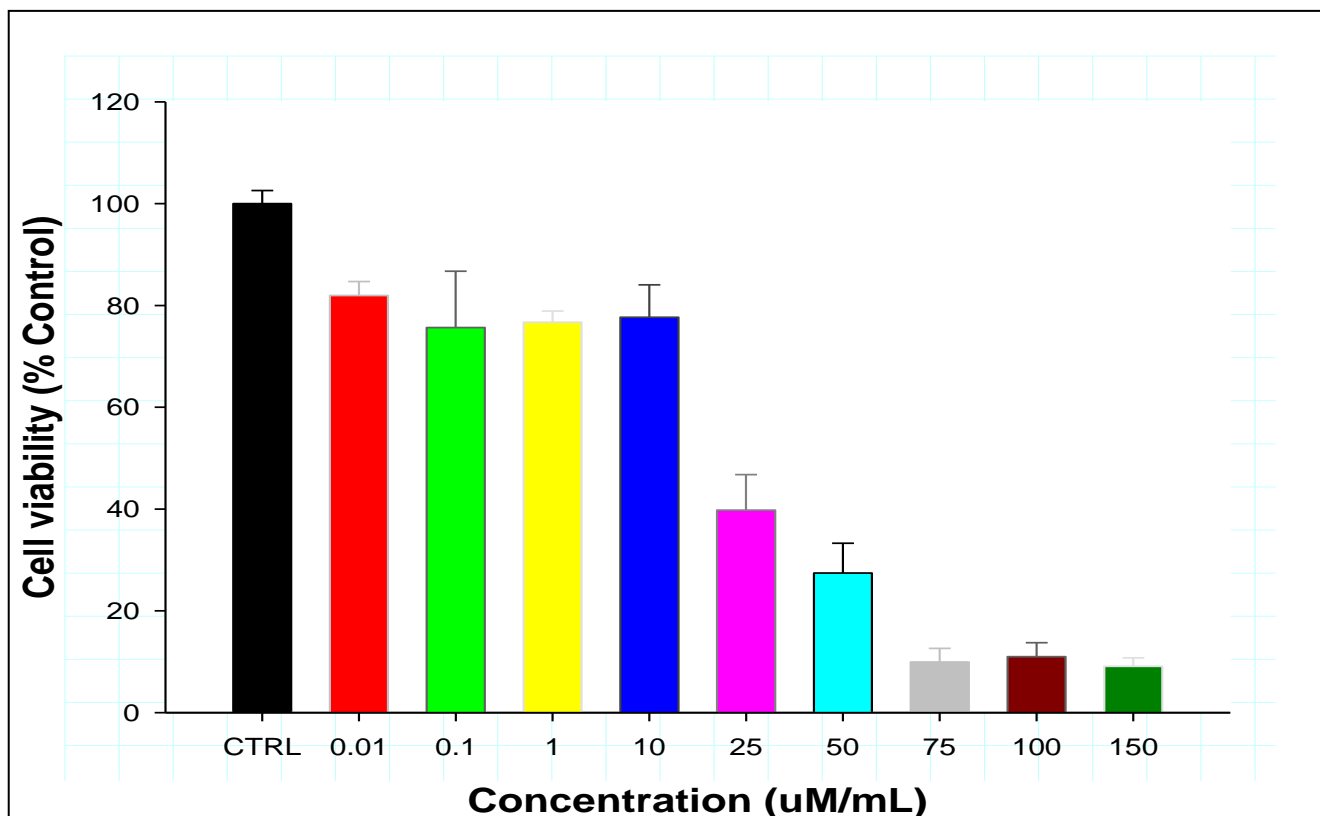

**Figure 9. Graph of conc. vs % cell Viability**

**Table 2. MTT Results: Kavaratamide A**

| Concentration (μM) | Absorbance |       |       | Average | % Cell Survival |       |        | Average % Cell Survival |
|--------------------|------------|-------|-------|---------|-----------------|-------|--------|-------------------------|
| <b>CTRL</b>        | 1.507      | 1.193 | 1.293 | 1.331   | 113.22          | 89.63 | 97.15  | 100.00                  |
| <b>0.01</b>        | 1.199      | 1.173 | 1.353 | 1.242   | 90.08           | 88.13 | 101.65 | 93.29                   |
| <b>0.1</b>         | 1.062      | 1.039 | 0.983 | 1.028   | 79.79           | 78.06 | 73.85  | 77.24                   |
| <b>1</b>           | 1.14       | 1.157 | 0.976 | 1.091   | 85.65           | 86.93 | 73.33  | 81.97                   |
| <b>10</b>          | 0.808      | 0.962 | 0.951 | 0.907   | 60.71           | 72.28 | 71.45  | 68.14                   |

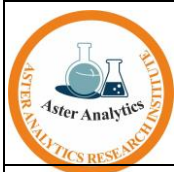

# ASTER ANALYTICS RESEARCH INSTITUTE, PUNE

## CELL LINE STUDY

|                 |                      |                      |
|-----------------|----------------------|----------------------|
| Report No.      | AARI/IVCL/01/2024-25 |                      |
| Version No.     | 01                   | RESTRICTED DOCUMENTS |
| Cell Line Study |                      |                      |

|                |               |       |       |       |       |       |       |       |
|----------------|---------------|-------|-------|-------|-------|-------|-------|-------|
| 25             | 0.733         | 0.475 | 0.644 | 0.617 | 55.07 | 35.69 | 48.38 | 46.38 |
| 50             | 0.353         | 0.307 | 0.724 | 0.461 | 26.52 | 23.07 | 54.40 | 34.66 |
| 75             | 0.238         | 0.225 | 0.198 | 0.220 | 17.88 | 16.90 | 14.88 | 16.55 |
| 100            | 0.12          | 0.119 | 0.112 | 0.117 | 9.02  | 8.94  | 8.41  | 8.79  |
| 150            | 0.111         | 0.079 | 0.16  | 0.117 | 8.34  | 5.94  | 12.02 | 8.77  |
| Log IC50 Value | 1.579         |       |       |       |       |       |       |       |
| IC50 Value     | 37.90 $\mu$ M |       |       |       |       |       |       |       |

IC50=37.90

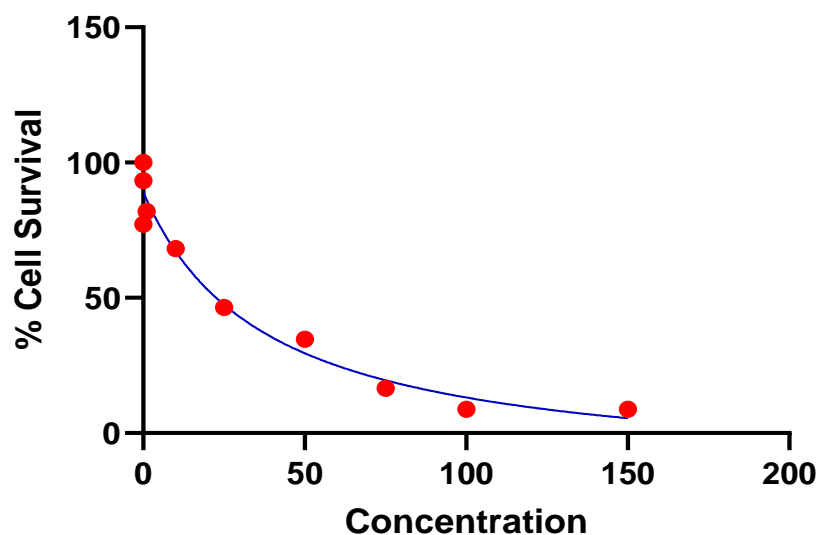

Figure 10. IC50 of Kavaratamide A

|                                                                                  |                                          |                      |
|----------------------------------------------------------------------------------|------------------------------------------|----------------------|
|  | ASTER ANALYTICS RESEARCH INSTITUTE, PUNE |                      |
| CELL LINE STUDY                                                                  |                                          |                      |
| Report No.                                                                       | AARI/IVCL/01/2024-25                     |                      |
| Version No.                                                                      | 01                                       | RESTRICTED DOCUMENTS |
| Cell Line Study                                                                  |                                          |                      |

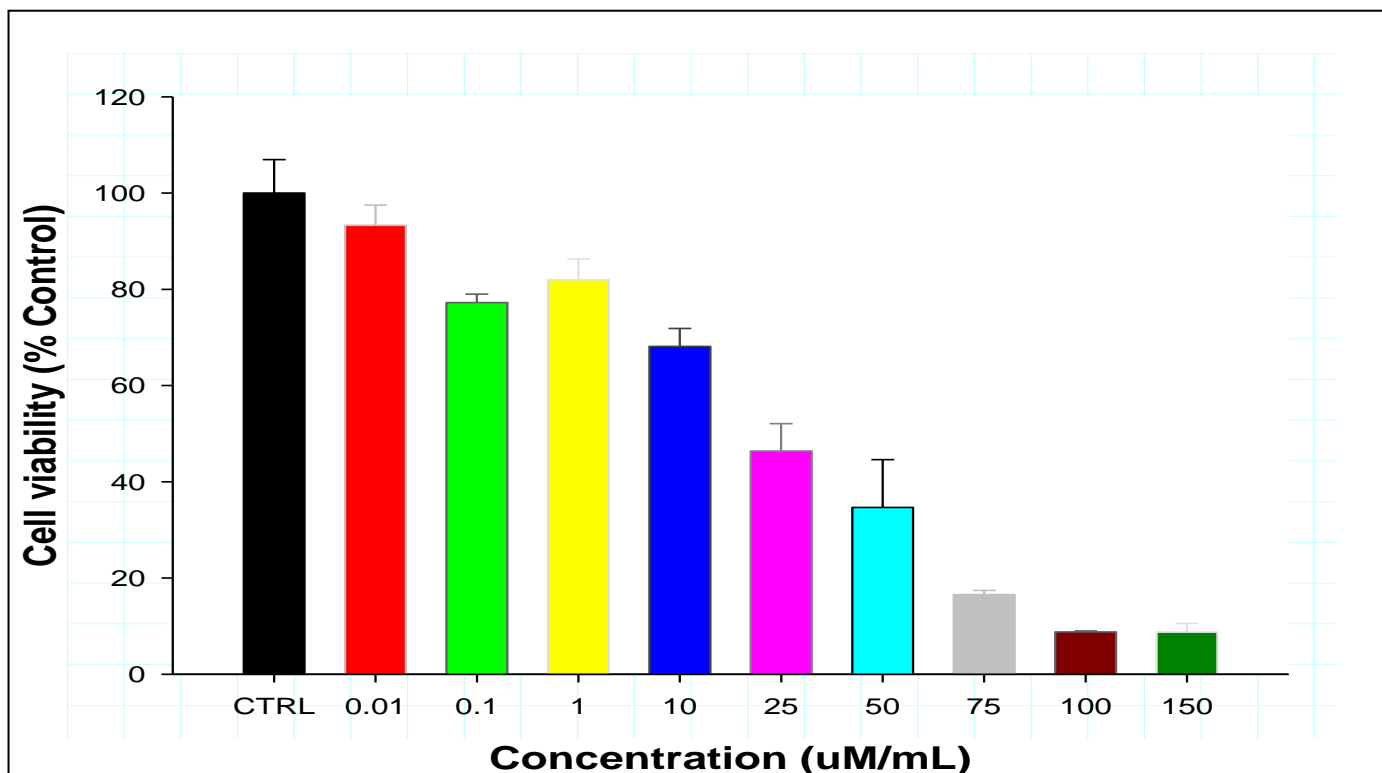

**Figure 10. Graph of conc. vs % cell Viability**

**Table 3. IC50 values of MTT Assay**

| Sr. No. | Test Item              | Log IC50 Value | IC50 Value |
|---------|------------------------|----------------|------------|
| 1.      | C25 Epi-Kavaratamide A | 1.581          | 38.10      |
| 2.      | Kavaratamide A         | 1.579          | 37.90      |

|                                                                                  |                                          |                      |
|----------------------------------------------------------------------------------|------------------------------------------|----------------------|
|  | ASTER ANALYTICS RESEARCH INSTITUTE, PUNE |                      |
| CELL LINE STUDY                                                                  |                                          |                      |
| Report No.                                                                       | AARI/IVCL/01/2024-25                     |                      |
| Version No.                                                                      | 01                                       | RESTRICTED DOCUMENTS |
| Cell Line Study                                                                  |                                          |                      |

## 8. Data Analysis and Report Preparation

GraphPad Prism Ver. 10.00 was used for the statistical analysis. The extracted sheets of statistical analysis are provided along with the report in text format.

Two final copies of final reports are generated. One copy is shared with the Sponsor, and the other copy is submitted to the archives.

Note - After sending a draft report, if no comments are received from the Sponsor within 10 days, the draft report and the raw data shall be archived as such.

## 9. Archives

All original raw data, final report and all electronic files generated will be retained in archives. Thereafter, the archived material will be either destroyed or stored for an extended period as per written consent from the sponsor.

## 10. Study Plan Amendment and Deviations

No study plan amendments or deviations occurred during the study.



|                                                                                  |                                                 |                             |
|----------------------------------------------------------------------------------|-------------------------------------------------|-----------------------------|
|  | <b>ASTER ANALYTICS RESEARCH INSTITUTE, PUNE</b> |                             |
| <b>CELL LINE STUDY</b>                                                           |                                                 |                             |
| <b>Report No.</b>                                                                | AARI/IVCL/02/2024-25                            |                             |
| <b>Version No.</b>                                                               | 01                                              | <b>RESTRICTED DOCUMENTS</b> |
| <b>Cell Line Study</b>                                                           |                                                 |                             |

## **5. Report On**

**“Cytotoxicity study of C25 Epi-Kavaratamide A and Kavaratamide A in PANC-1 Cell Line.”**

### **REPORT NUMBER**

**AARI/IVCL/02/2024-25**

### **PREPARED & APPROVED BY**

**ASTER ANALYTICS RESEARCH INSTITUTE**

**227, SRP ROAD, PANDAVNAGAR, WADACHI WADI, PUNE-411060**

### **SPONSORED BY**

**DR. RAVINDAR KONTHAM**

**PRINCIPAL SCIENTIST**

**CSIR-NATIONAL CHEMICAL LABORATORY**

**DATE OF ISSUE OF REPORT: 02.01.2025**

**DATE OF RELEASE OF REPORT: 02.01.2025**

**This report contains 23 pages.**



|                                                                                  |                                          |                      |
|----------------------------------------------------------------------------------|------------------------------------------|----------------------|
|  | ASTER ANALYTICS RESEARCH INSTITUTE, PUNE |                      |
| CELL LINE STUDY                                                                  |                                          |                      |
| Report No.                                                                       | AARI/IVCL/02/2024-25                     |                      |
| Version No.                                                                      | 01                                       | RESTRICTED DOCUMENTS |
| Cell Line Study                                                                  |                                          |                      |

## CONTENTS

| <b>Sr. No</b> | <b>Description</b>                   | <b>Page Number</b> |
|---------------|--------------------------------------|--------------------|
| <b>1.</b>     | Study Details                        | <b>S50</b>         |
| <b>2.</b>     | Compliance statement                 | <b>S51</b>         |
| <b>3.</b>     | Quality Assurance Statement          | <b>S52</b>         |
| <b>4.</b>     | Document Control                     | <b>S53</b>         |
| <b>5.</b>     | Objective                            | <b>S53</b>         |
| <b>6.</b>     | Study Guidelines                     | <b>S53</b>         |
| <b>7.</b>     | Study Period                         | <b>S53</b>         |
| <b>8.</b>     | Materials                            | <b>S53</b>         |
| <b>9.</b>     | Experimental Procedures              | <b>S53</b>         |
| <b>10.</b>    | MTT Assay                            | <b>S54</b>         |
| <b>11.</b>    | Observation and Results              | <b>S55</b>         |
| <b>12.</b>    | Data Analysis and Report Preparation | <b>S70</b>         |
| <b>13.</b>    | Archives                             | <b>S70</b>         |
| <b>14.</b>    | Study Plan Amendment and Deviations  | <b>S70</b>         |

|                                                                                   |                                                 |                             |
|-----------------------------------------------------------------------------------|-------------------------------------------------|-----------------------------|
|  | <b>ASTER ANALYTICS RESEARCH INSTITUTE, PUNE</b> |                             |
| <b>CELL LINE STUDY</b>                                                            |                                                 |                             |
| <b>Report No.</b>                                                                 | AARI/IVCL/02/2024-25                            |                             |
| <b>Version No.</b>                                                                | 01                                              | <b>RESTRICTED DOCUMENTS</b> |
| <b>Cell Line Study</b>                                                            |                                                 |                             |

### STUDY DETAILS

|                       |   |                                                                                                |
|-----------------------|---|------------------------------------------------------------------------------------------------|
| <b>Report Number</b>  | : | AARI/IVCL/02/2024-25                                                                           |
| <b>Study Title</b>    | : | Cytotoxicity study of C25 Epi-Kavaratamide A and Kavaratamide A in PANC-1 Cell Line.           |
| <b>Sponsor</b>        | : | Dr. Ravindar Kontham<br>Principal Scientist<br>CSIR-National Chemical Laboratory               |
| <b>Test Facility</b>  | : | Aster Analytics Research Institute<br>227, SRP Road, Pandavnagar,<br>Wadachi Wadi, Pune-411060 |
| <b>Study Director</b> | : | Dr. Amit Kasabe                                                                                |
| <b>Study personal</b> | : | Ms. Karishma Markad                                                                            |
| <b>Period</b>         | : | 30.12.2024 to 02.01.2025                                                                       |

|                                                                                  |                                                 |                             |
|----------------------------------------------------------------------------------|-------------------------------------------------|-----------------------------|
|  | <b>ASTER ANALYTICS RESEARCH INSTITUTE, PUNE</b> |                             |
| <b>CELL LINE STUDY</b>                                                           |                                                 |                             |
| <b>Report No.</b>                                                                | AARI/IVCL/02/2024-25                            |                             |
| <b>Version No.</b>                                                               | 01                                              | <b>RESTRICTED DOCUMENTS</b> |
| <b>Cell Line Study</b>                                                           |                                                 |                             |

### COMPLIANCE STATEMENT

I, the Undersigned hereby state and declare that this, “Report No. AARI/IVCL/02/2024-25” was performed under my supervision in compliance with the ICH guidelines.

Characterization of the “Test Items/Samples” was performed by the sponsor. Test Laboratory is responsible for validity of the test procedure, interpretation, analysis, documentation and test reports.

**Dr. Amit Kasabe**  
**Director**

**Date:** 02.01.2025

|                                                                                  |                                                 |                             |
|----------------------------------------------------------------------------------|-------------------------------------------------|-----------------------------|
|  | <b>ASTER ANALYTICS RESEARCH INSTITUTE, PUNE</b> |                             |
| <b>CELL LINE STUDY</b>                                                           |                                                 |                             |
| <b>Report No.</b>                                                                | AARI/IVCL/02/2024-25                            |                             |
| <b>Version No.</b>                                                               | 01                                              | <b>RESTRICTED DOCUMENTS</b> |
| <b>Cell Line Study</b>                                                           |                                                 |                             |

### QUALITY ASSURANCE STATEMENT

This study report has been reviewed by the Quality Assurance department of **Aster Analytics Research Institute** for Study plan, Raw Data and Results.

**Ms. Karishma Markad**  
Research Associate

**Date:** 02.01.2025

|                                                                                  |                                                 |                             |
|----------------------------------------------------------------------------------|-------------------------------------------------|-----------------------------|
|  | <b>ASTER ANALYTICS RESEARCH INSTITUTE, PUNE</b> |                             |
| <b>CELL LINE STUDY</b>                                                           |                                                 |                             |
| <b>Report No.</b>                                                                | AARI/IVCL/02/2024-25                            |                             |
| <b>Version No.</b>                                                               | 01                                              | <b>RESTRICTED DOCUMENTS</b> |
| <b>Cell Line Study</b>                                                           |                                                 |                             |

## 1. Document Control

Aster Analytics Research Institute, Pune

## 2. Objective

To determine the cytotoxicity of C25 Epi-Kavaratamide A and Kavaratamide A in the PANC-1 cell line using the MTT assay method.

## 3. Study Guidelines

The design and scope of the study are based on consideration of the study objectives.

### Study Period

|                                   |   |             |
|-----------------------------------|---|-------------|
| <b>Sample Receiving Date</b>      | : | 28/Dec/2024 |
| <b>Experiment Start Date</b>      | : | 30/Dec/2024 |
| <b>Experiment Completion Date</b> | : | 02/Dec/2024 |
| <b>Study Completion Date</b>      | : | 02/Dec/2024 |
| <b>Draft Report Date</b>          | : | 02/Dec/2024 |
| <b>Final Report Date</b>          | : | 02/Dec/2024 |

## 4. Materials

### Test Item Details

| <b>Sr. No.</b> | <b>Name</b>            | <b>Storage Conditions</b> | <b>Handling Precautions</b>   |
|----------------|------------------------|---------------------------|-------------------------------|
| <b>1.</b>      | C25 Epi-Kavaratamide A | 2-8°C                     | Standard Laboratory Procedure |
| <b>2.</b>      | Kavaratamide A         |                           |                               |

*\*All data relating to the identity, purity and stability of the test materials are the responsibility of the sponsor and have not been verified by the test facility.*

## 5. Experimental Procedures

### a. Preparation of Test Material

All Test Samples were filter sterilized using 0.22μ filters and diluted by double

|                                                                                  |                                                 |                             |
|----------------------------------------------------------------------------------|-------------------------------------------------|-----------------------------|
|  | <b>ASTER ANALYTICS RESEARCH INSTITUTE, PUNE</b> |                             |
| <b>CELL LINE STUDY</b>                                                           |                                                 |                             |
| <b>Report No.</b>                                                                | AARI/IVCL/02/2024-25                            |                             |
| <b>Version No.</b>                                                               | 01                                              | <b>RESTRICTED DOCUMENTS</b> |
| <b>Cell Line Study</b>                                                           |                                                 |                             |

dilution method in MEM with FBS.

## b. Chemicals and Materials

|                            |                                                                                              |
|----------------------------|----------------------------------------------------------------------------------------------|
| <b>Cell Culture Plates</b> | : 96 well microtiter plates (Corning)                                                        |
| <b>Cell culture flasks</b> | : T25 Flasks (Falcon)                                                                        |
| <b>Trypsin/EDTA</b>        | : 0.25% Trypsin and 0.02% EDTA in Dulbecco's Phosphate Buffered Saline (Gibco Thermo Fisher) |
| <b>DMSO</b>                | : Dimethyl sulfoxide (Sigma)                                                                 |
| <b>ISOPROPANOL</b>         | : Isopropanol                                                                                |
| <b>Cell culture Medium</b> | : D-Modified Eagle Medium (DMEM) containing 10% (v/v) Fetal Bovine Serum. P&S                |
| <b>Cell Line</b>           | : PANC-1                                                                                     |
| <b>Culture Conditions</b>  | : 370C with 5% CO <sub>2</sub>                                                               |

## 6. MTT Assay

### a. Preparation of Cells

PANC-1 cells were cultured in D-Modified Eagle Medium (DMEM) with NEAA media supplemented with 10% (v/v) fetal bovine serum. Cells were cultured at 370C and 5% CO<sub>2</sub>; the complete medium was changed every 2 to 3 days.

### b. MTT Assay Procedure

- Cells were seeded in 96-well plates at a concentration of 1,00,000 cells per well (100 µl). The plates were incubated at 37°C and 5% CO<sub>2</sub> atmosphere for 24 hr.
- After the incubation period cells were observed for half confluent monolayer.
- Culture medium was removed, and cells were treated with 9 different concentrations of Test item.

|                                                                                  |                                                 |                             |
|----------------------------------------------------------------------------------|-------------------------------------------------|-----------------------------|
|  | <b>ASTER ANALYTICS RESEARCH INSTITUTE, PUNE</b> |                             |
| <b>CELL LINE STUDY</b>                                                           |                                                 |                             |
| <b>Report No.</b>                                                                | AARI/IVCL/02/2024-25                            |                             |
| <b>Version No.</b>                                                               | 01                                              | <b>RESTRICTED DOCUMENTS</b> |
| <b>Cell Line Study</b>                                                           |                                                 |                             |

- Cells in cell culture medium without any Test Item incubated for 24 hr. under the same condition served as Control.
- Plates were incubated at 37°C in 5% CO<sub>2</sub> incubator for 24 hr.
- After 48 hr., cells were observed under an inverted microscope for any changes in morphology or death.
- After observation, the culture medium was removed, and 100 µl of fresh medium was added along with 10 µl of MTT reagent in each well.
- Plates were incubated for 4 hr. at 37°C in 5% CO<sub>2</sub> incubator.
- 100 µl of the Solubilization solution was added into each well.
- Plate was allowed to stand for 1 hr. at 37°C in 5% CO<sub>2</sub> incubator.
- After checking for complete solubilization of the purple formazan crystals, absorbance was measured at 570 nm using a microplate reader.
- IC<sub>50</sub> values were calculated by plotting a log graph for the concentration of the test items vs %cell survival.
- Percentage Cell Survival was calculated using the formula:

$$\text{Percent Cell Survival (\%)} = \frac{\text{Absorbance of Test}}{\text{Absorbance of Control}} \times 100$$

## 7. Observation and Results

### 1. C25 Epi-Kavaratamide A

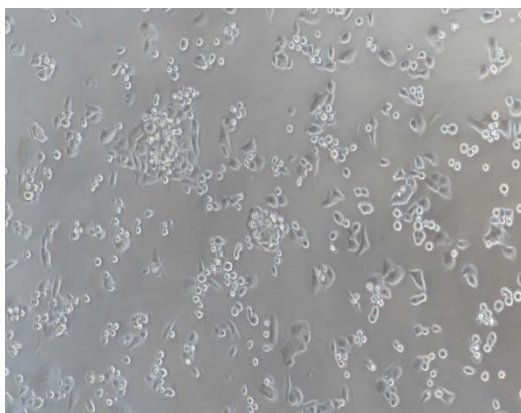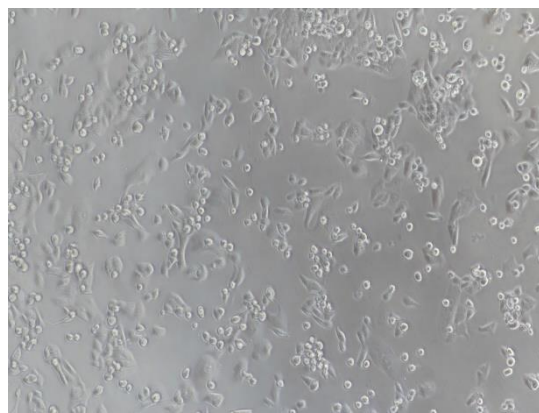

|                                                                                  |                                                 |                             |
|----------------------------------------------------------------------------------|-------------------------------------------------|-----------------------------|
|  | <b>ASTER ANALYTICS RESEARCH INSTITUTE, PUNE</b> |                             |
| <b>CELL LINE STUDY</b>                                                           |                                                 |                             |
| <b>Report No.</b>                                                                | AARI/IVCL/02/2024-25                            |                             |
| <b>Version No.</b>                                                               | 01                                              | <b>RESTRICTED DOCUMENTS</b> |
| <b>Cell Line Study</b>                                                           |                                                 |                             |

**Figure 1. Morphological Observations of Control Well of C25 Epi-Kavaratamide A**

| <b>Dilutions</b> | <b>C25 Epi-Kavaratamide A<br/>(0 hr)</b>                                            | <b>C25 Epi-Kavaratamide A<br/>(24 hrs)</b>                                           |
|------------------|-------------------------------------------------------------------------------------|--------------------------------------------------------------------------------------|
| <b>0.01µM</b>    | 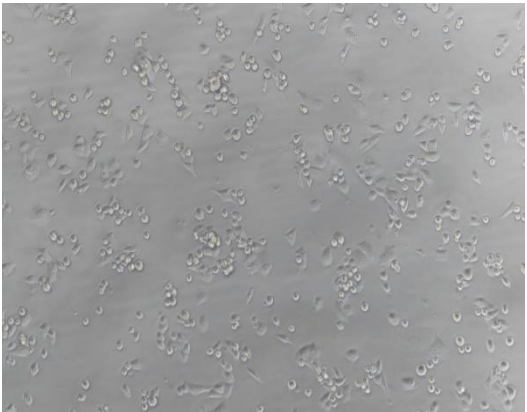 |  |



|                                                                                  |                                                 |                             |
|----------------------------------------------------------------------------------|-------------------------------------------------|-----------------------------|
|  | <b>ASTER ANALYTICS RESEARCH INSTITUTE, PUNE</b> |                             |
| <b>CELL LINE STUDY</b>                                                           |                                                 |                             |
| <b>Report No.</b>                                                                | AARI/IVCL/02/2024-25                            |                             |
| <b>Version No.</b>                                                               | 01                                              | <b>RESTRICTED DOCUMENTS</b> |
| <b>Cell Line Study</b>                                                           |                                                 |                             |

|                              |                                                                                     |                                                                                      |
|------------------------------|-------------------------------------------------------------------------------------|--------------------------------------------------------------------------------------|
| <b>0.1 <math>\mu</math>M</b> |    |    |
| <b>1 <math>\mu</math>M</b>   |   |   |
| <b>10 <math>\mu</math>M</b>  |  |  |

|                                                                                  |                                                 |                             |
|----------------------------------------------------------------------------------|-------------------------------------------------|-----------------------------|
|  | <b>ASTER ANALYTICS RESEARCH INSTITUTE, PUNE</b> |                             |
| <b>CELL LINE STUDY</b>                                                           |                                                 |                             |
| <b>Report No.</b>                                                                | AARI/IVCL/02/2024-25                            |                             |
| <b>Version No.</b>                                                               | 01                                              | <b>RESTRICTED DOCUMENTS</b> |
| <b>Cell Line Study</b>                                                           |                                                 |                             |

|                             |                                                                                     |                                                                                      |
|-----------------------------|-------------------------------------------------------------------------------------|--------------------------------------------------------------------------------------|
| <b>25 <math>\mu</math>M</b> |    |    |
| <b>50 <math>\mu</math>M</b> |   |   |
| <b>75 <math>\mu</math>M</b> |  |  |

|                                                                                  |                                                 |                             |
|----------------------------------------------------------------------------------|-------------------------------------------------|-----------------------------|
|  | <b>ASTER ANALYTICS RESEARCH INSTITUTE, PUNE</b> |                             |
| <b>CELL LINE STUDY</b>                                                           |                                                 |                             |
| <b>Report No.</b>                                                                | AARI/IVCL/02/2024-25                            |                             |
| <b>Version No.</b>                                                               | 01                                              | <b>RESTRICTED DOCUMENTS</b> |
| <b>Cell Line Study</b>                                                           |                                                 |                             |

|                              |                                                                                   |                                                                                    |
|------------------------------|-----------------------------------------------------------------------------------|------------------------------------------------------------------------------------|
| <b>100 <math>\mu</math>M</b> | 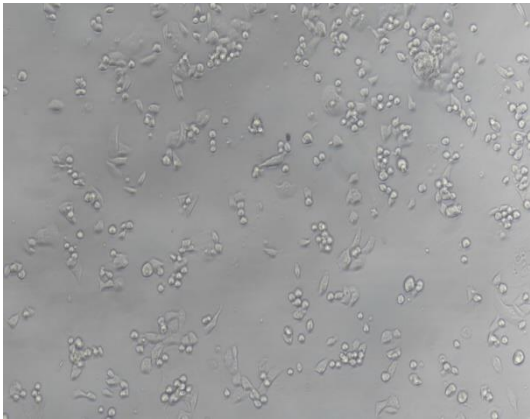 |  |
|------------------------------|-----------------------------------------------------------------------------------|------------------------------------------------------------------------------------|

**Figure 2. Morphological Observations of C25 Epi-Kavaratamide A Treated Wells**

## 2. Kavaratamide A

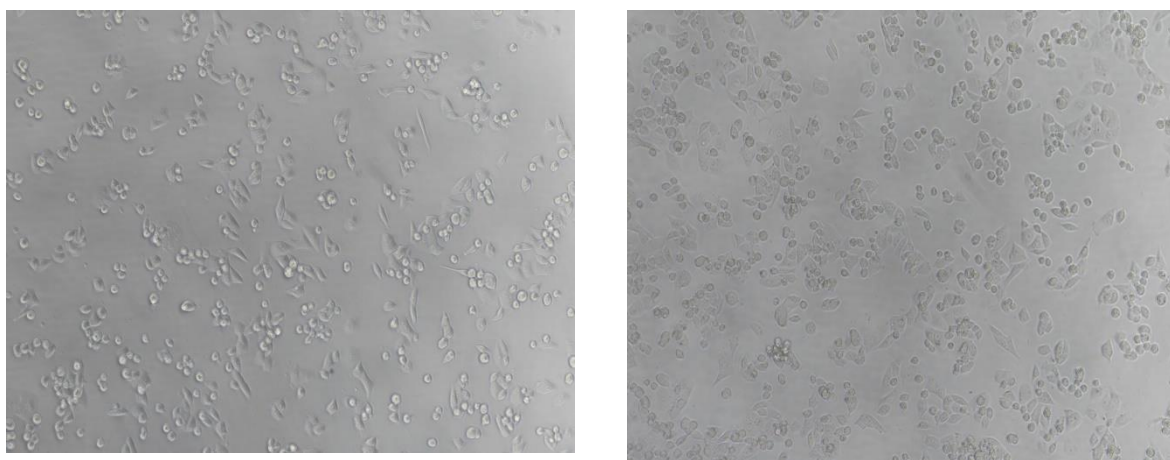

**Figure 3. Morphological Observations of Control Well of Kavaratamide A**



|                                                                                  |                                                 |                             |
|----------------------------------------------------------------------------------|-------------------------------------------------|-----------------------------|
|  | <b>ASTER ANALYTICS RESEARCH INSTITUTE, PUNE</b> |                             |
| <b>CELL LINE STUDY</b>                                                           |                                                 |                             |
| <b>Report No.</b>                                                                | AARI/IVCL/02/2024-25                            |                             |
| <b>Version No.</b>                                                               | 01                                              | <b>RESTRICTED DOCUMENTS</b> |
| <b>Cell Line Study</b>                                                           |                                                 |                             |

| Dilutions | Kavaratamide A (0 hr)                                                               | Kavaratamide A (24 hrs)                                                              |
|-----------|-------------------------------------------------------------------------------------|--------------------------------------------------------------------------------------|
| 0.01μM    |    |    |
| 0.1 μM    |  |  |

|                                                                                  |                                                 |                             |
|----------------------------------------------------------------------------------|-------------------------------------------------|-----------------------------|
|  | <b>ASTER ANALYTICS RESEARCH INSTITUTE, PUNE</b> |                             |
| <b>CELL LINE STUDY</b>                                                           |                                                 |                             |
| <b>Report No.</b>                                                                | AARI/IVCL/02/2024-25                            |                             |
| <b>Version No.</b>                                                               | 01                                              | <b>RESTRICTED DOCUMENTS</b> |
| <b>Cell Line Study</b>                                                           |                                                 |                             |

|                             |                                                                                     |                                                                                      |
|-----------------------------|-------------------------------------------------------------------------------------|--------------------------------------------------------------------------------------|
| <b>1 <math>\mu</math>M</b>  | 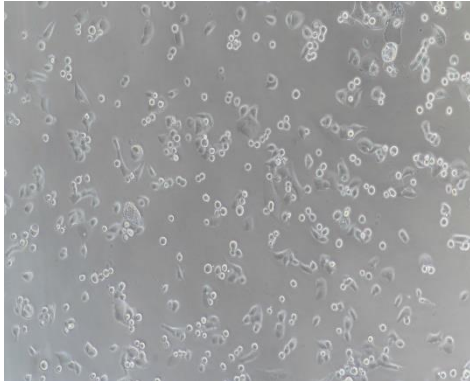   |    |
| <b>10 <math>\mu</math>M</b> |  |  |
| <b>25 <math>\mu</math>M</b> |  |  |

|                                                                                  |                                                 |                             |
|----------------------------------------------------------------------------------|-------------------------------------------------|-----------------------------|
|  | <b>ASTER ANALYTICS RESEARCH INSTITUTE, PUNE</b> |                             |
| <b>CELL LINE STUDY</b>                                                           |                                                 |                             |
| <b>Report No.</b>                                                                | AARI/IVCL/02/2024-25                            |                             |
| <b>Version No.</b>                                                               | 01                                              | <b>RESTRICTED DOCUMENTS</b> |
| <b>Cell Line Study</b>                                                           |                                                 |                             |

|                              |                                                                                     |                                                                                      |
|------------------------------|-------------------------------------------------------------------------------------|--------------------------------------------------------------------------------------|
| <b>50 <math>\mu</math>M</b>  |    |    |
| <b>75 <math>\mu</math>M</b>  |   |   |
| <b>100 <math>\mu</math>M</b> |  |  |

**Figure 4. Morphological Observations of Kavaratamide A Treated Wells**



|                                                                                  |                                                 |                             |
|----------------------------------------------------------------------------------|-------------------------------------------------|-----------------------------|
|  | <b>ASTER ANALYTICS RESEARCH INSTITUTE, PUNE</b> |                             |
| <b>CELL LINE STUDY</b>                                                           |                                                 |                             |
| <b>Report No.</b>                                                                | AARI/IVCL/02/2024-25                            |                             |
| <b>Version No.</b>                                                               | 01                                              | <b>RESTRICTED DOCUMENTS</b> |
| <b>Cell Line Study</b>                                                           |                                                 |                             |

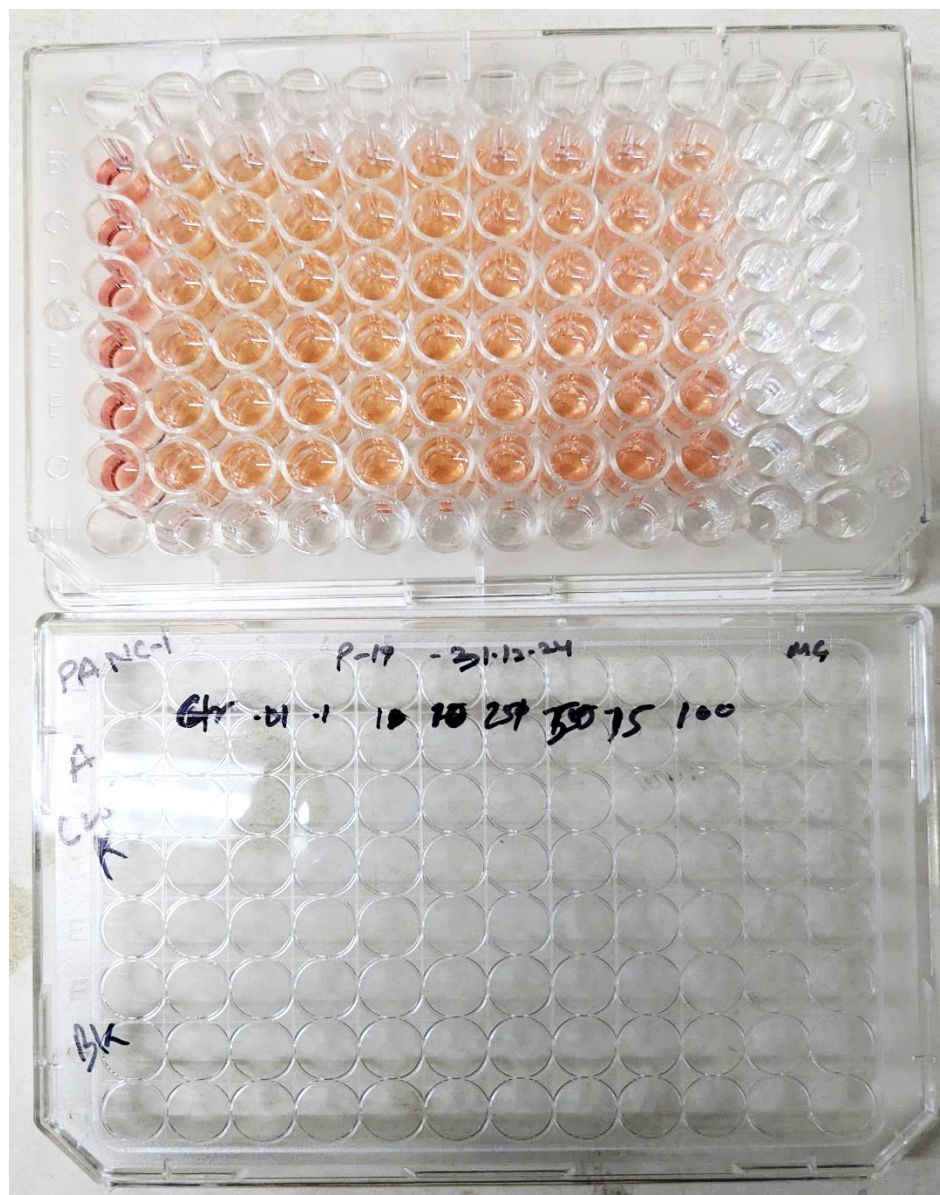

**Figure 5: Microplate Photos of MTT added**

|                                                                                  |                                                 |                             |
|----------------------------------------------------------------------------------|-------------------------------------------------|-----------------------------|
|  | <b>ASTER ANALYTICS RESEARCH INSTITUTE, PUNE</b> |                             |
| <b>CELL LINE STUDY</b>                                                           |                                                 |                             |
| <b>Report No.</b>                                                                | AARI/IVCL/02/2024-25                            |                             |
| <b>Version No.</b>                                                               | 01                                              | <b>RESTRICTED DOCUMENTS</b> |
| <b>Cell Line Study</b>                                                           |                                                 |                             |

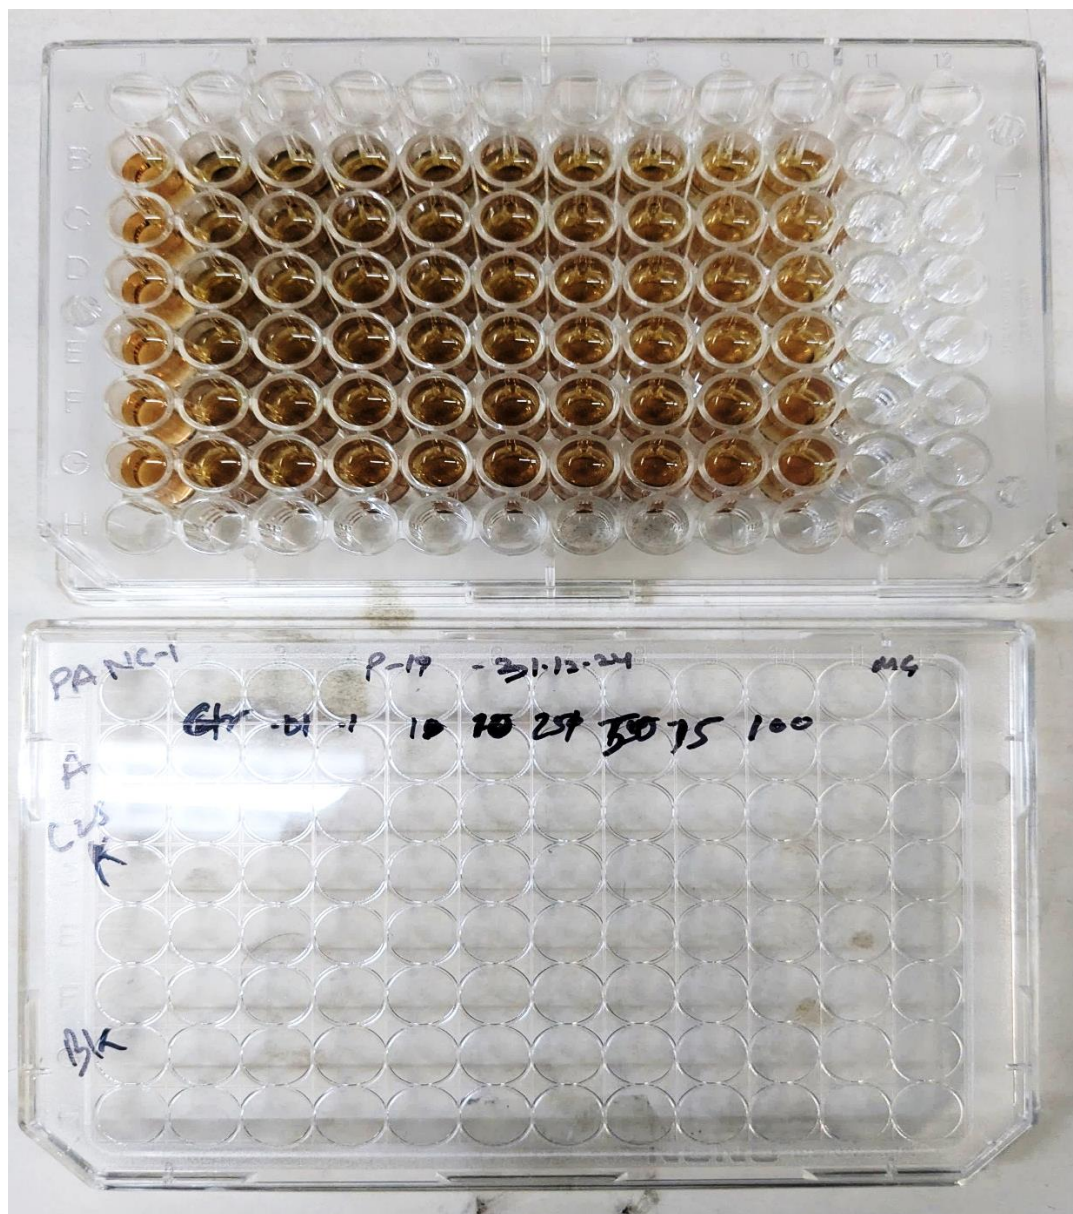

**Figure 5: Microplate Photos of 3.5 hr. MTT added**



|                                                                                   |                      |                                                 |  |
|-----------------------------------------------------------------------------------|----------------------|-------------------------------------------------|--|
|  |                      | <b>ASTER ANALYTICS RESEARCH INSTITUTE, PUNE</b> |  |
| <b>CELL LINE STUDY</b>                                                            |                      |                                                 |  |
| Report No.                                                                        | AARI/IVCL/02/2024-25 |                                                 |  |
| Version No.                                                                       | 01                   | RESTRICTED DOCUMENTS                            |  |
| <b>Cell Line Study</b>                                                            |                      |                                                 |  |

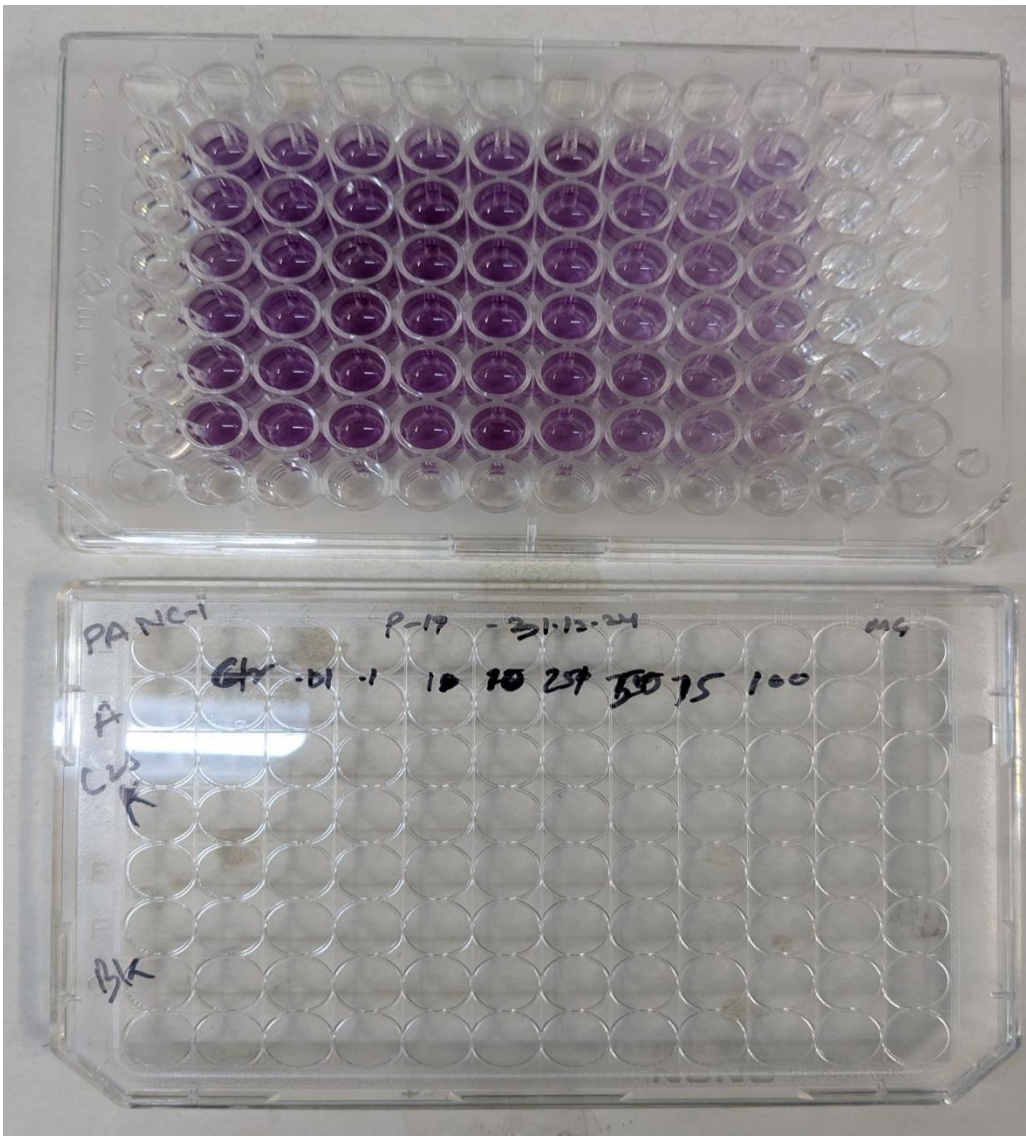

Figure 6. Microplate Photos of Before Reading, After Isopropanol added

|                                                                                  |                                                 |                             |
|----------------------------------------------------------------------------------|-------------------------------------------------|-----------------------------|
|  | <b>ASTER ANALYTICS RESEARCH INSTITUTE, PUNE</b> |                             |
| <b>CELL LINE STUDY</b>                                                           |                                                 |                             |
| <b>Report No.</b>                                                                | AARI/IVCL/02/2024-25                            |                             |
| <b>Version No.</b>                                                               | 01                                              | <b>RESTRICTED DOCUMENTS</b> |
| <b>Cell Line Study</b>                                                           |                                                 |                             |

**Table 1. MTT Results: C25 Epi-Kavaratamide A**

| Concentration (μM)               | Absorbance      |       |       | Average | % Cell Survival |        |        | Average % Cell Survival |
|----------------------------------|-----------------|-------|-------|---------|-----------------|--------|--------|-------------------------|
| CTRL                             | 0.789           | 0.758 | 0.807 | 0.785   | 100.55          | 96.60  | 102.85 | 100.00                  |
| 0.01                             | 0.78            | 0.82  | 0.662 | 0.754   | 99.41           | 104.50 | 84.37  | 96.09                   |
| 0.1                              | 0.813           | 0.788 | 0.936 | 0.846   | 103.61          | 100.42 | 119.29 | 107.77                  |
| 1                                | 0.798           | 0.935 | 0.796 | 0.843   | 101.70          | 119.16 | 101.44 | 107.43                  |
| 10                               | 0.756           | 0.753 | 0.757 | 0.755   | 96.35           | 95.96  | 96.47  | 96.26                   |
| 25                               | 0.834           | 0.671 | 0.624 | 0.710   | 106.29          | 85.51  | 79.52  | 90.44                   |
| 50                               | 0.592           | 0.555 | 0.474 | 0.540   | 75.45           | 70.73  | 60.41  | 68.86                   |
| 75                               | 0.341           | 0.417 | 0.442 | 0.400   | 43.46           | 53.14  | 56.33  | 50.98                   |
| 100                              | 0.352           | 0.34  | 0.383 | 0.358   | 44.86           | 43.33  | 48.81  | 45.67                   |
| <b>Log IC<sub>50</sub> Value</b> | <b>2.619</b>    |       |       |         |                 |        |        |                         |
| <b>IC<sub>50</sub> Value</b>     | <b>415.5 μM</b> |       |       |         |                 |        |        |                         |

**IC<sub>50</sub>=415.5**

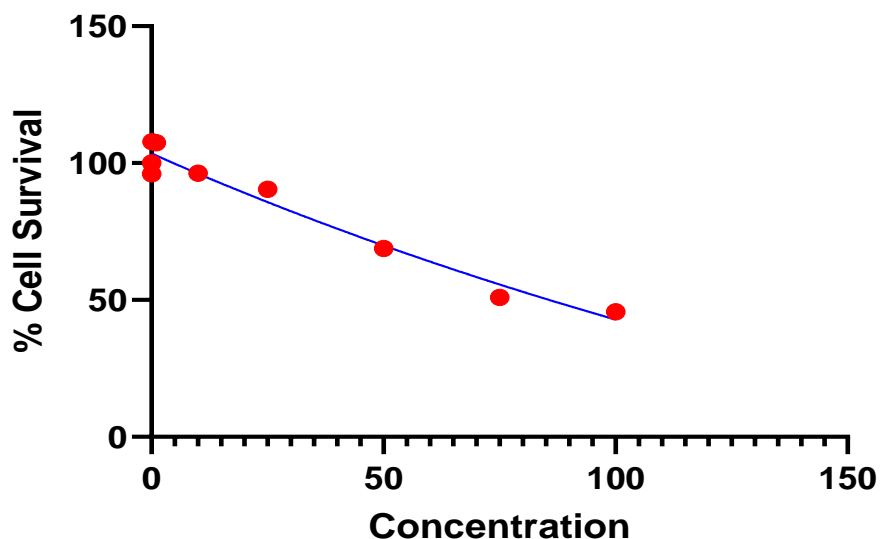

**Figure 7. IC<sub>50</sub> of C25 Epi-Kavaratamide A**

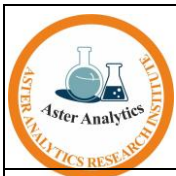

# ASTER ANALYTICS RESEARCH INSTITUTE, PUNE

## CELL LINE STUDY

Report No. AARI/IVCL/02/2024-25

Version No. 01

RESTRICTED DOCUMENTS

## Cell Line Study

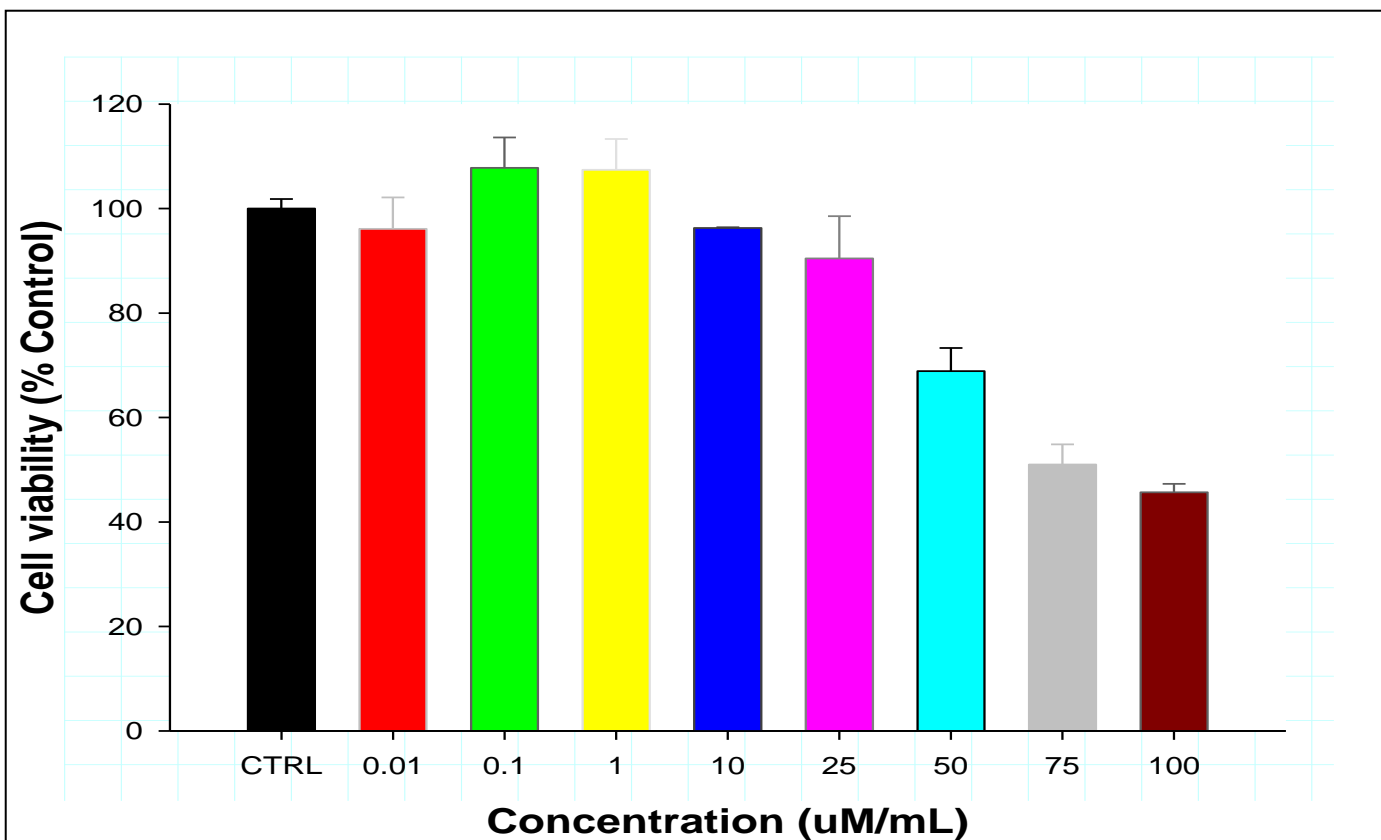

Figure 8. Graph of conc. vs % cell Viability

Table 2. MTT Results: Kavaratamide A

| Concentration (µM) | Absorbance |       |       | Average | % Cell Survival |        |        | Average % Cell Survival |
|--------------------|------------|-------|-------|---------|-----------------|--------|--------|-------------------------|
| CTRL               | 0.815      | 0.757 | 0.805 | 0.792   | 102.86          | 95.54  | 101.60 | 100.00                  |
| 0.01               | 0.7        | 0.775 | 0.753 | 0.743   | 88.35           | 97.81  | 95.04  | 93.73                   |
| 0.1                | 0.902      | 0.825 | 0.775 | 0.834   | 113.84          | 104.12 | 97.81  | 105.26                  |
| 1                  | 0.757      | 0.668 | 0.692 | 0.706   | 95.54           | 84.31  | 87.34  | 89.06                   |
| 10                 | 0.707      | 0.622 | 0.877 | 0.735   | 89.23           | 78.50  | 110.69 | 92.81                   |
| 25                 | 0.592      | 0.633 | 0.573 | 0.599   | 74.72           | 79.89  | 72.32  | 75.64                   |
| 50                 | 0.421      | 0.5   | 0.442 | 0.454   | 53.13           | 63.10  | 55.78  | 57.34                   |

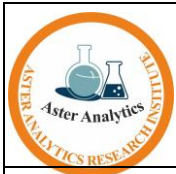

# ASTER ANALYTICS RESEARCH INSTITUTE, PUNE

## CELL LINE STUDY

|                 |                      |                      |
|-----------------|----------------------|----------------------|
| Report No.      | AARI/IVCL/02/2024-25 |                      |
| Version No.     | 01                   | RESTRICTED DOCUMENTS |
| Cell Line Study |                      |                      |

|                |               |       |       |       |       |       |       |       |
|----------------|---------------|-------|-------|-------|-------|-------|-------|-------|
| 75             | 0.325         | 0.405 | 0.296 | 0.342 | 41.02 | 51.11 | 37.36 | 43.16 |
| 100            | 0.346         | 0.286 | 0.271 | 0.301 | 43.67 | 36.10 | 34.20 | 37.99 |
| Log IC50 Value | 2.124         |       |       |       |       |       |       |       |
| IC50 Value     | 133.1 $\mu$ M |       |       |       |       |       |       |       |

IC50=133.1

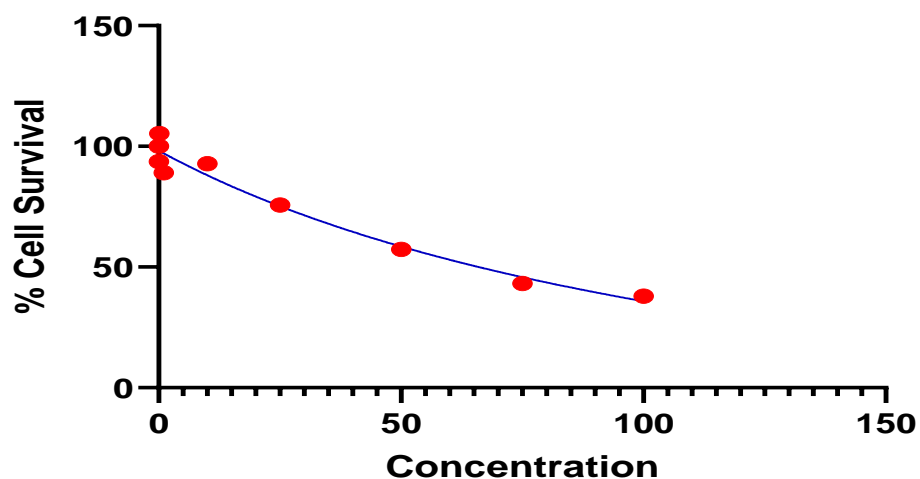

Figure 9. IC50 of Kavaratamide A

|                                                                                  |                                                 |                             |
|----------------------------------------------------------------------------------|-------------------------------------------------|-----------------------------|
|  | <b>ASTER ANALYTICS RESEARCH INSTITUTE, PUNE</b> |                             |
| <b>CELL LINE STUDY</b>                                                           |                                                 |                             |
| <b>Report No.</b>                                                                | AARI/IVCL/02/2024-25                            |                             |
| <b>Version No.</b>                                                               | 01                                              | <b>RESTRICTED DOCUMENTS</b> |
| <b>Cell Line Study</b>                                                           |                                                 |                             |

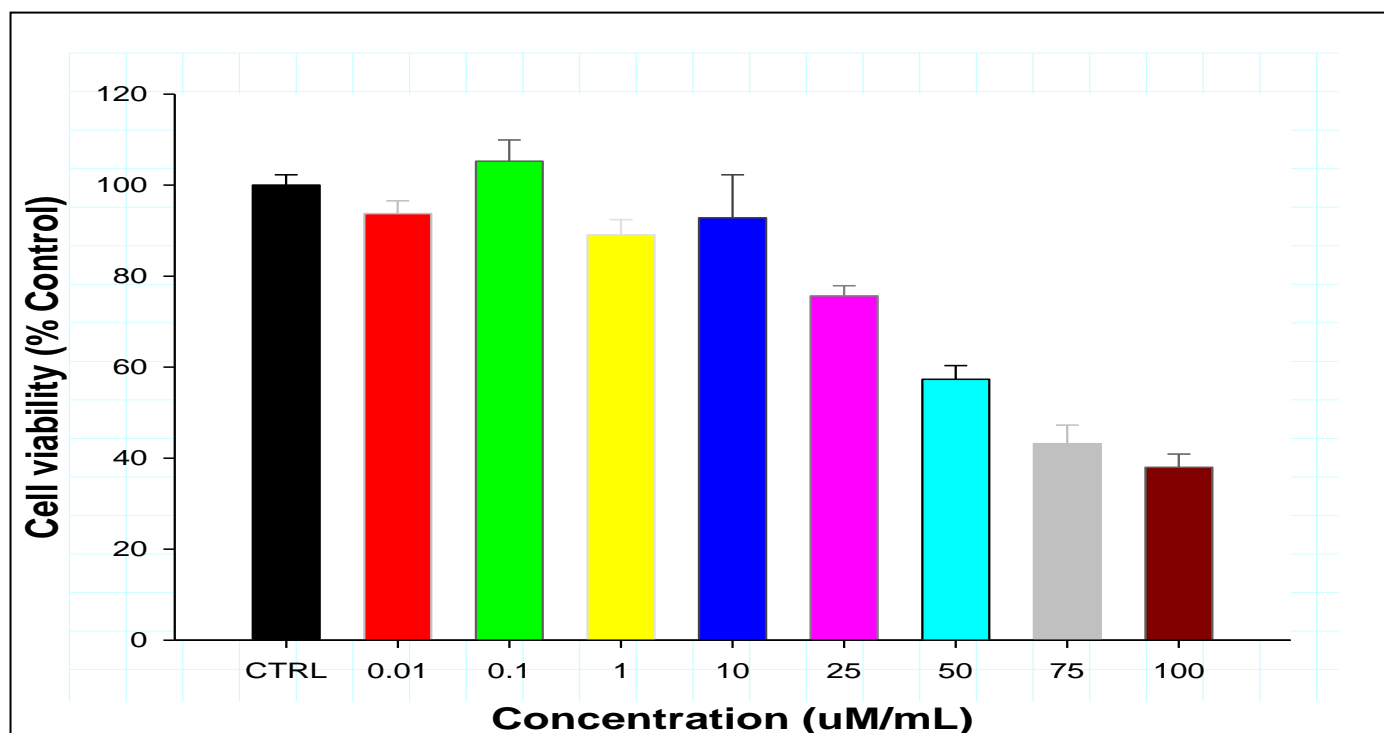

**Figure 10. Graph of conc. vs % cell Viability**

**Table 3. IC50 values of MTT Assay**

| Sr. No. | Test Item              | Log IC50 Value | IC50 Value |
|---------|------------------------|----------------|------------|
| 1.      | C25 Epi-Kavaratamide A | 2.619          | 415.5      |
| 2.      | Kavaratamide A         | 2.124          | 133.1      |

|                                                                                  |                                                 |                             |
|----------------------------------------------------------------------------------|-------------------------------------------------|-----------------------------|
|  | <b>ASTER ANALYTICS RESEARCH INSTITUTE, PUNE</b> |                             |
| <b>CELL LINE STUDY</b>                                                           |                                                 |                             |
| <b>Report No.</b>                                                                | AARI/IVCL/02/2024-25                            |                             |
| <b>Version No.</b>                                                               | 01                                              | <b>RESTRICTED DOCUMENTS</b> |
| <b>Cell Line Study</b>                                                           |                                                 |                             |

## 8. Data Analysis and Report Preparation

GraphPad Prism Ver. 10.00 was used for the statistical analysis. The extracted sheets of statistical analysis are provided along with the report in text format.

Two final copies of final reports are generated. One copy is shared with the Sponsor, and the other copy is submitted to the archives.

Note - After sending a draft report, if no comments are received from the Sponsor within 10 days, the draft report and the raw data shall be archived as such.

## 9. Archives

All original raw data, final report and all electronic files generated will be retained in archives. Thereafter, the archived material will be either destroyed or stored for an extended period as per written consent from the sponsor.

## 10. Study Plan Amendment and Deviations

No study plan amendments or deviations occurred during the study.

## **6. $^1\text{H}$ , $^{13}\text{C}$ and DEPT spectra**

**(S)-Undec-1-en-4-ol (11):**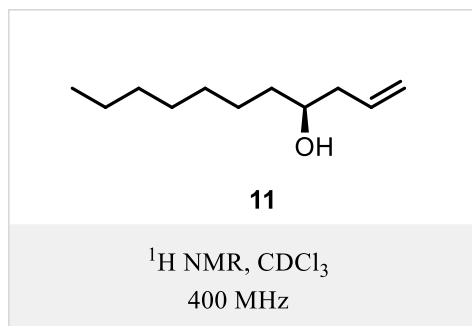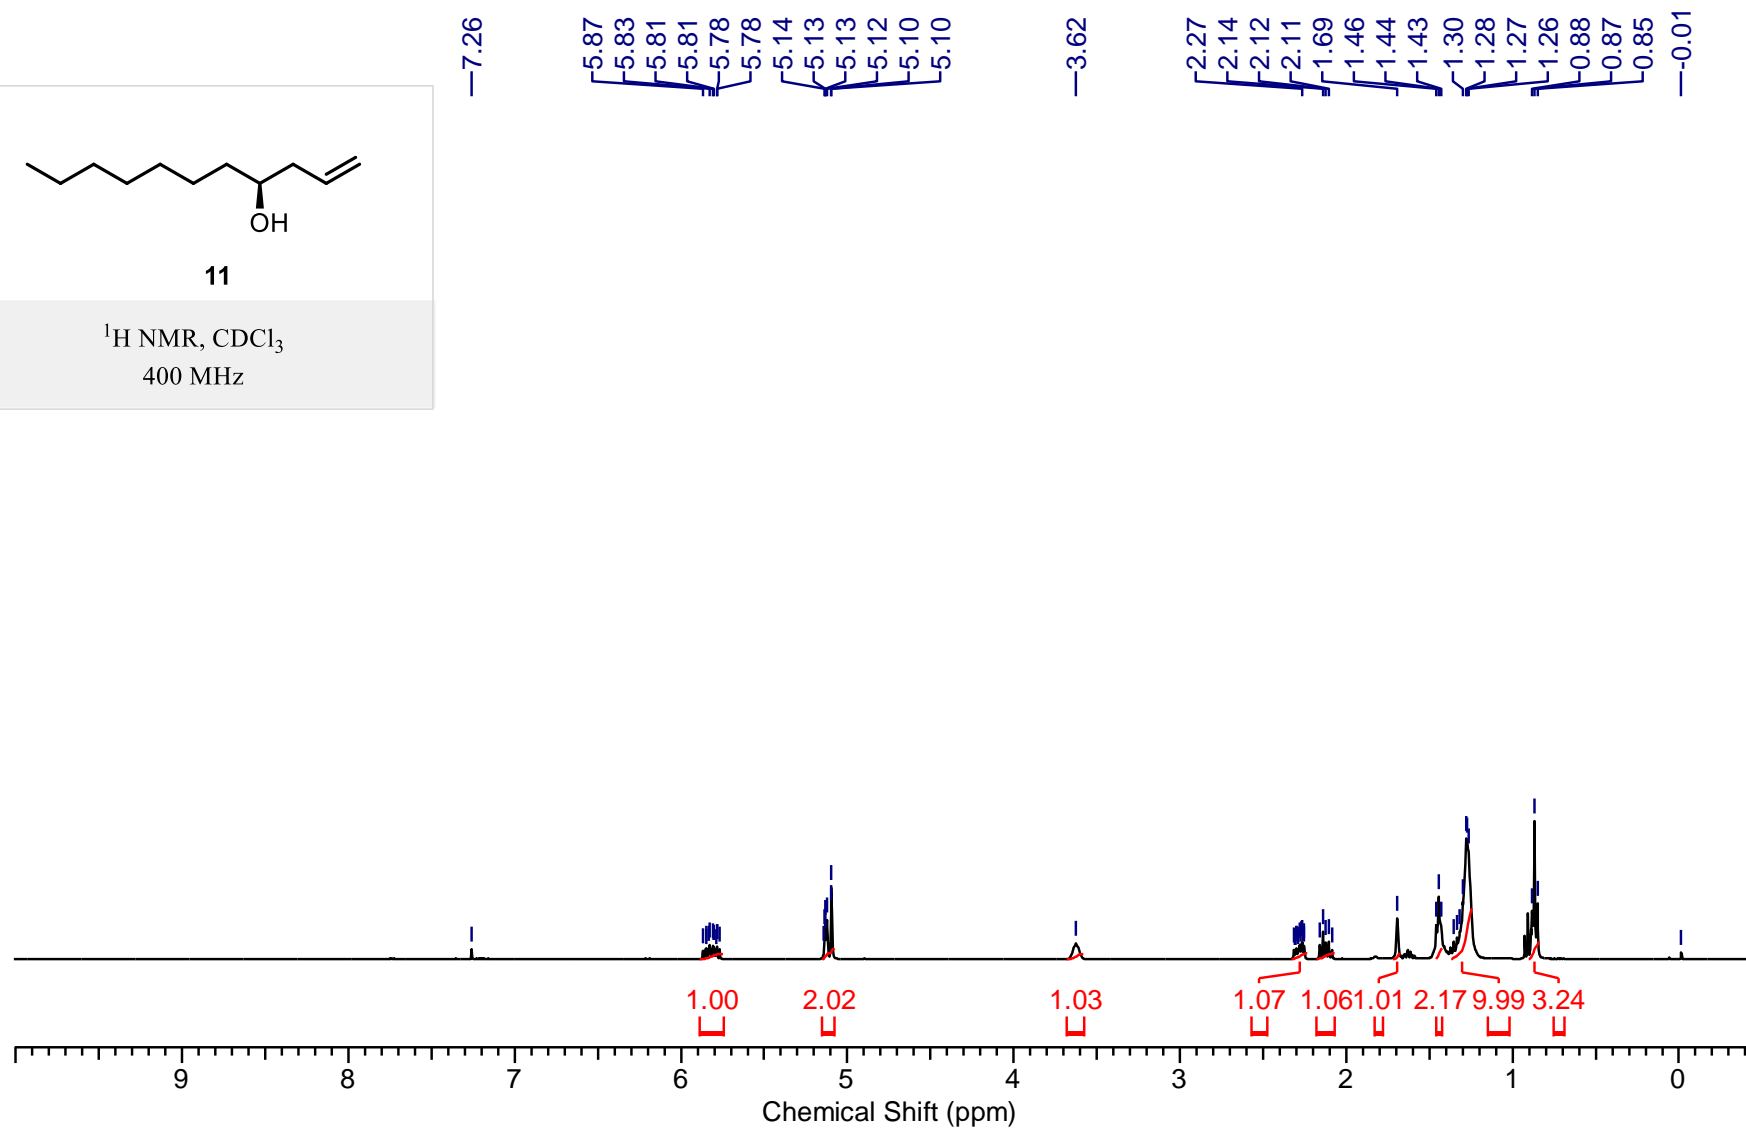



**(S)-Undec-1-en-4-ol (11):**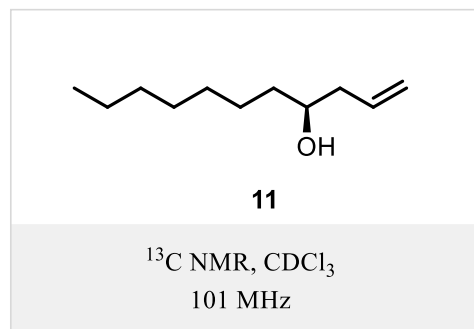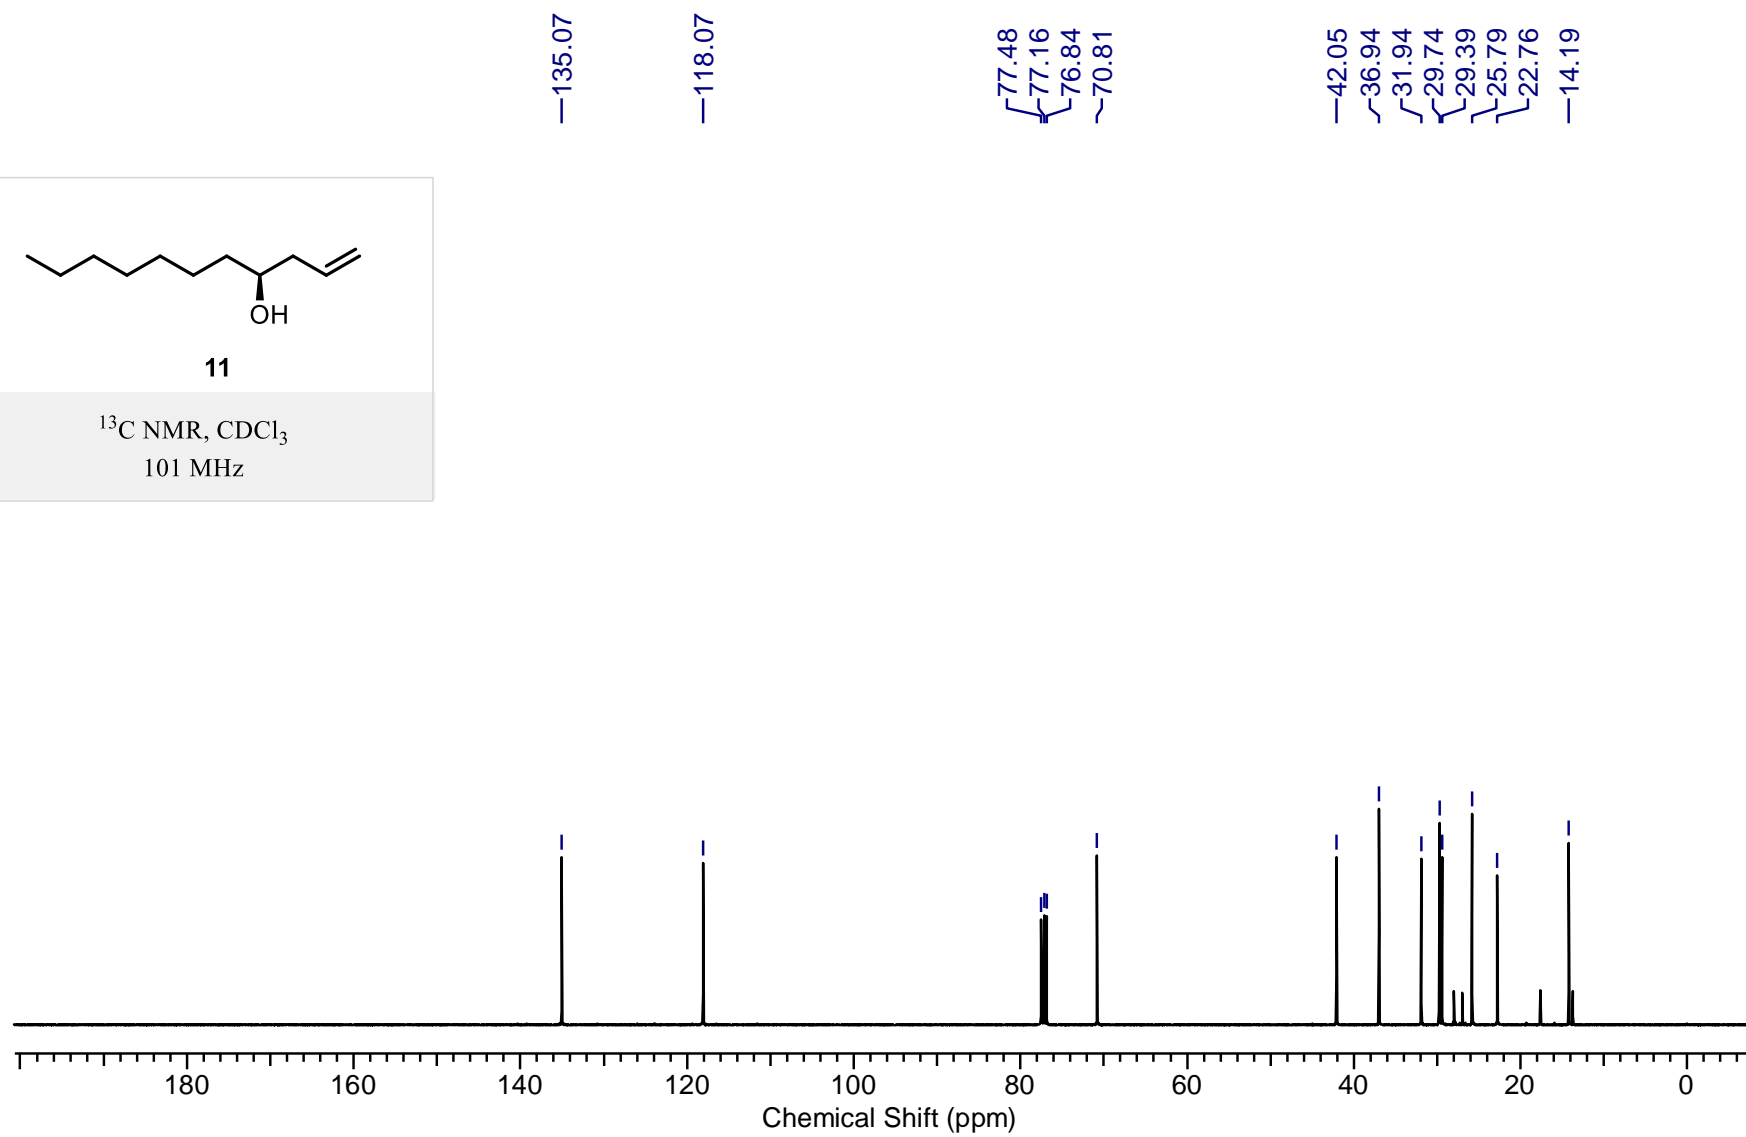

**(S)-tert-Butyldimethyl(undec-1-en-4-yloxy)silane (12):**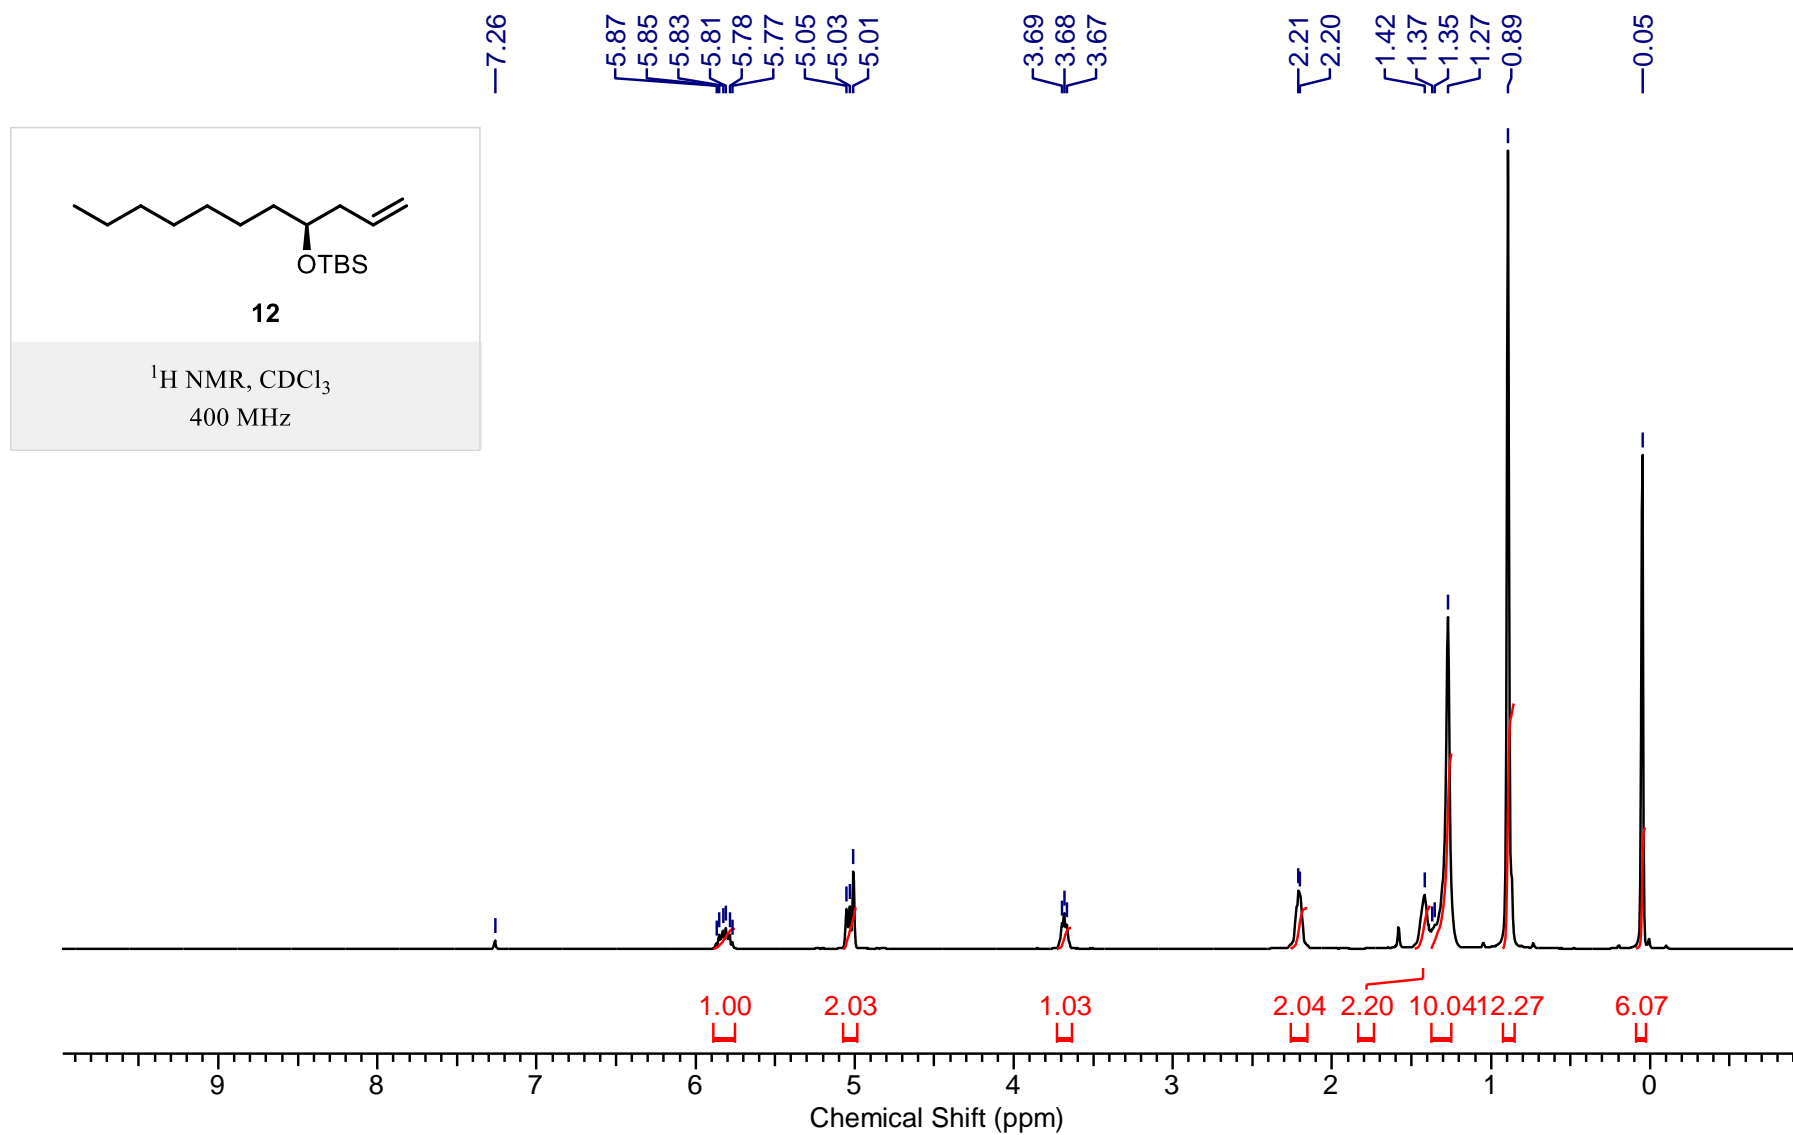

**(S)-tert-Butyldimethyl(undec-1-en-4-yloxy)silane (12):**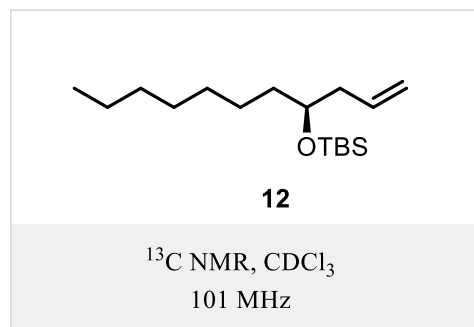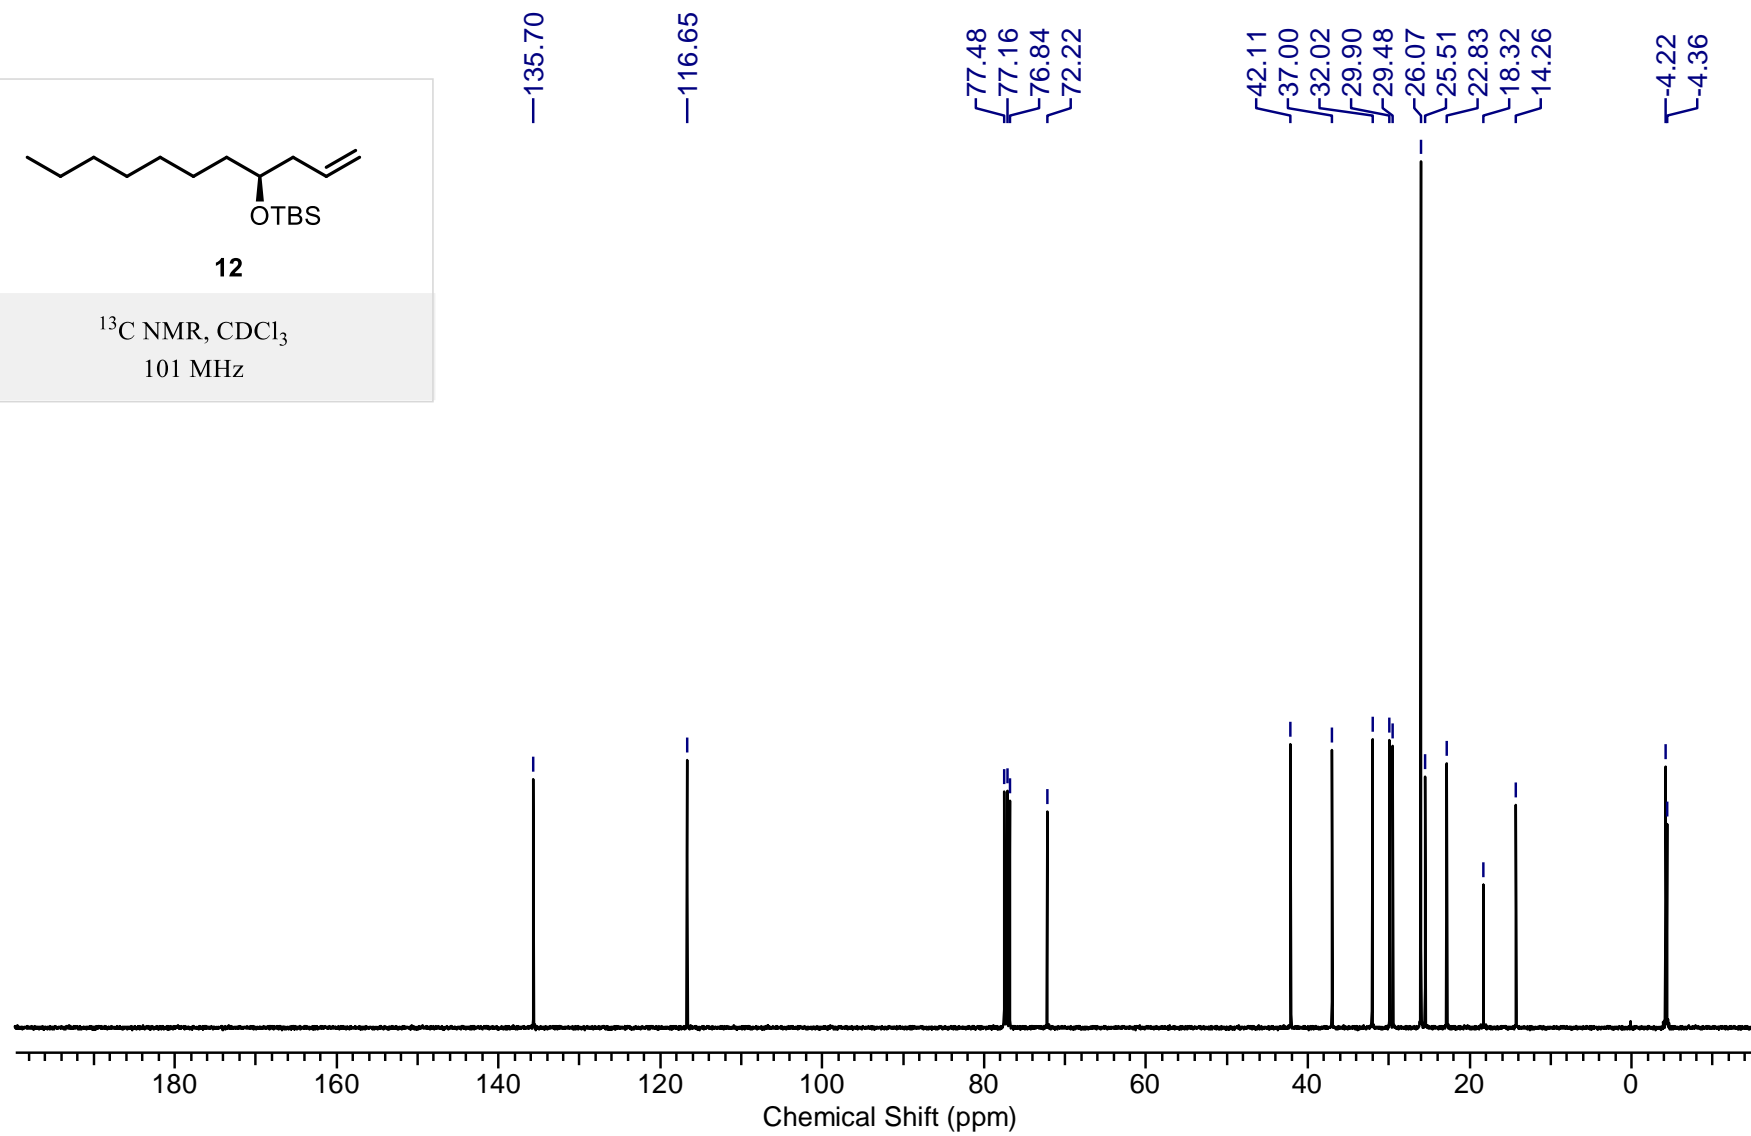

**(S)-3-((*tert*-Butyldimethylsilyl)oxy)decanoic acid (3):**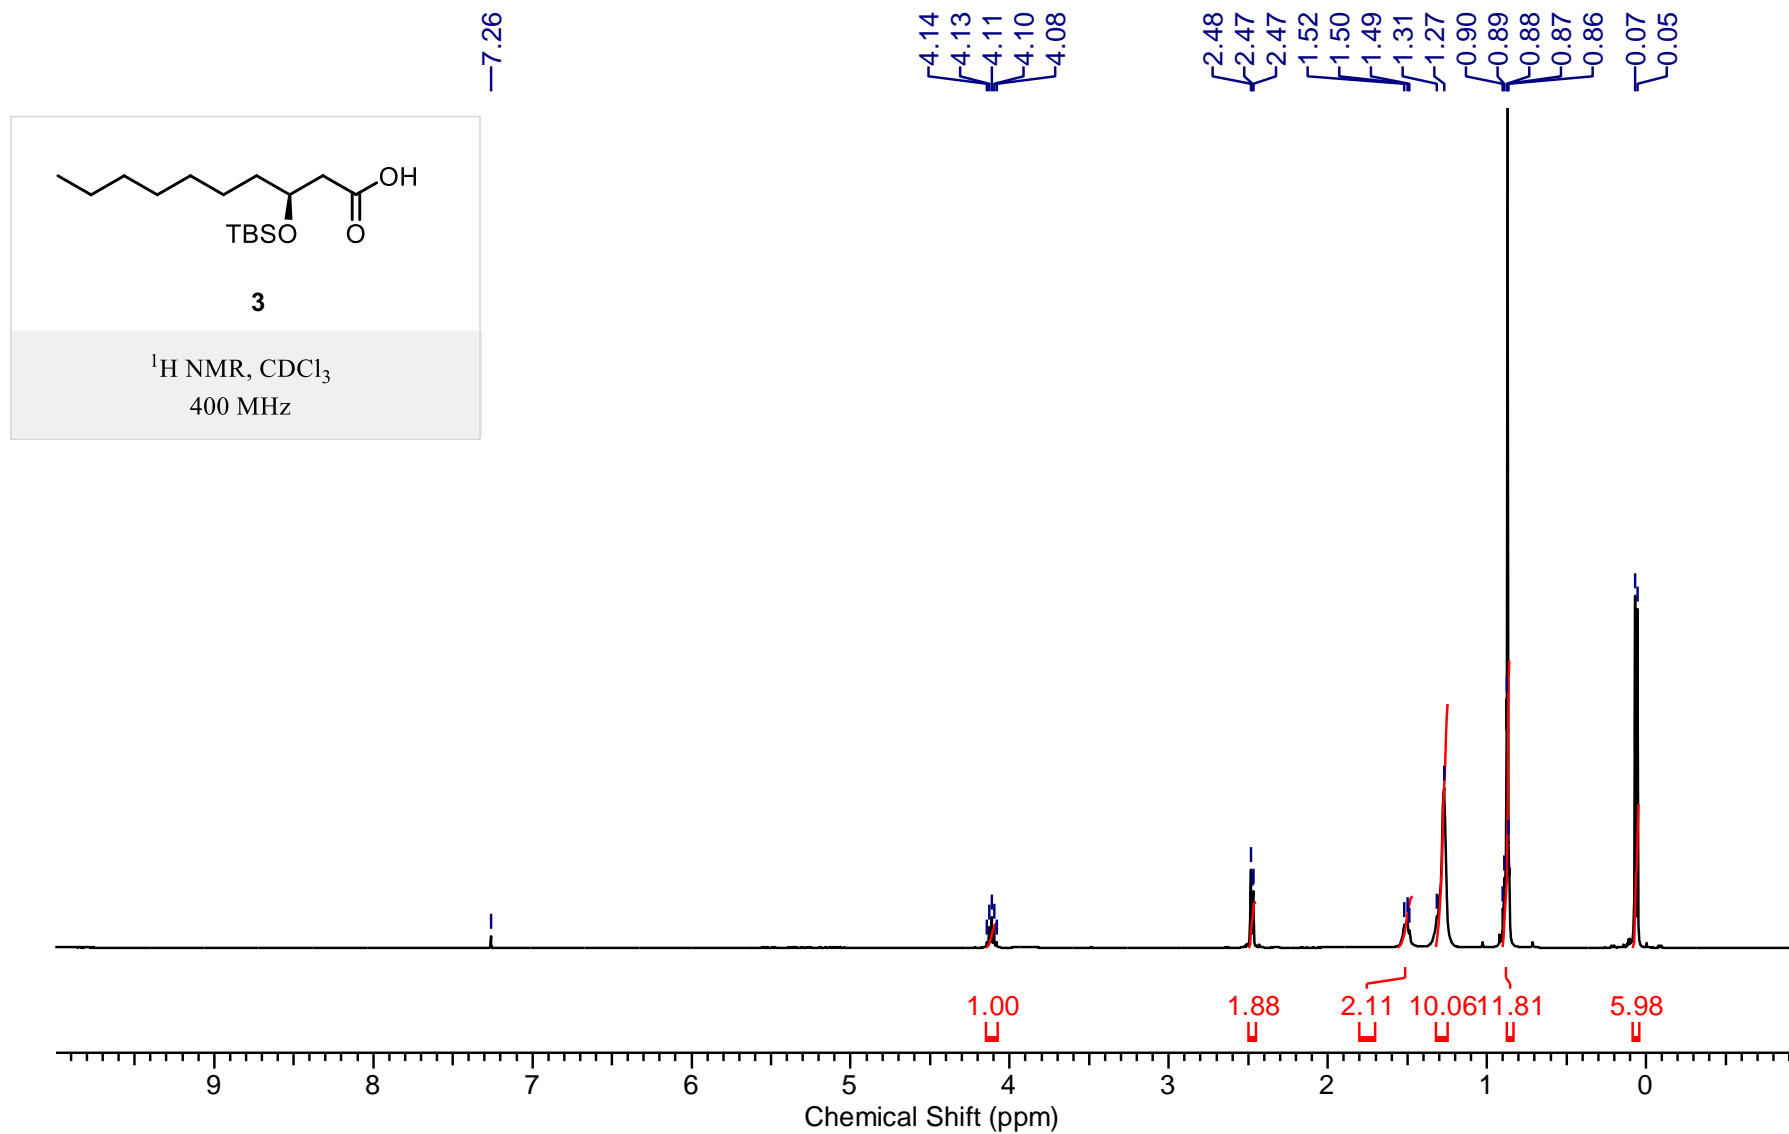

**(S)-3-((*tert*-Butyldimethylsilyl)oxy)decanoic acid (3):**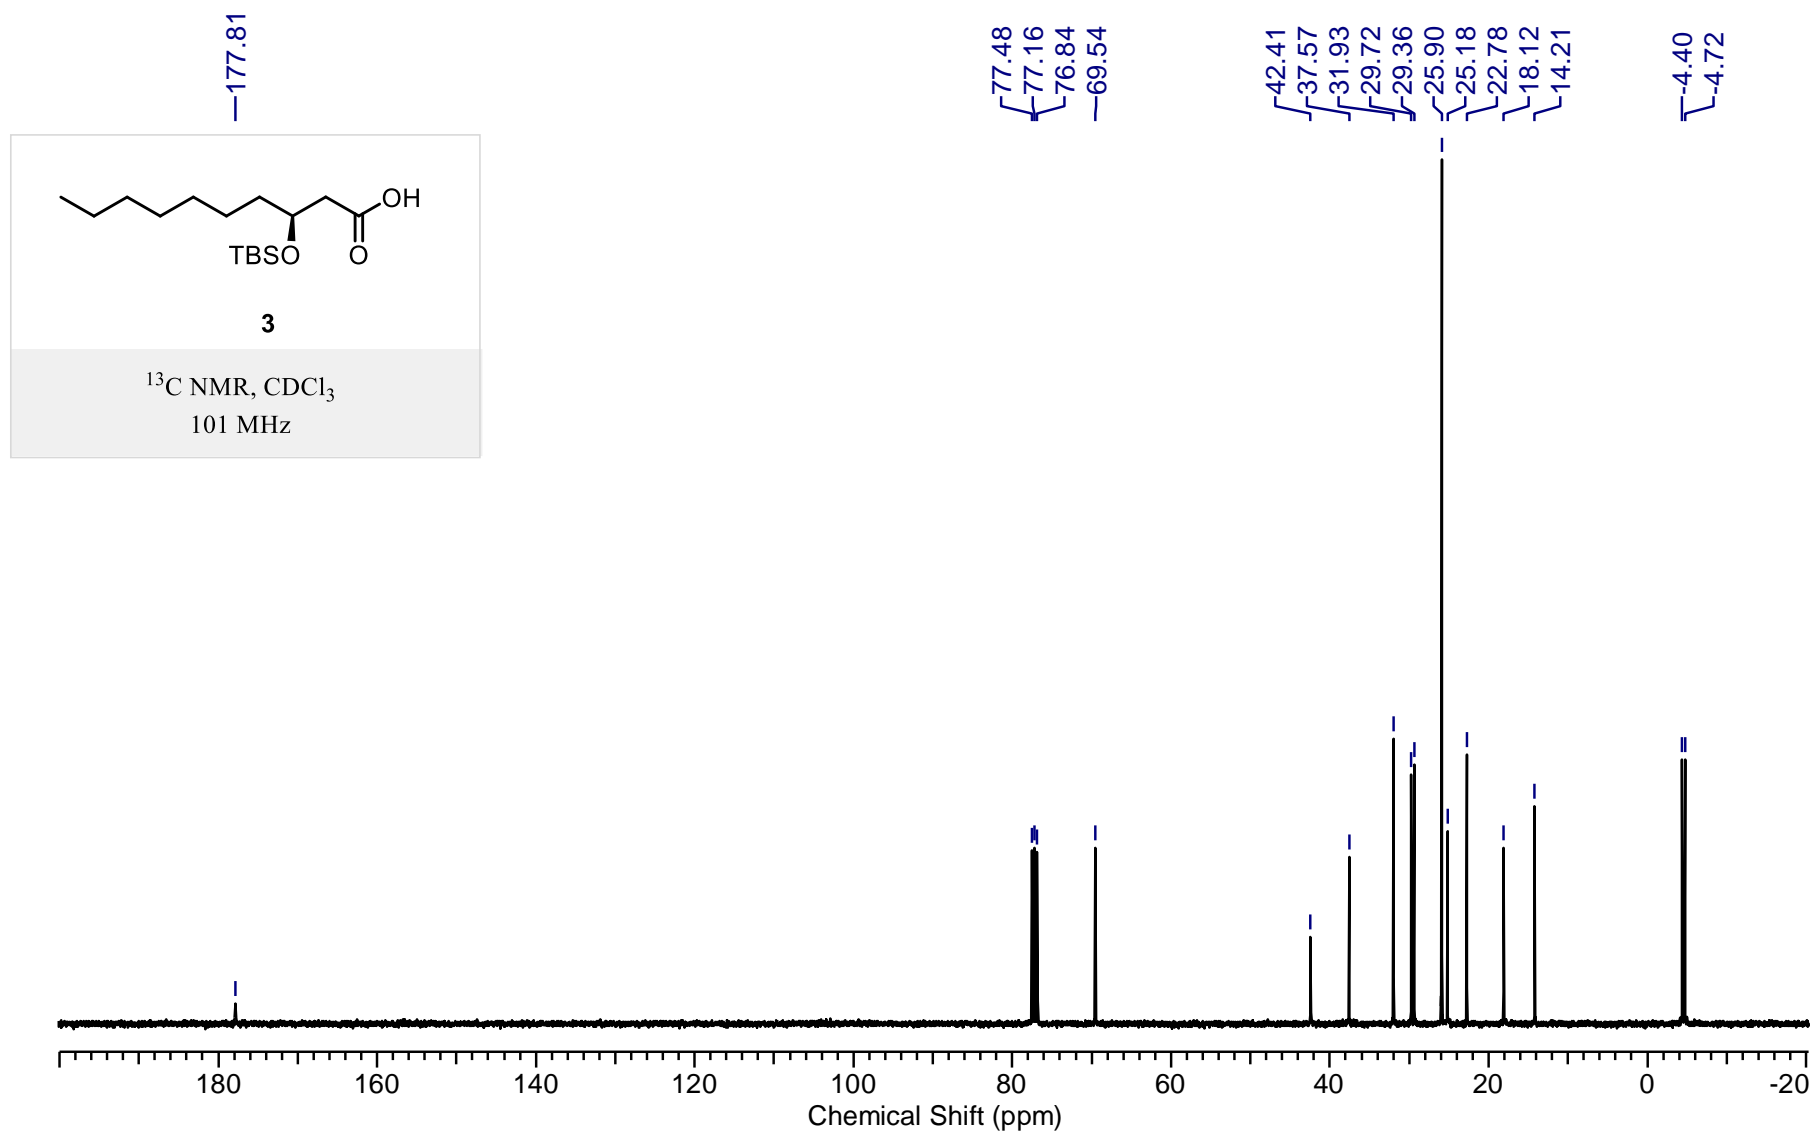

**(R)-Undec-1-en-4-ol (11'):**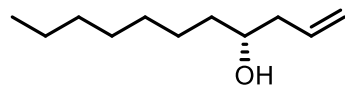**11'**<sup>1</sup>H NMR, CDCl<sub>3</sub>  
400 MHz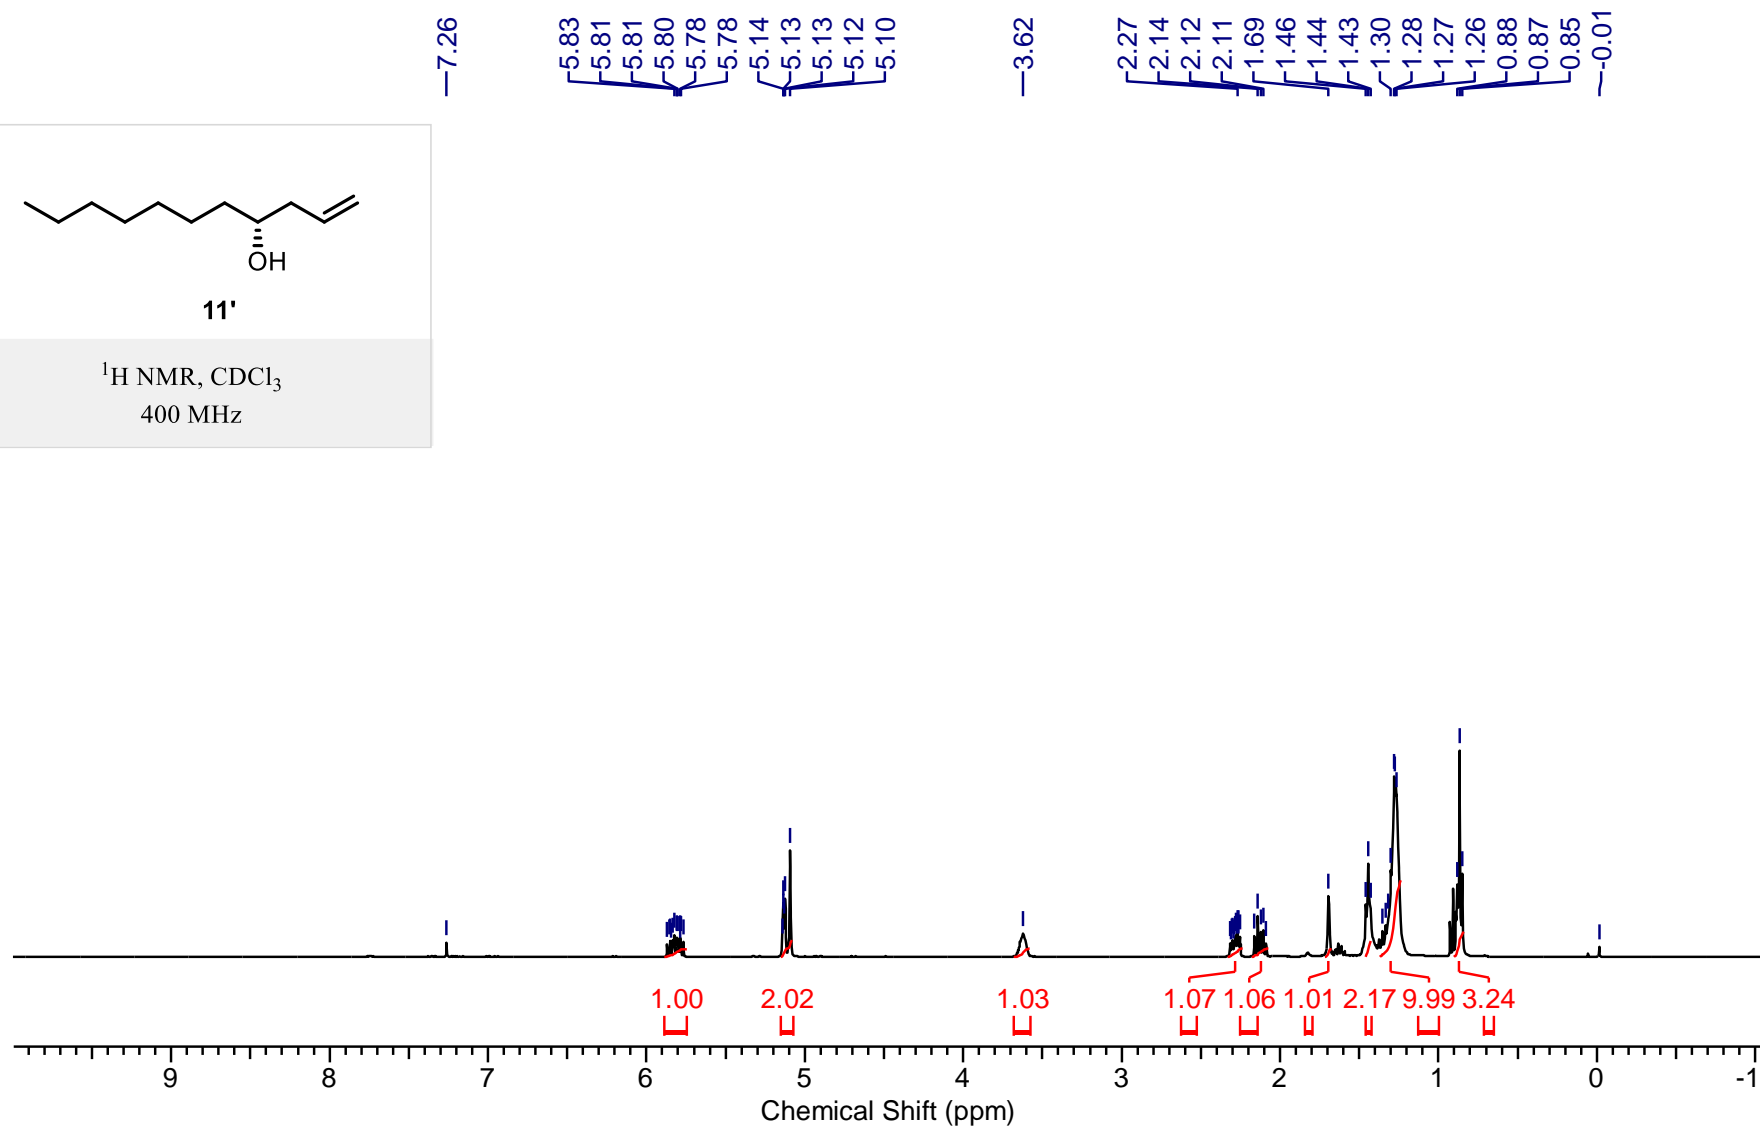

**(R)-Undec-1-en-4-ol (11')**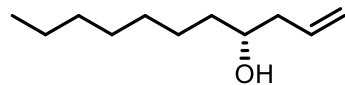**11'**

$^{13}\text{C}$  NMR,  $\text{CDCl}_3$   
101 MHz

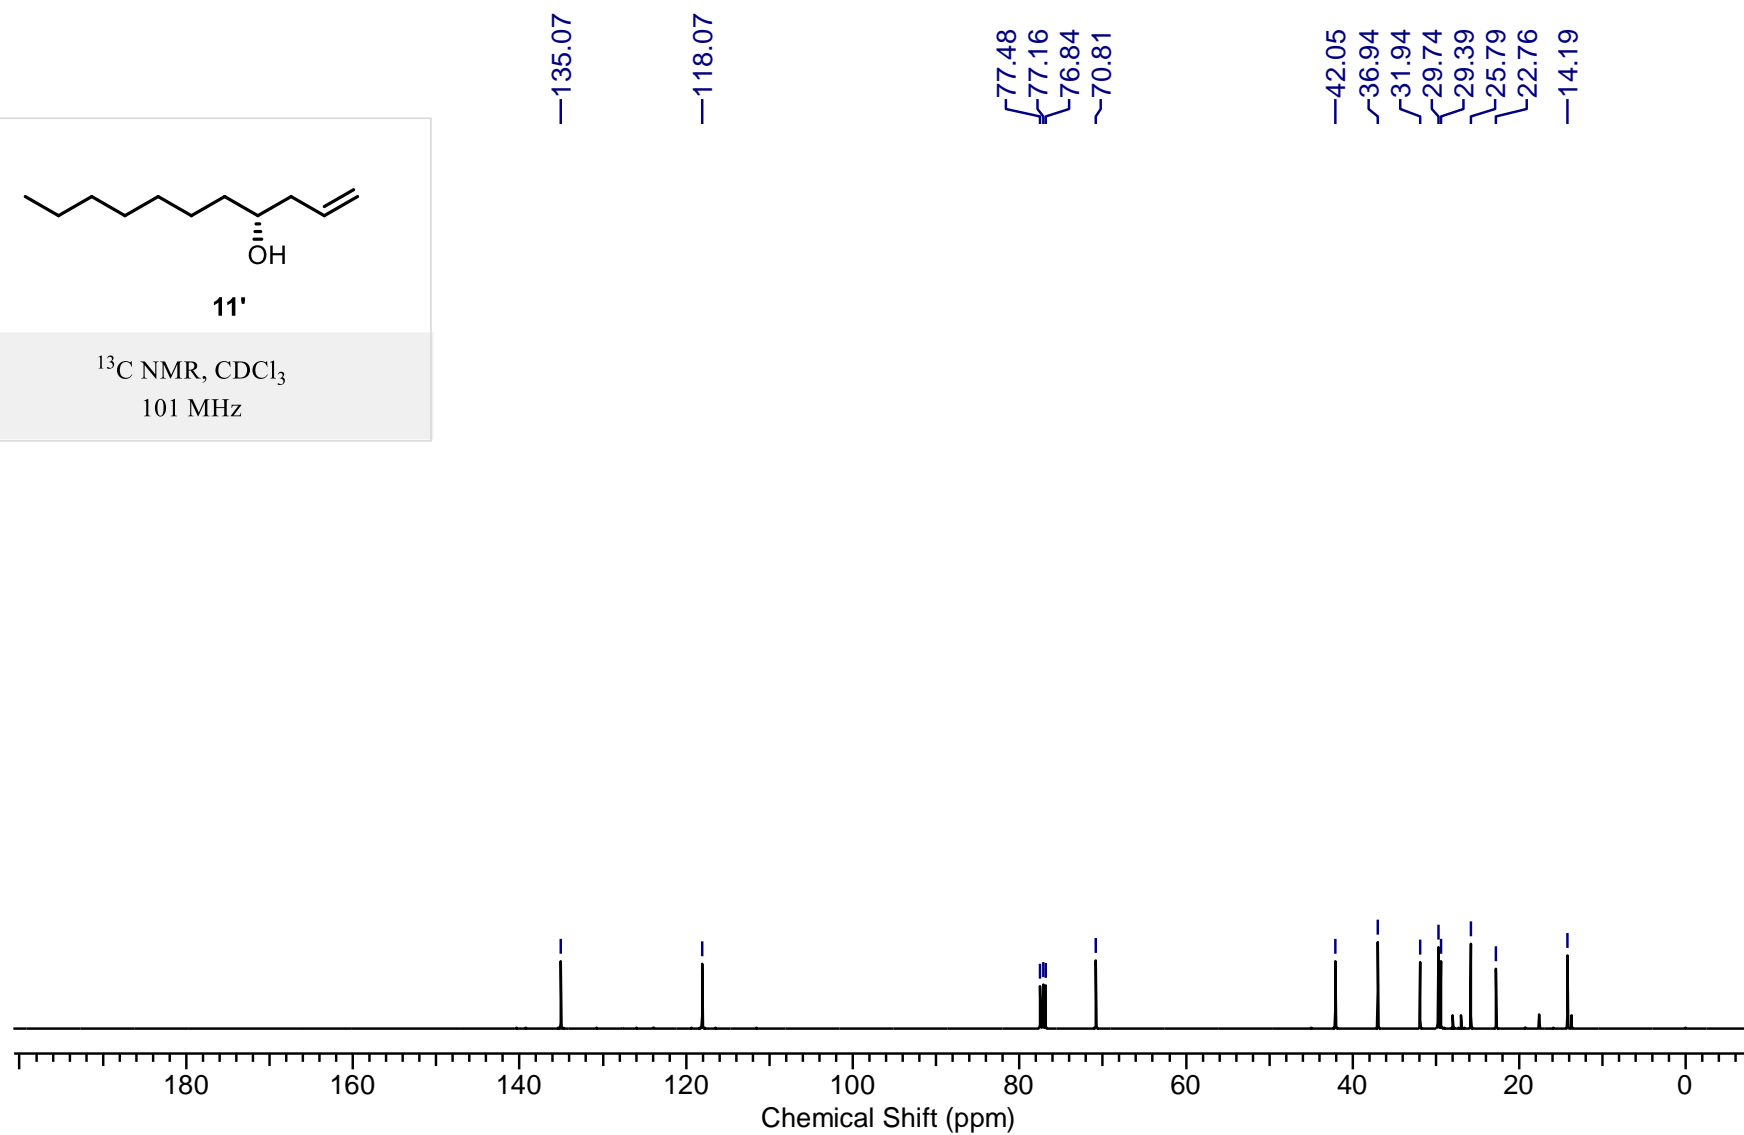

**(*R*)-tert-Butyldimethyl(undec-1-en-4-yloxy)silane (12'):**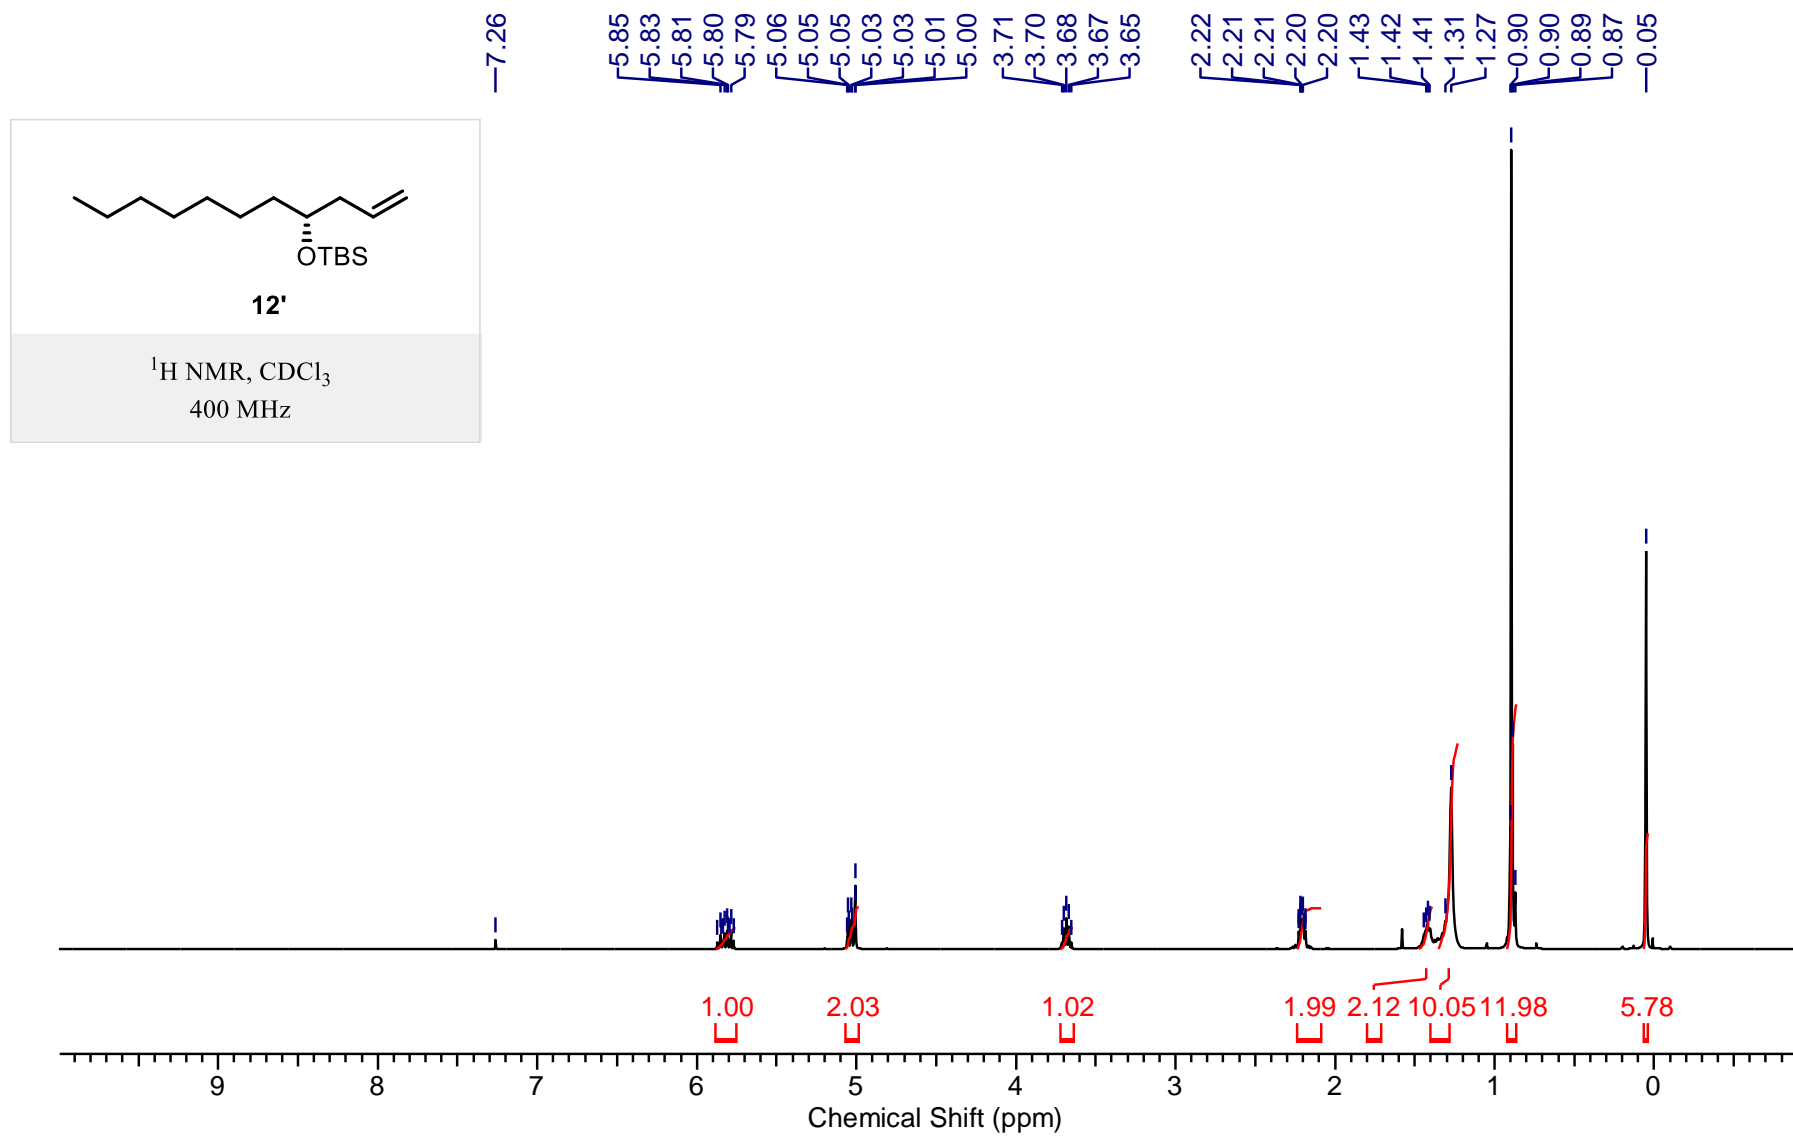



**(*R*)-tert-Butyldimethyl(undec-1-en-4-yloxy)silane (12'):**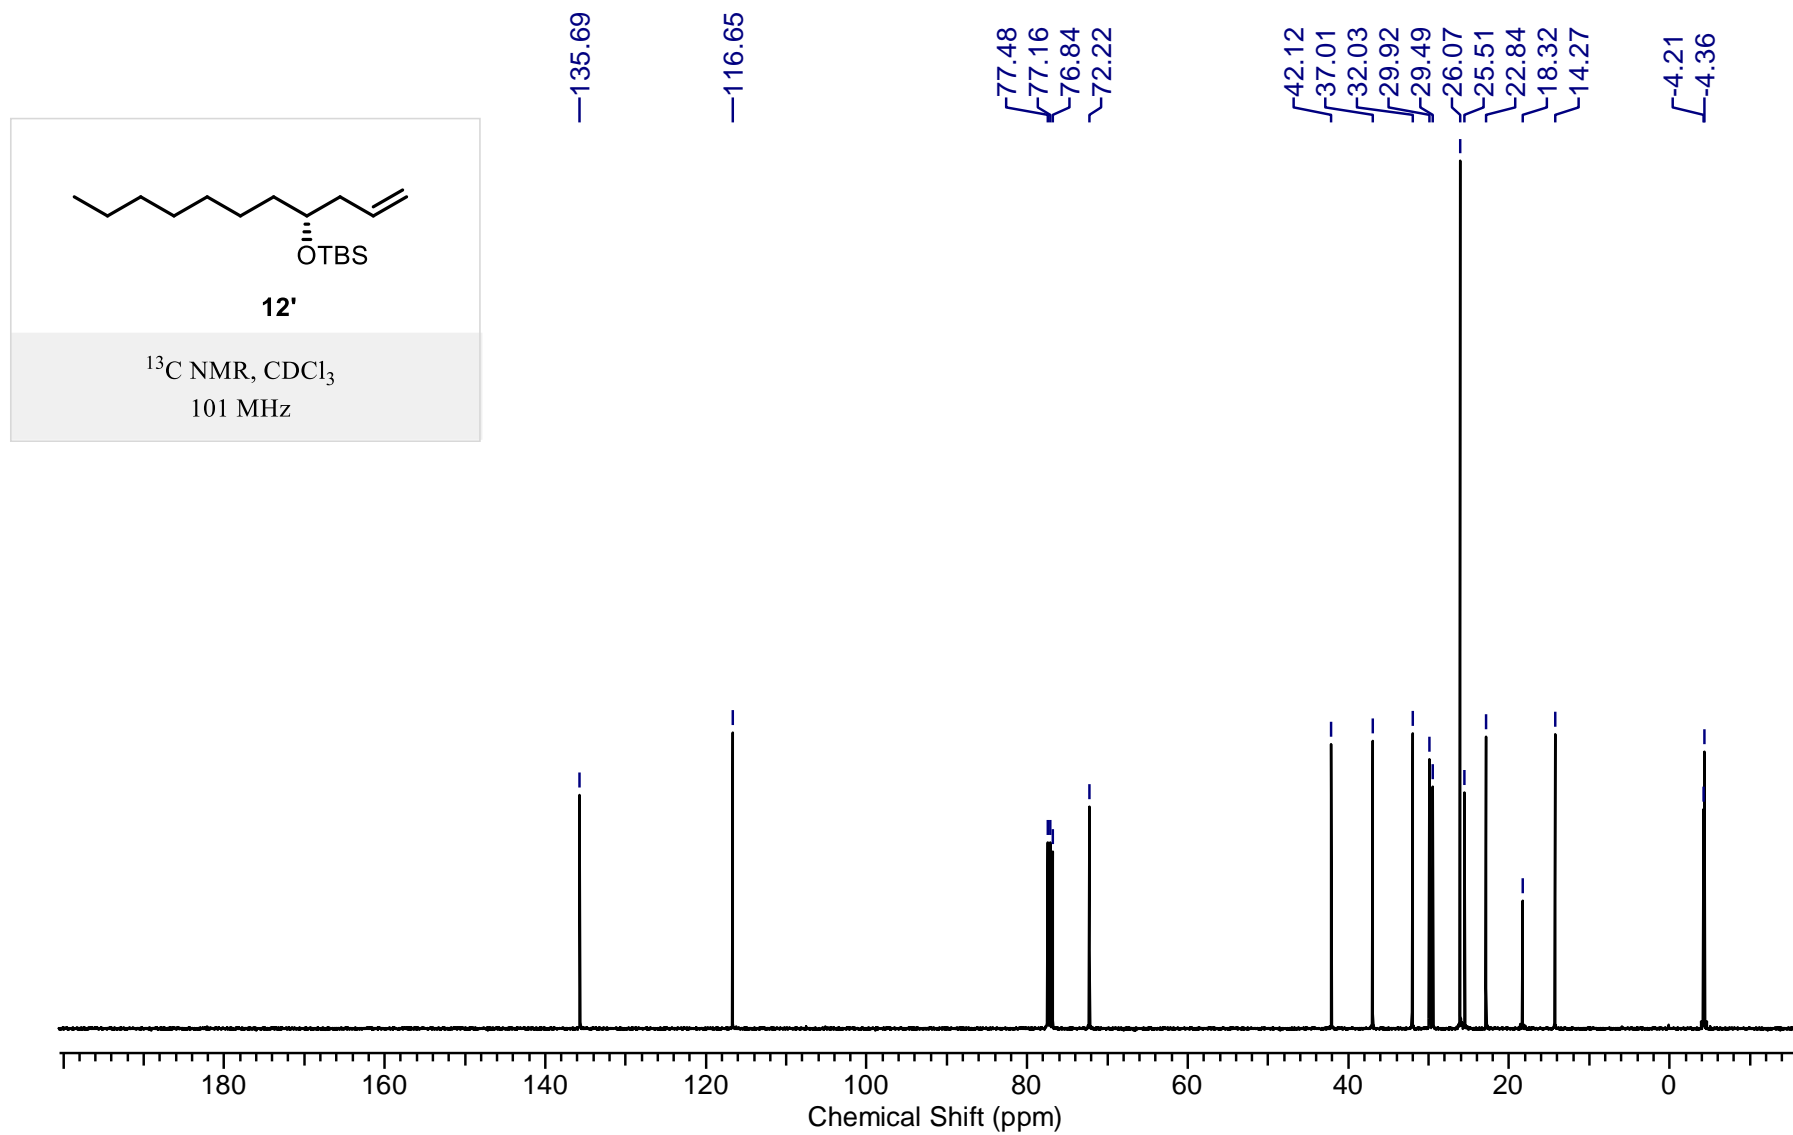

**(R)-3-((tert-Butyldimethylsilyl)oxy)decanoic acid (3'):**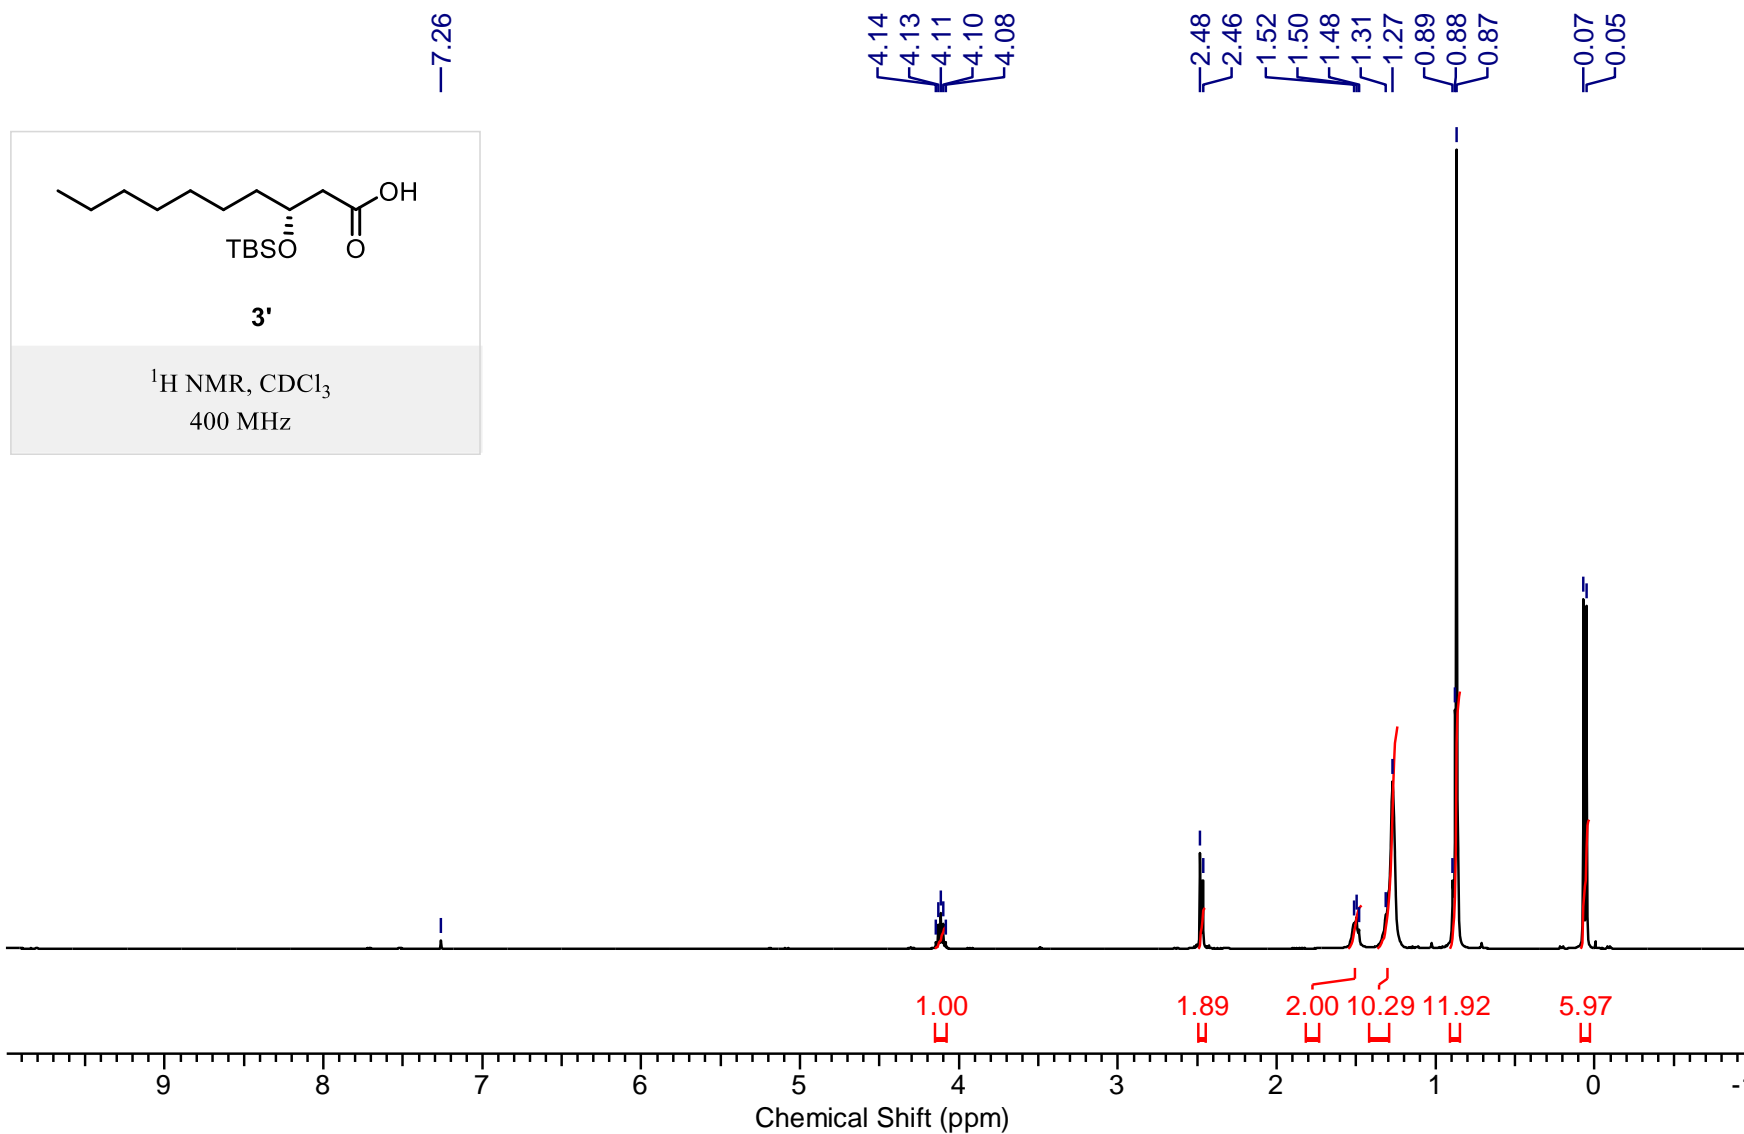

**(R)-3-((tert-Butyldimethylsilyl)oxy)decanoic acid (3')**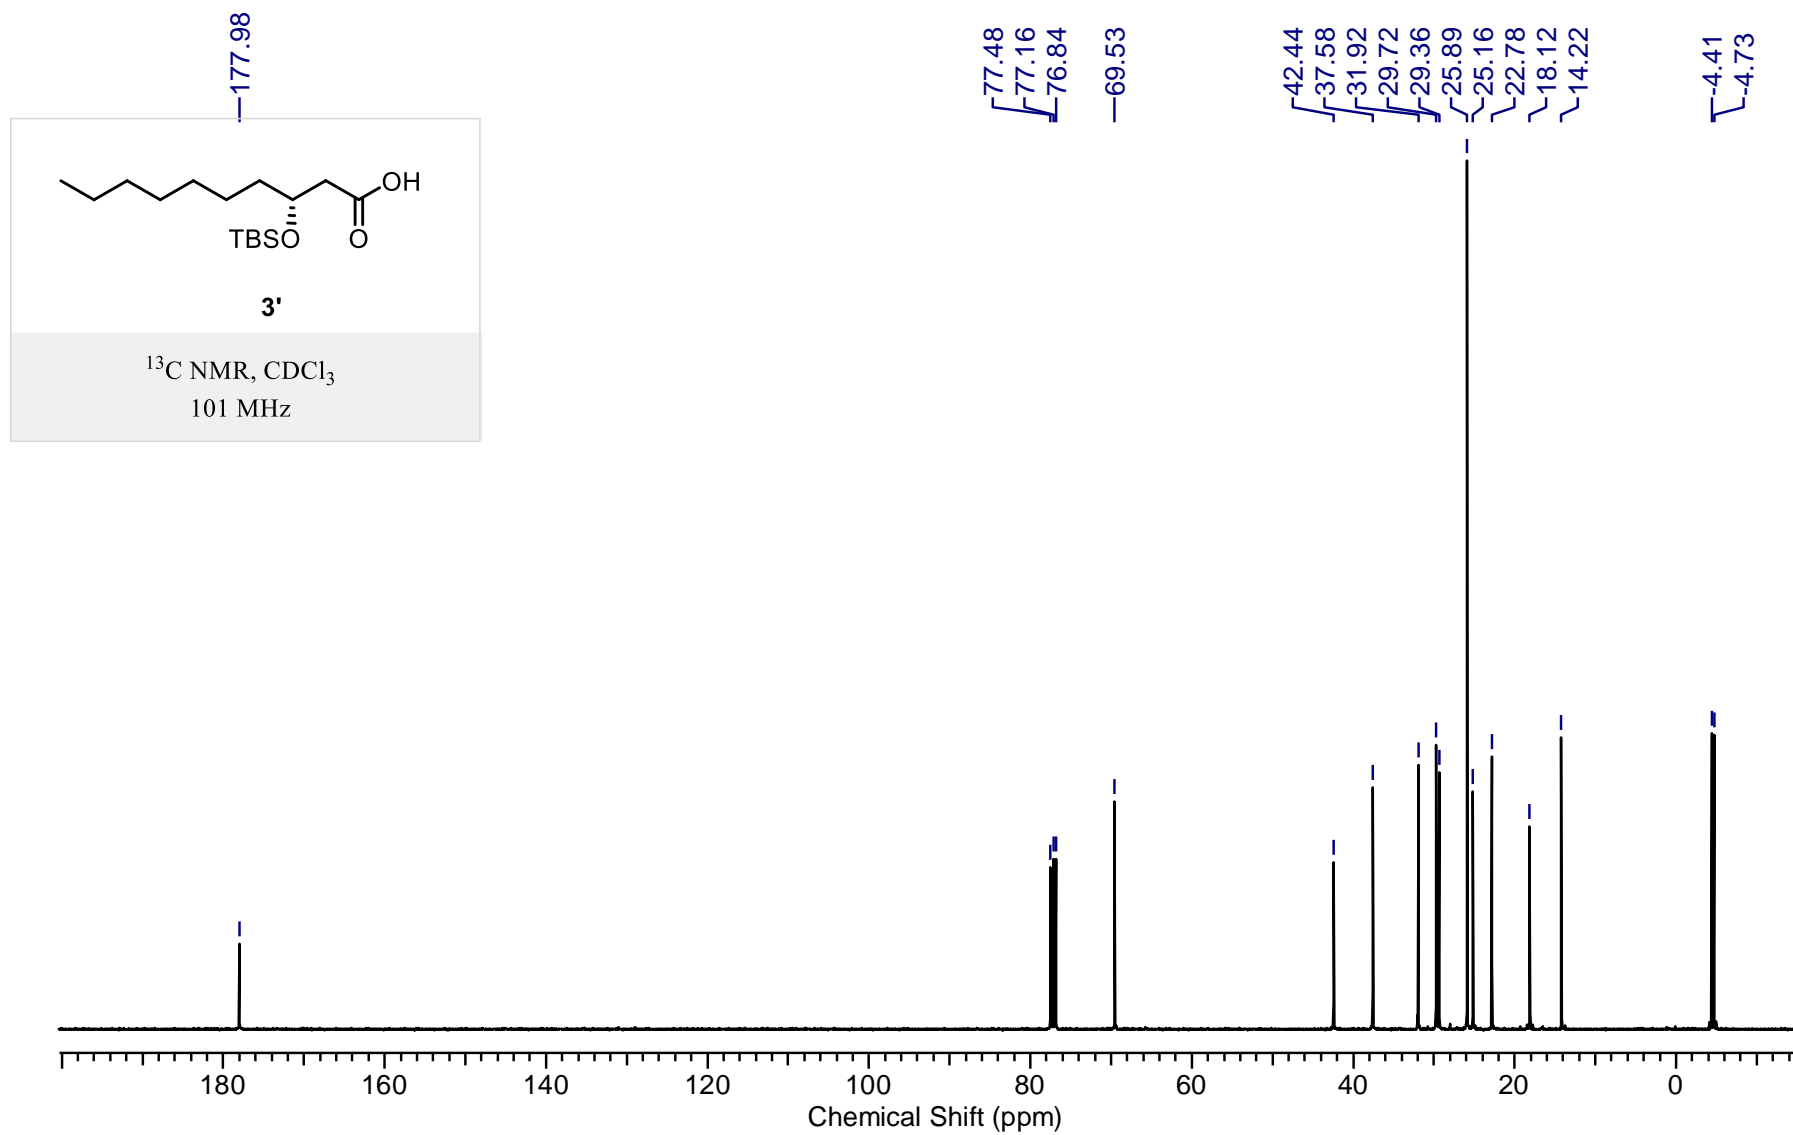

***Tert*-butyl (*S*)-2-isopropyl-3-methoxy-5-oxo-2,5-dihydro-1*H*-pyrrole-1-carboxylate (7):**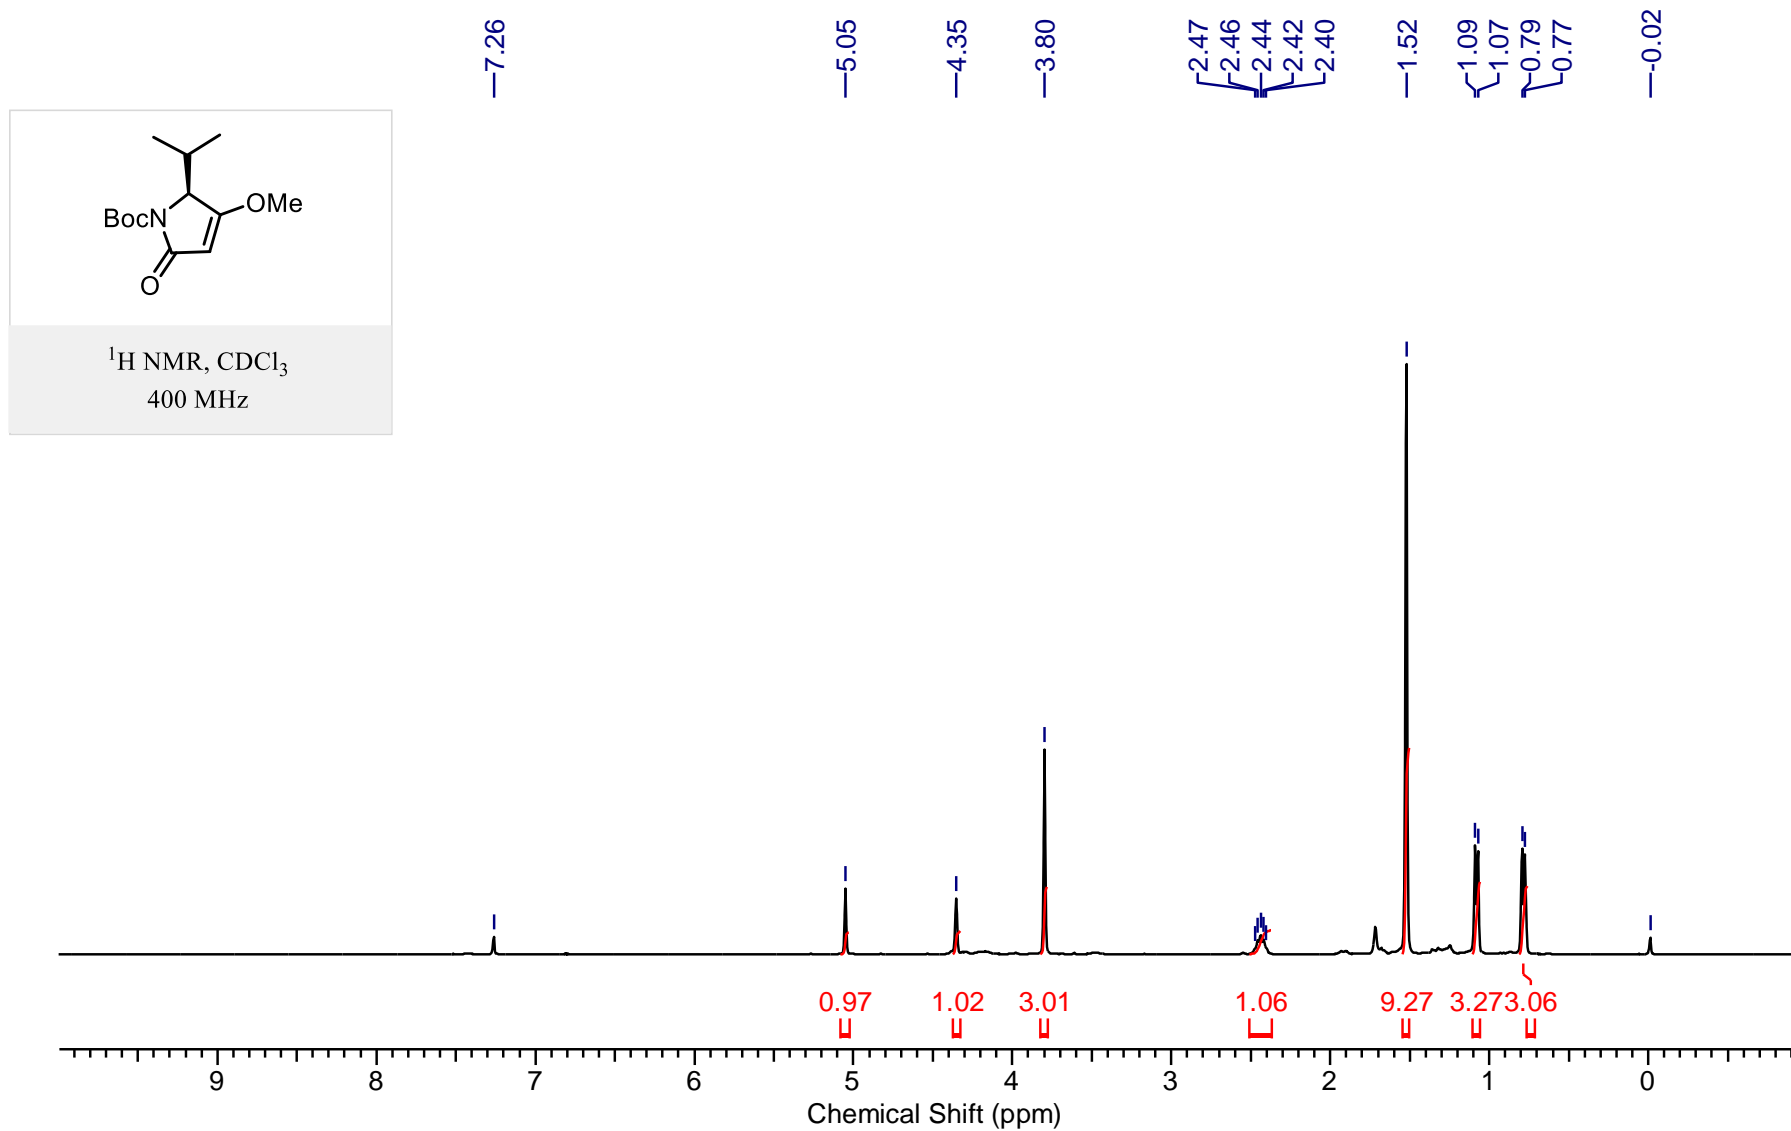

***Tert*-butyl (*S*)-2-isopropyl-3-methoxy-5-oxo-2,5-dihydro-1*H*-pyrrole-1-carboxylate (7):**

—178.02      —169.53      —149.67      —95.07      —82.60      —77.48      —77.16      —76.84      —64.72      —58.40      —29.68      —28.26      —18.85      —15.61

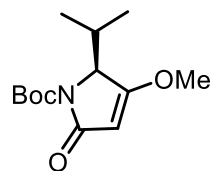

$^{13}\text{C}$  NMR,  $\text{CDCl}_3$   
101 MHz

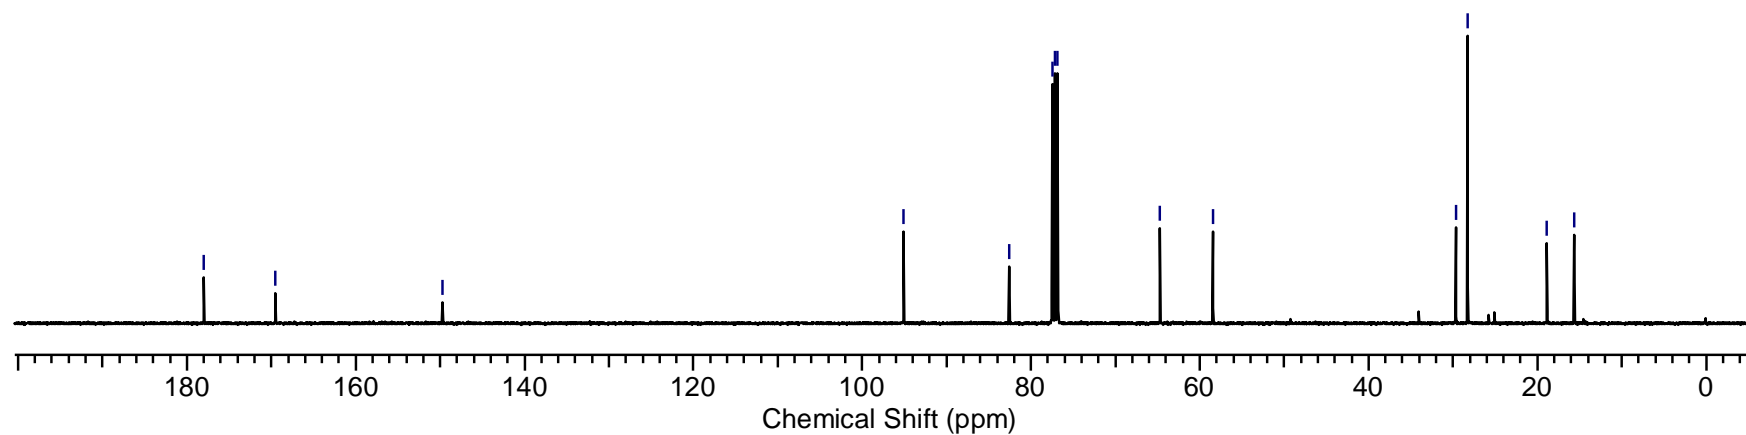

**(S)-5-Isopropyl-4-methoxy-1,5-dihydro-2H-pyrrol-2-one (10):**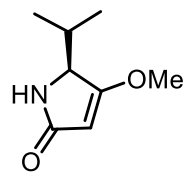

$^1\text{H}$  NMR,  $\text{CDCl}_3$   
400 MHz

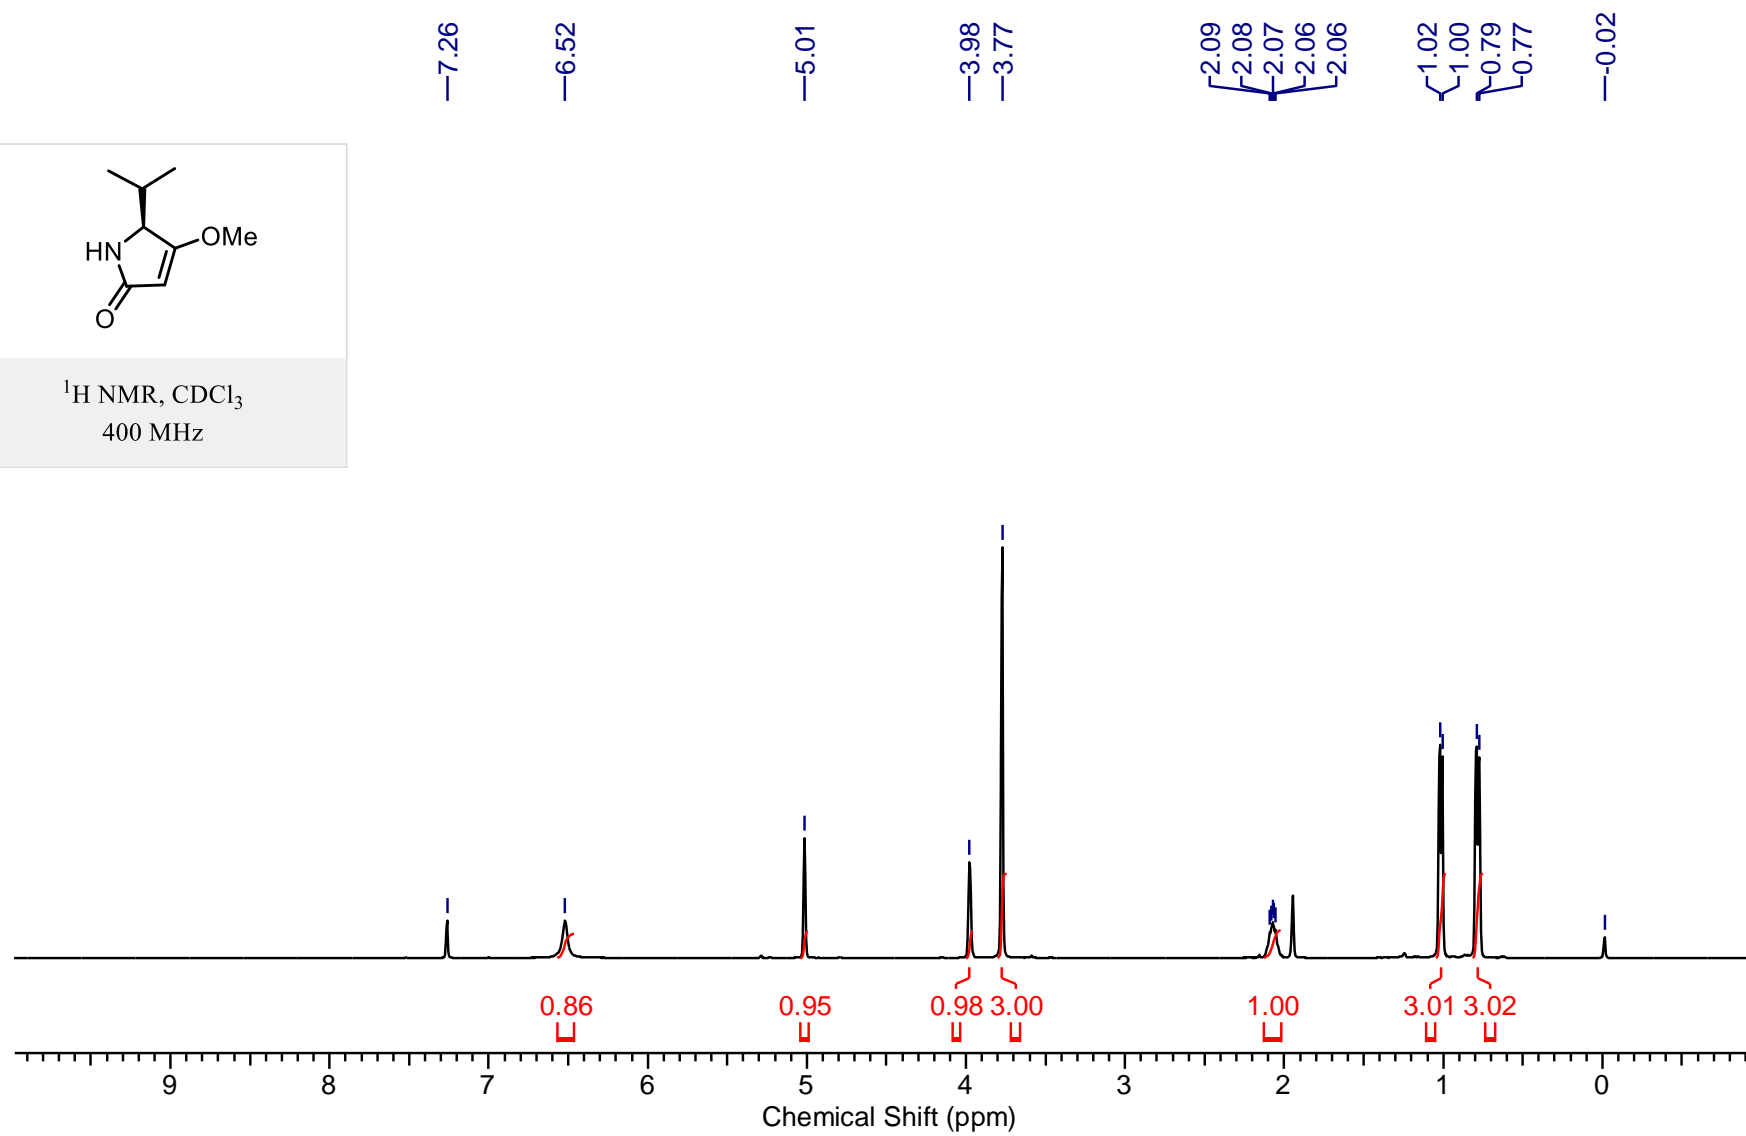

**(S)-5-Isopropyl-4-methoxy-1,5-dihydro-2H-pyrrol-2-one (10):**

—177.77  
—175.10

—94.38

—77.47  
—77.16  
—76.84

—62.77  
—58.30

—29.41

—19.51  
—15.28

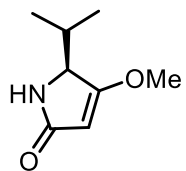

$^{13}\text{C}$  NMR,  $\text{CDCl}_3$   
101 MHz

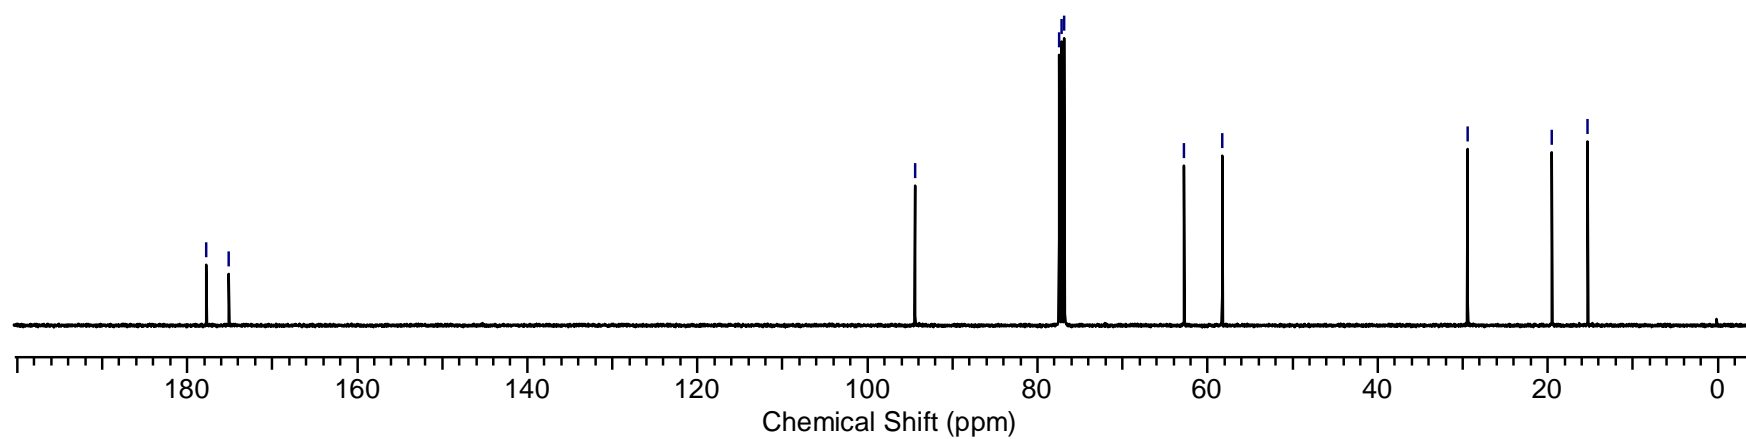

**Benzyl (S)-2-hydroxy-3-methylbutanoate (15):**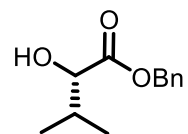

$^1\text{H}$  NMR,  $\text{CDCl}_3$   
400 MHz

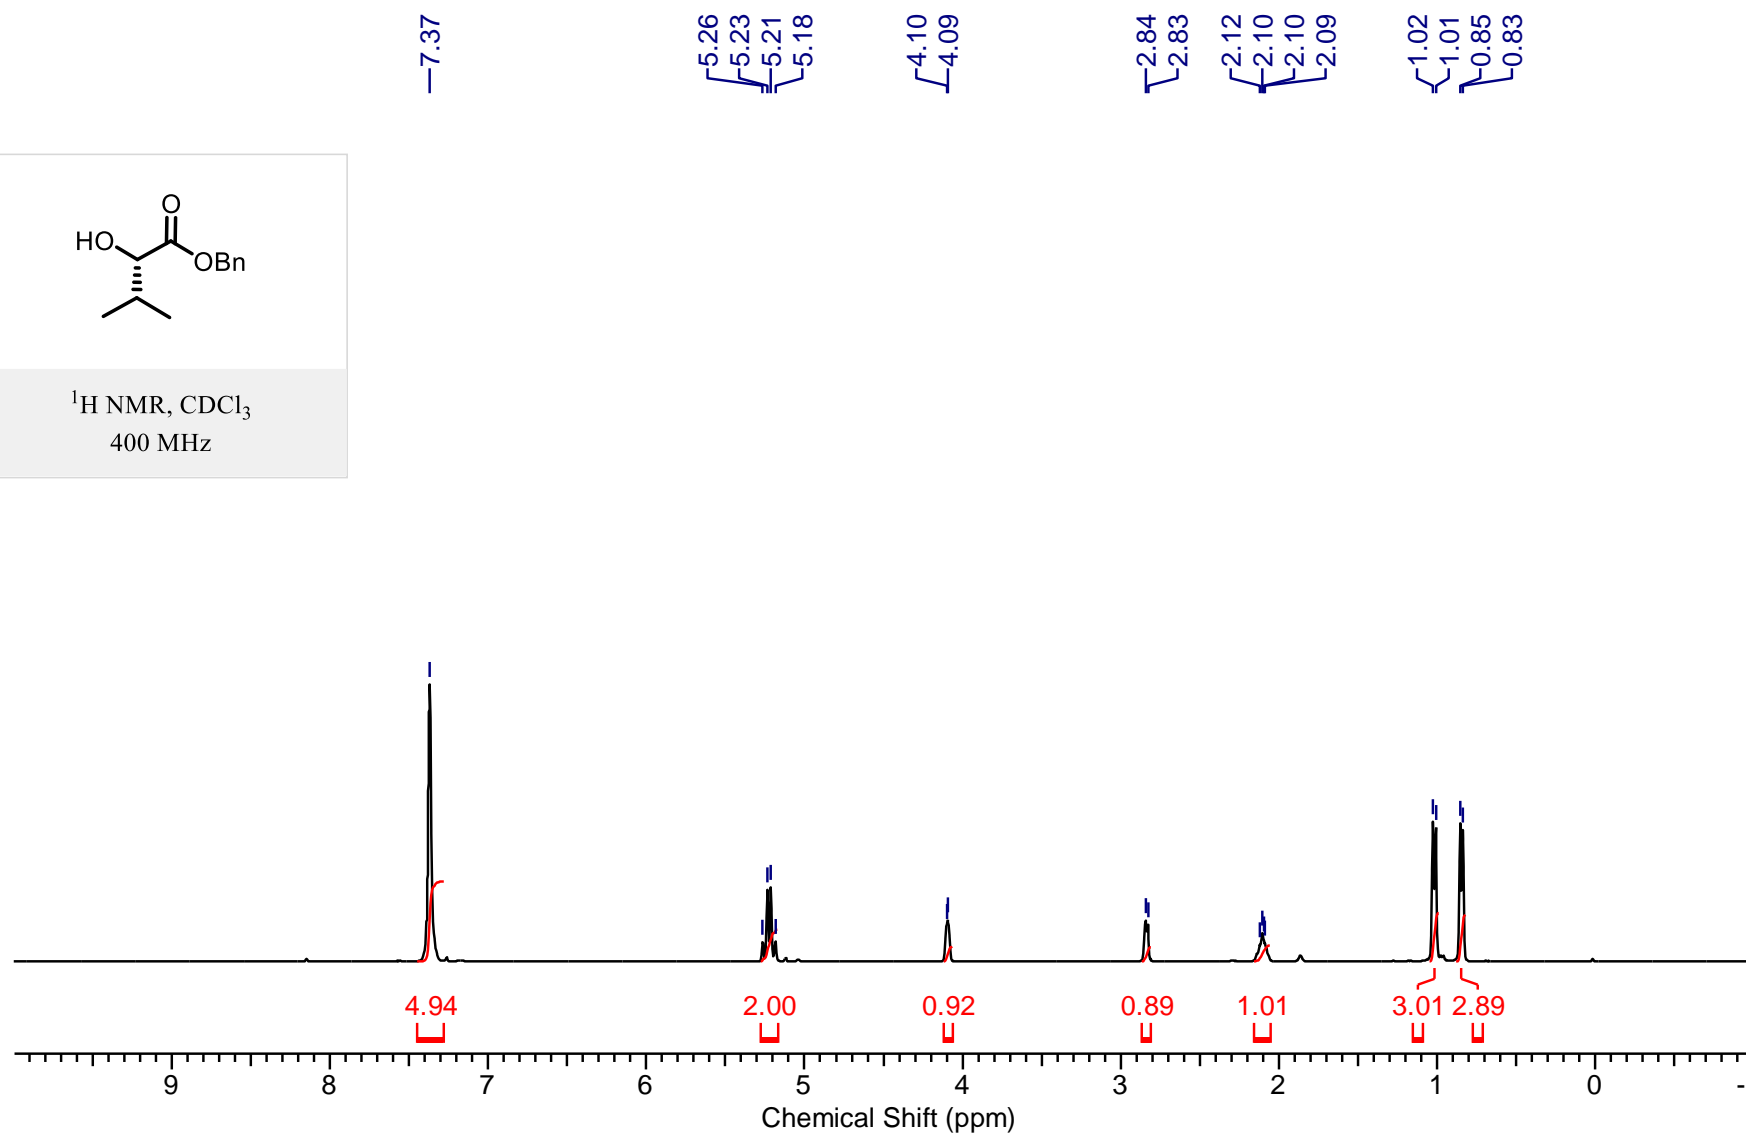



**Benzyl (S)-2-hydroxy-3-methylbutanoate (15):**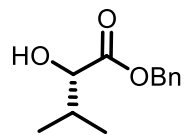

$^{13}\text{C}$  NMR,  $\text{CDCl}_3$   
101 MHz

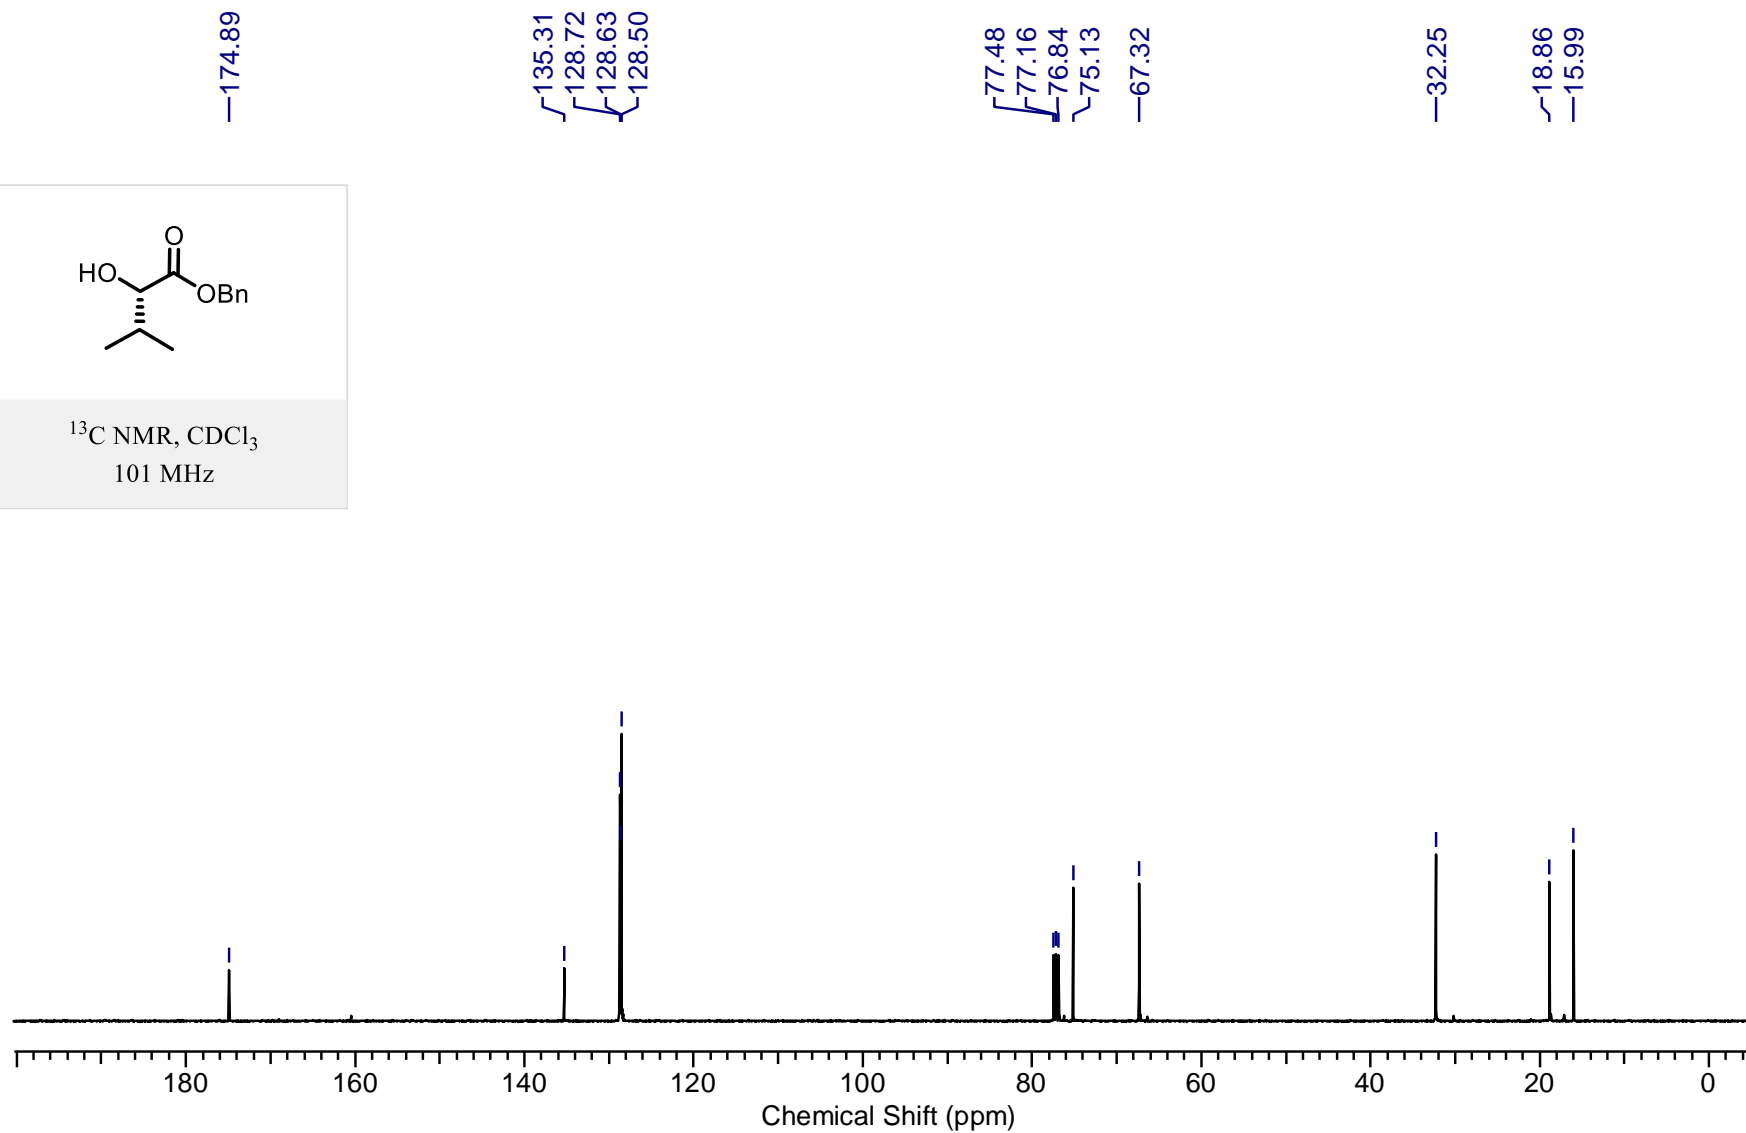

**Benzyl (S)-2-((N-(tert-butoxycarbonyl)-N-methyl-L-alanyl)oxy)-3-methylbutanoate (16):**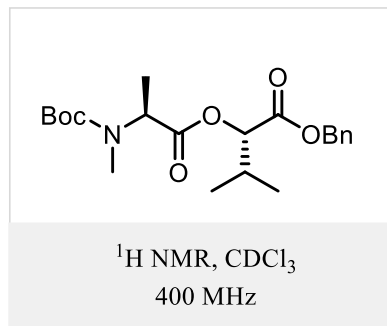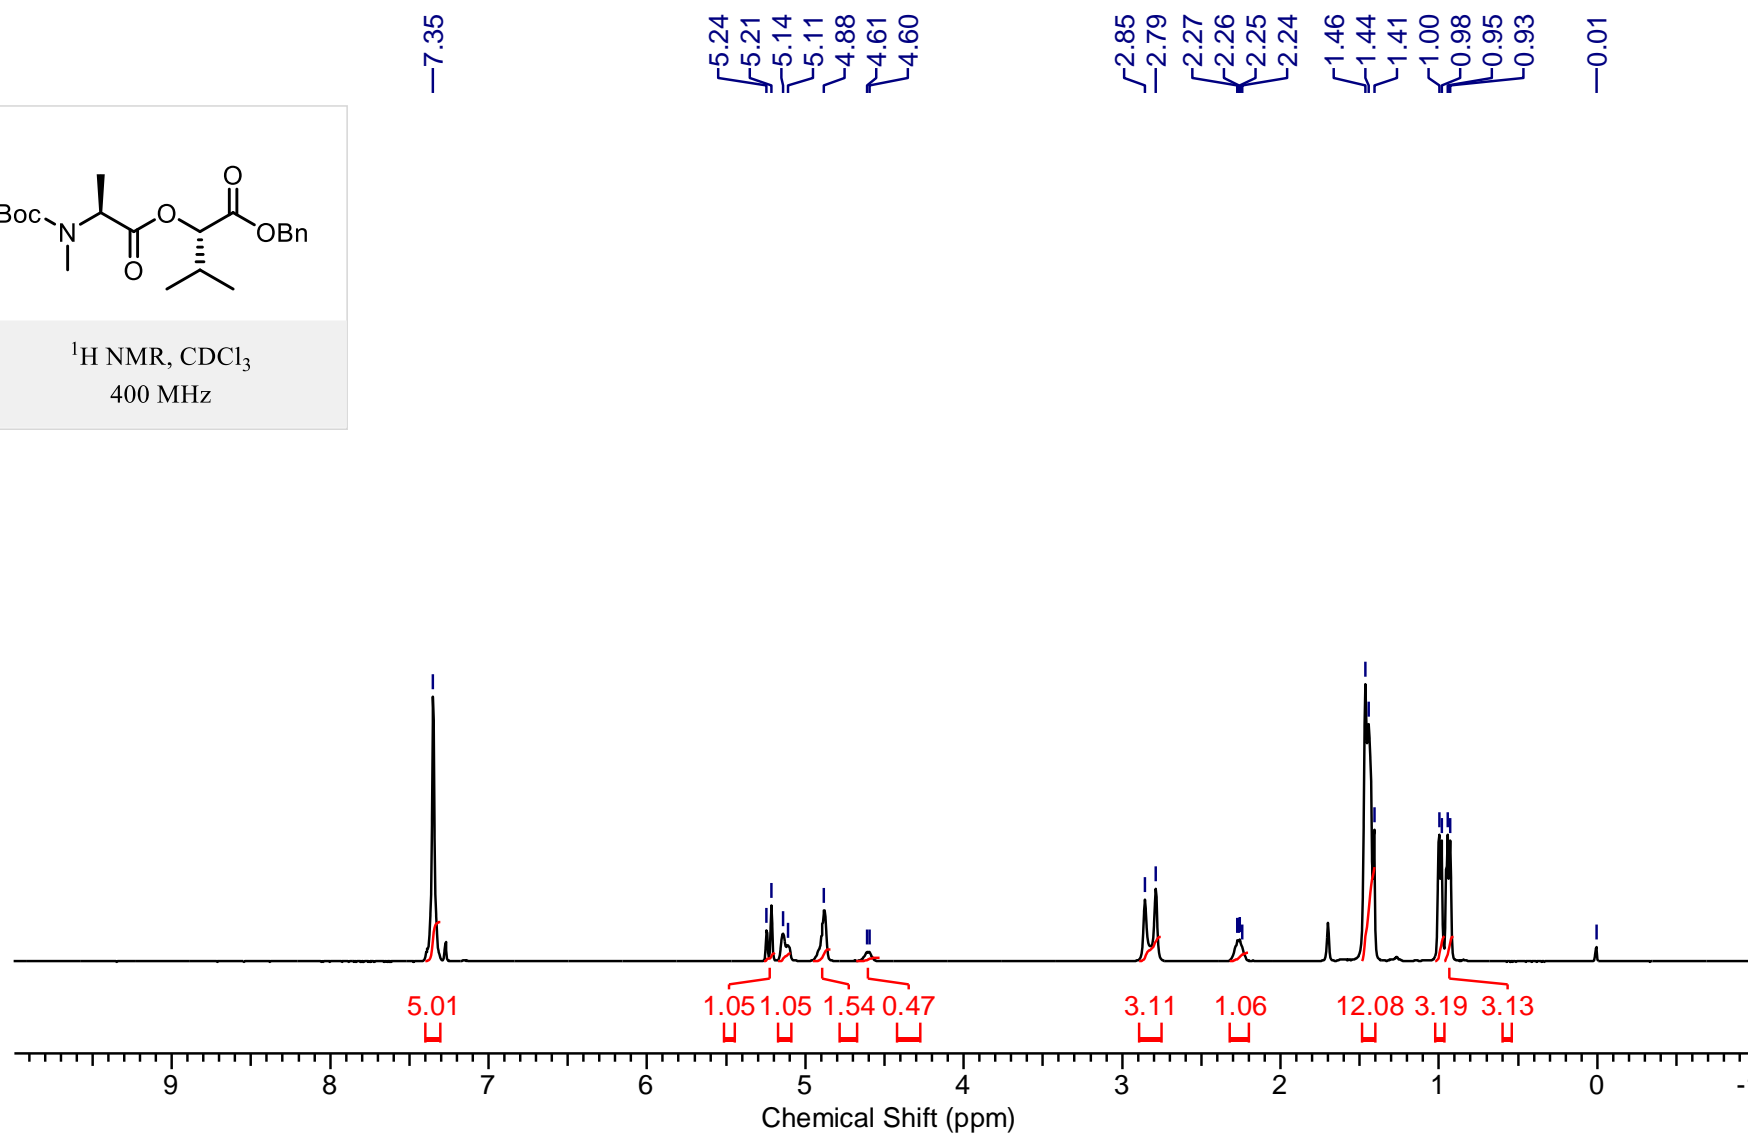

**Benzyl (S)-2-((N-(tert-butoxycarbonyl)-N-methyl-L-alanyl)oxy)-3-methylbutanoate (16):**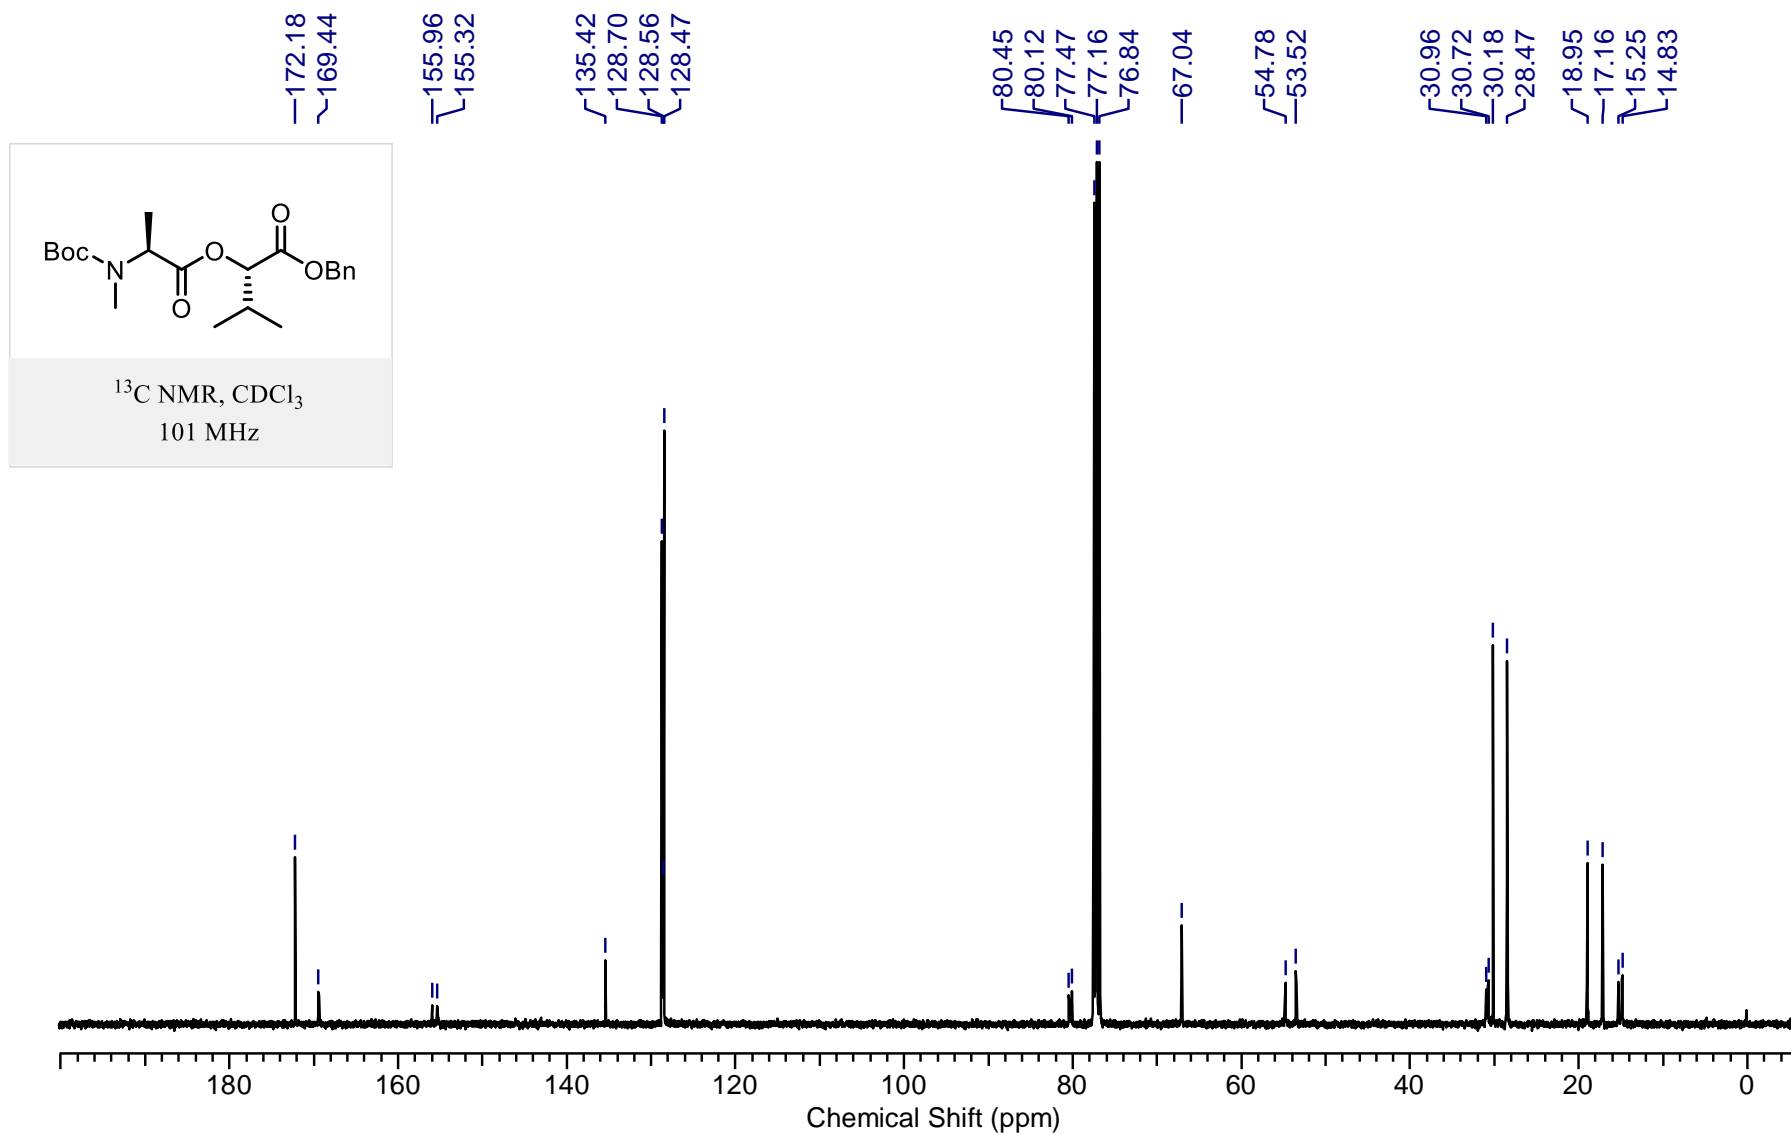

**4-Nitrophenyl (S)-2-((N-(tert-butoxycarbonyl)-N-methyl-L-alanyl)oxy)-3-methylbutanoate (18):**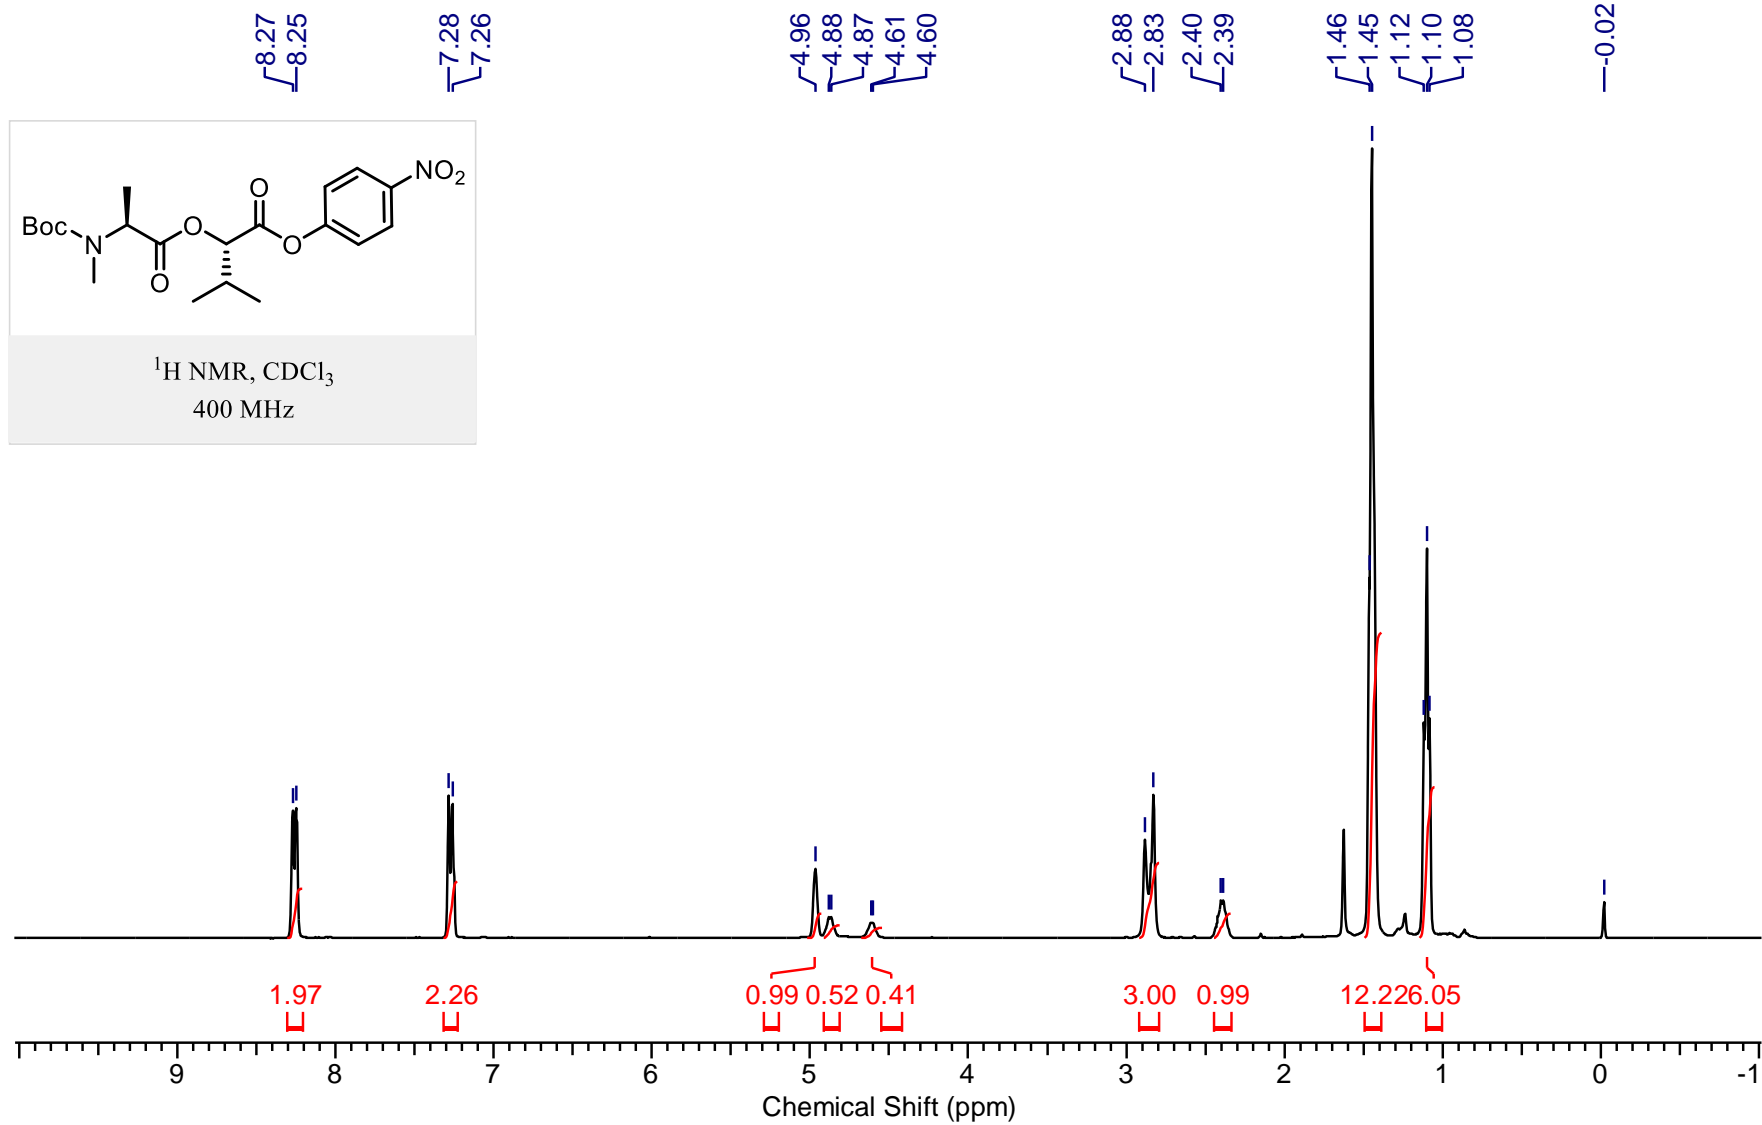

**4-Nitrophenyl (*S*)-2-((*N*-(*tert*-butoxycarbonyl)-*N*-methyl-*L*-alanyl)oxy)-3-methylbutanoate (18):**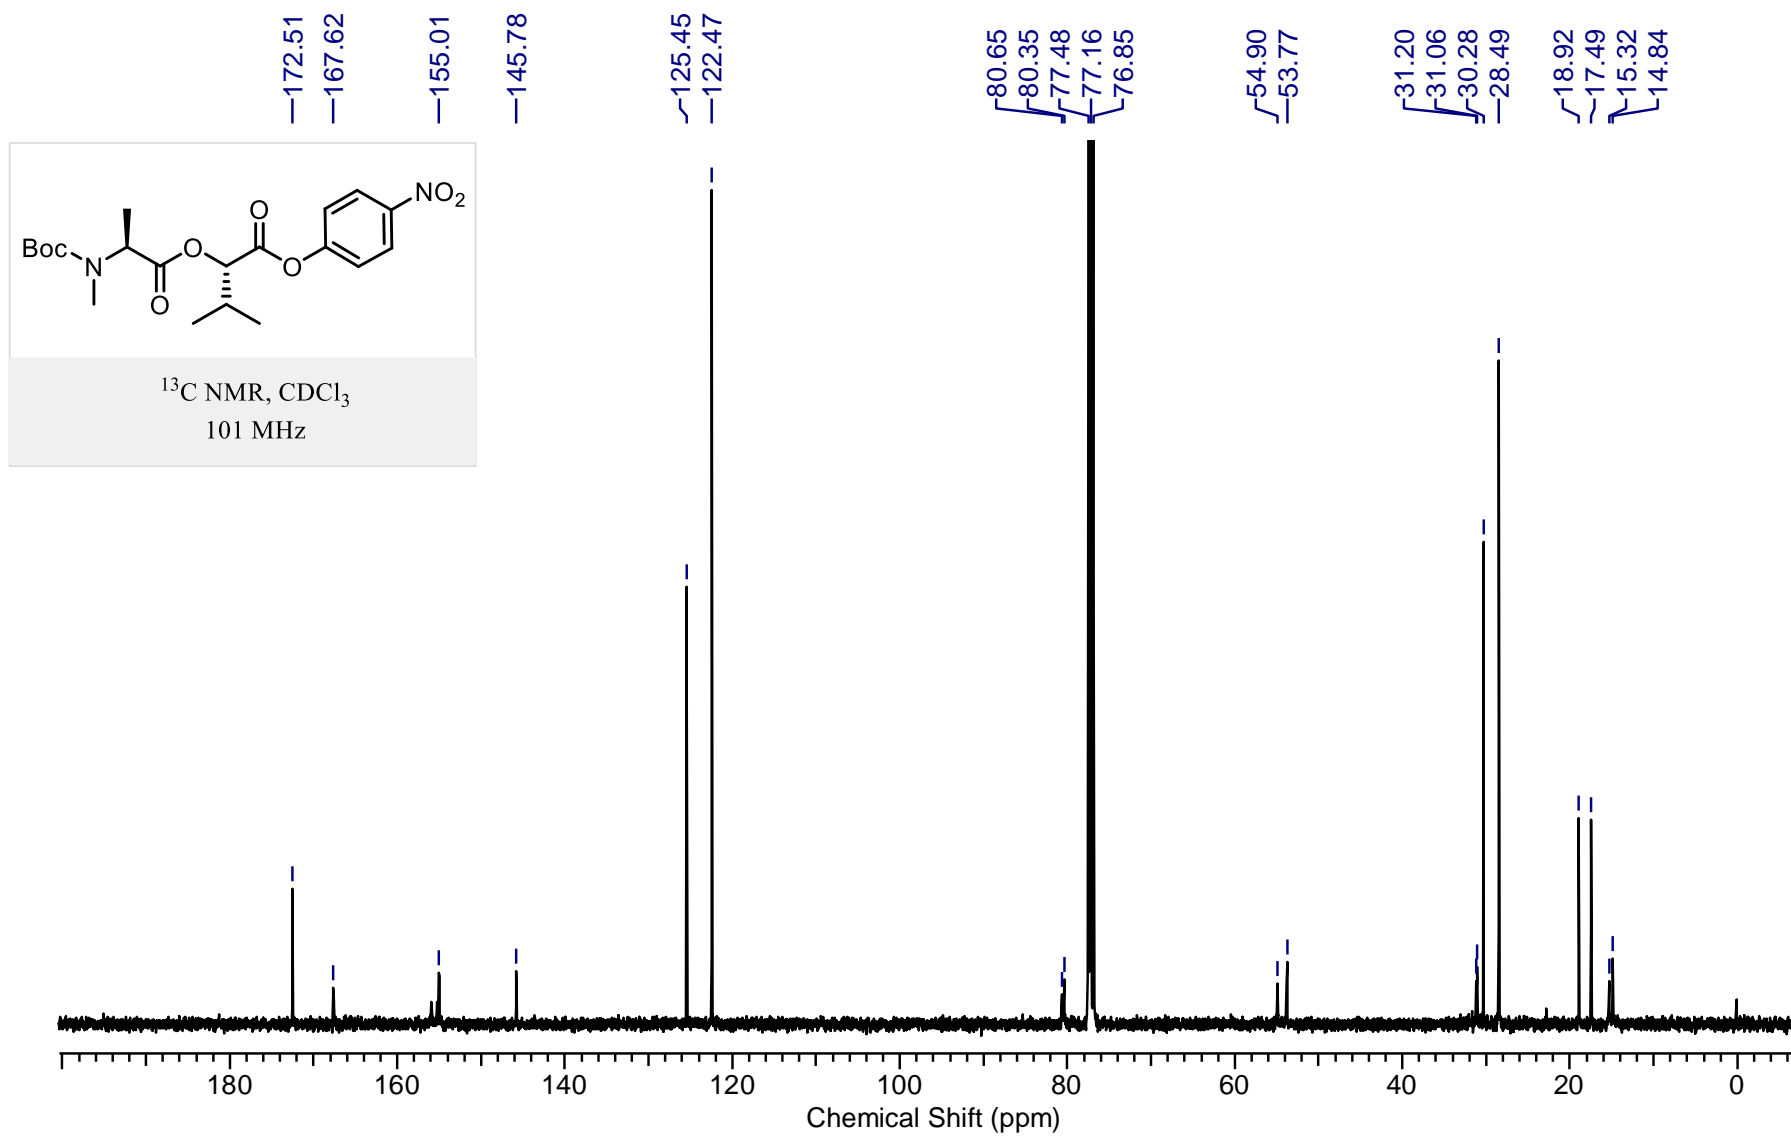

**(S)-1-((S)-2-Isopropyl-3-methoxy-5-oxo-2,5-dihydro-1H-pyrrol-1-yl)-3-methyl-1-oxobutan-2-yl N-(tert-butoxycarbonyl)-N-methyl-L-alaninate (19):**

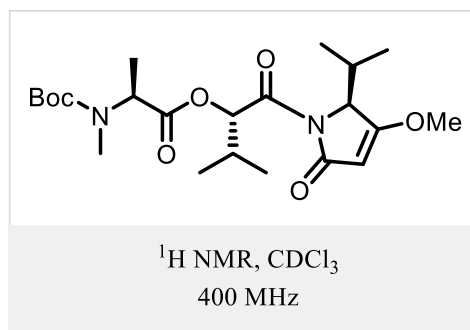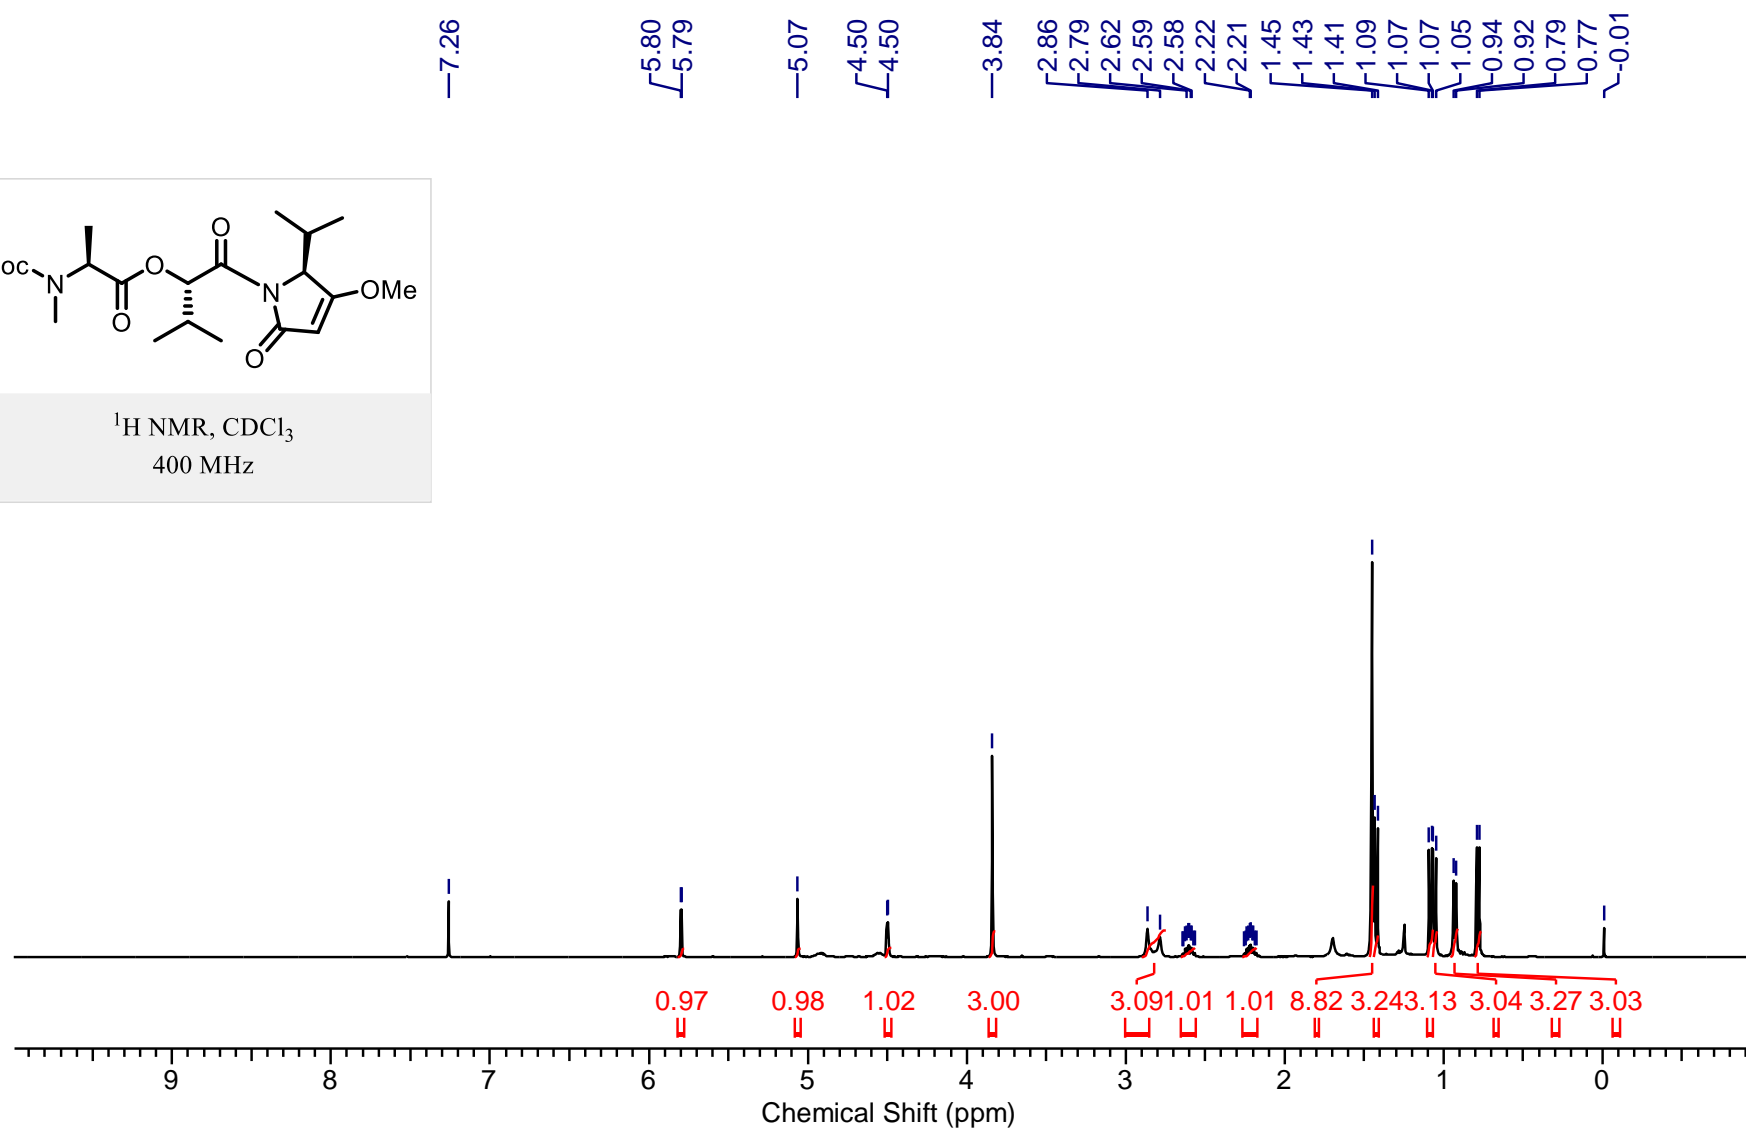

**(S)-1-((S)-2-Isopropyl-3-methoxy-5-oxo-2,5-dihydro-1H-pyrrol-1-yl)-3-methyl-1-oxobutan-2-yl N-(tert-butoxycarbonyl)-N-methyl-L-alaninate (19):**

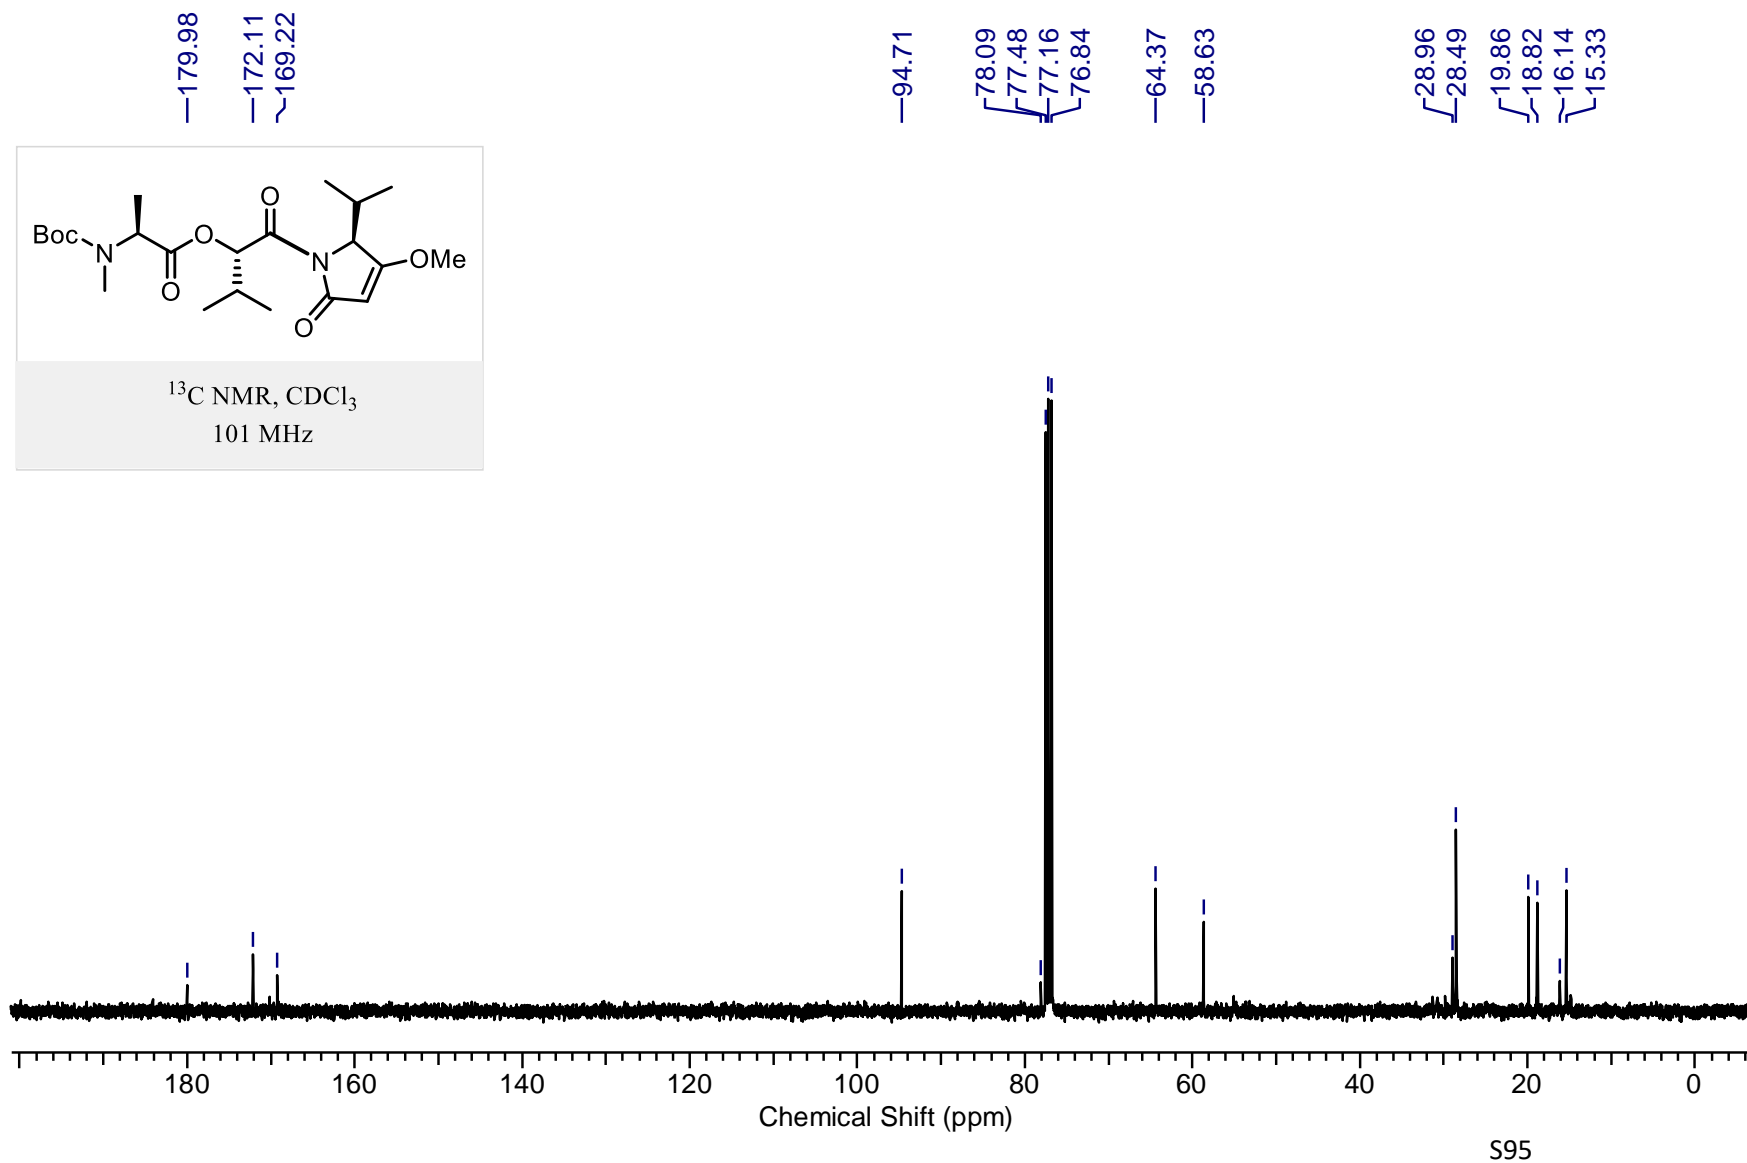



**(S)-1-((S)-2-Isopropyl-3-methoxy-5-oxo-2,5-dihydro-1H-pyrrol-1-yl)-3-methyl-1-oxobutan-2-yl N-((tert-butoxycarbonyl)-L-valyl)-N-methyl-L-alaninate (20):**

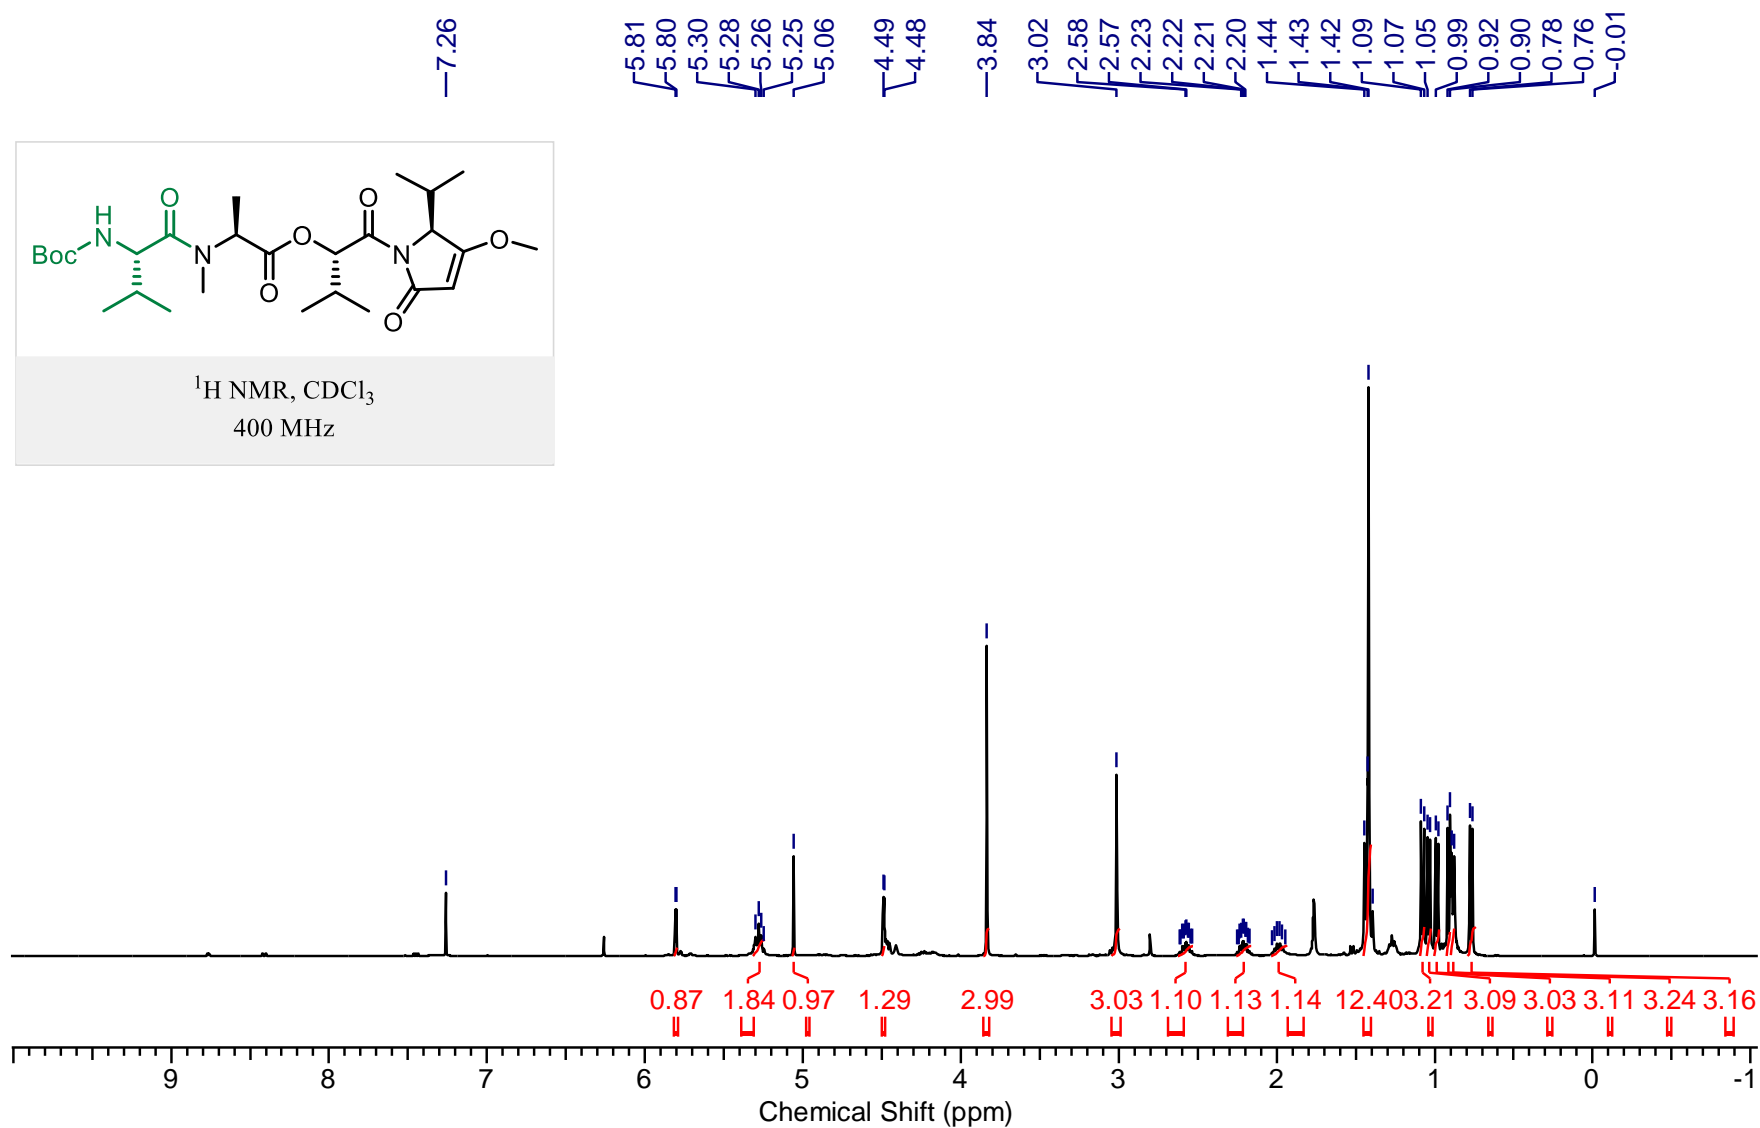

**(S)-1-((S)-2-Isopropyl-3-methoxy-5-oxo-2,5-dihydro-1H-pyrrol-1-yl)-3-methyl-1-oxobutan-2-yl N-((tert-butoxycarbonyl)-L-valyl)-N-methyl-L-alaninate (20):**

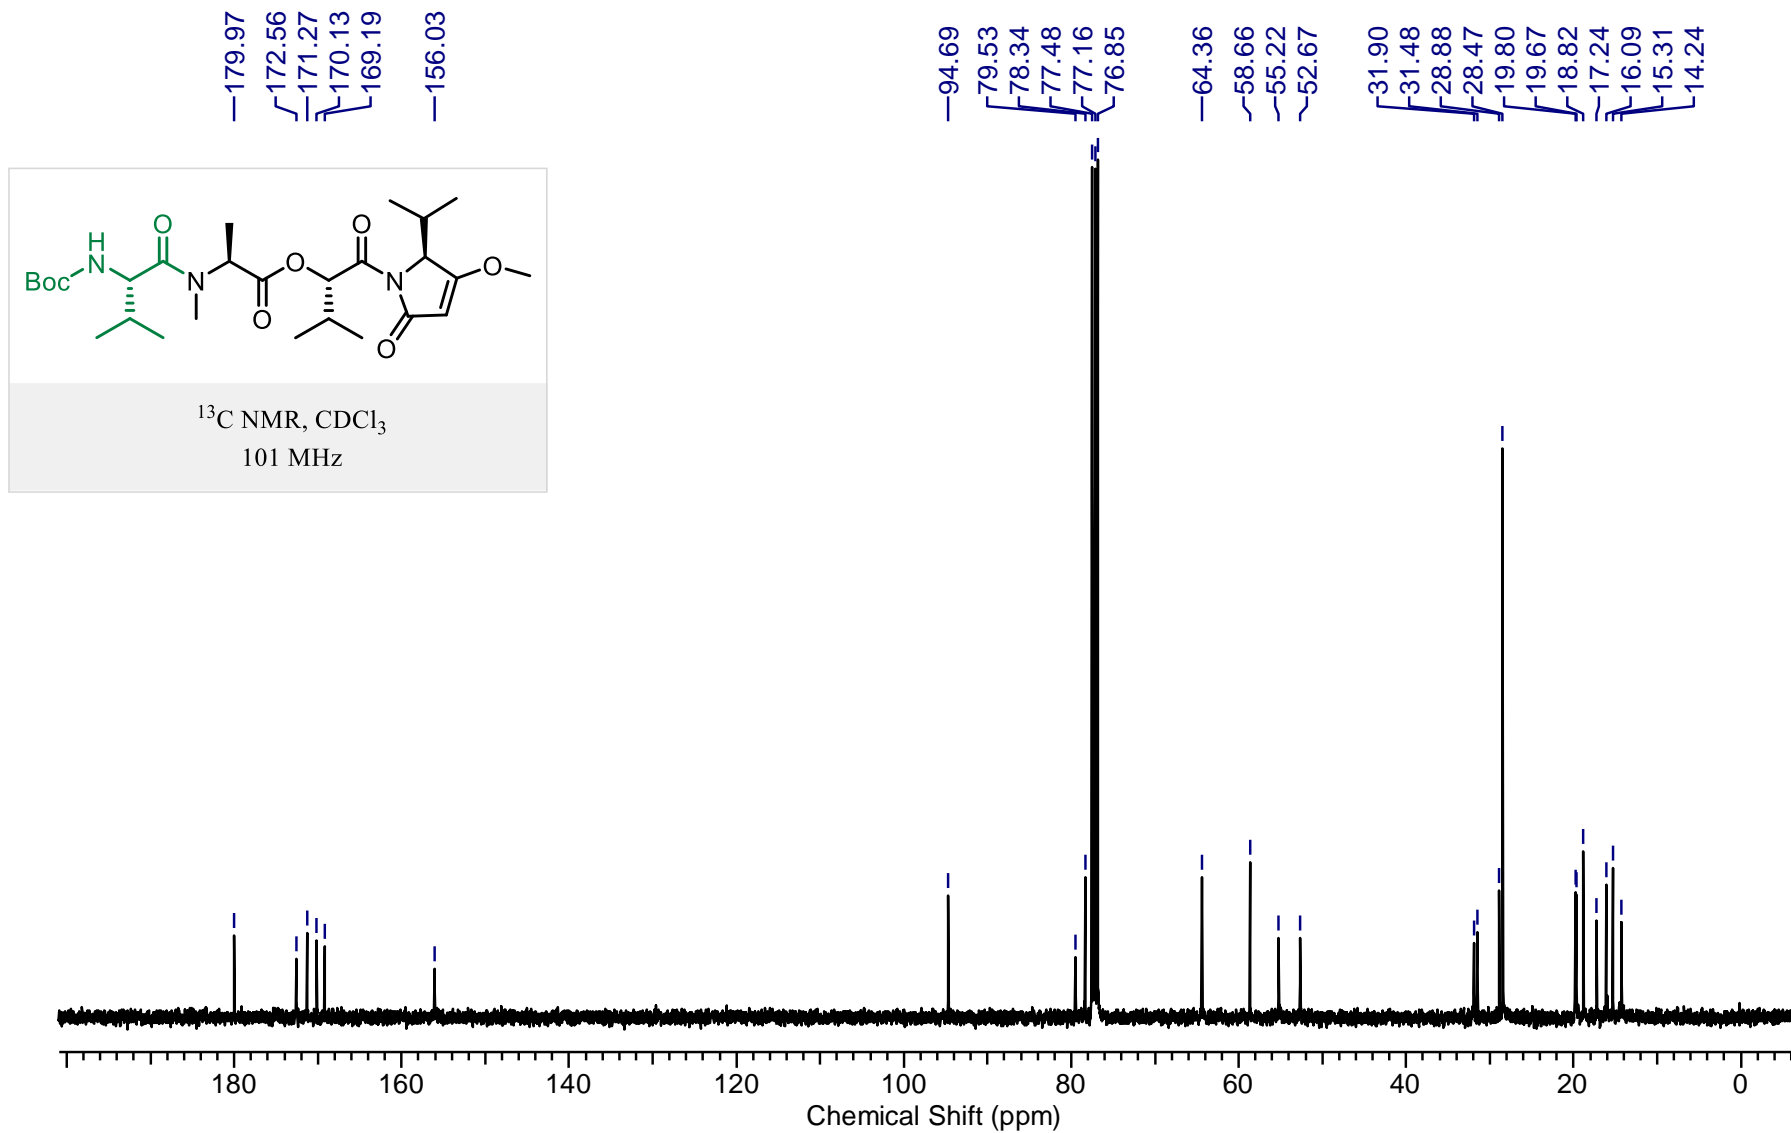

**(S)-1-((S)-2-Hydroxy-3-methylbutanoyl)-5-isopropyl-4-methoxy-1,5-dihydro-2H-pyrrol-2-one (20a):**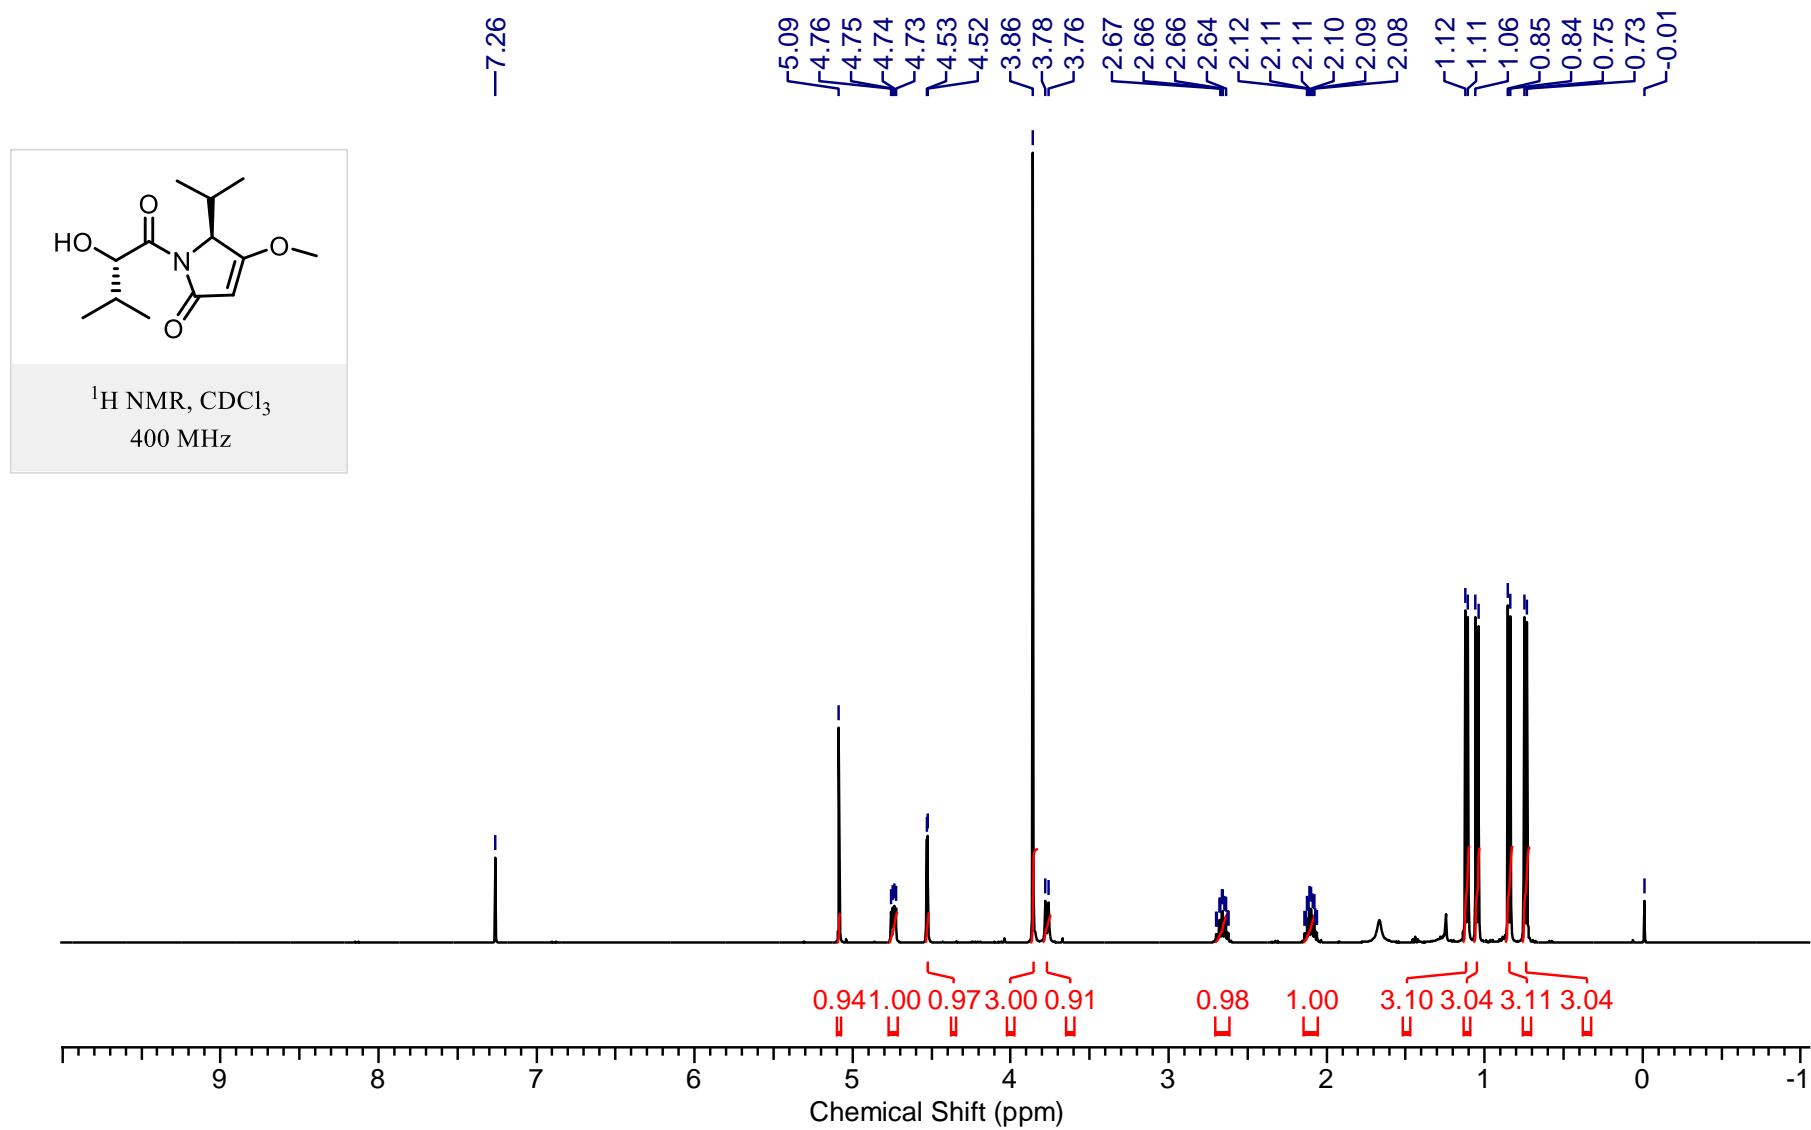

**(S)-1-((S)-2-Hydroxy-3-methylbutanoyl)-5-isopropyl-4-methoxy-1,5-dihydro-2H-pyrrol-2-one (20a):**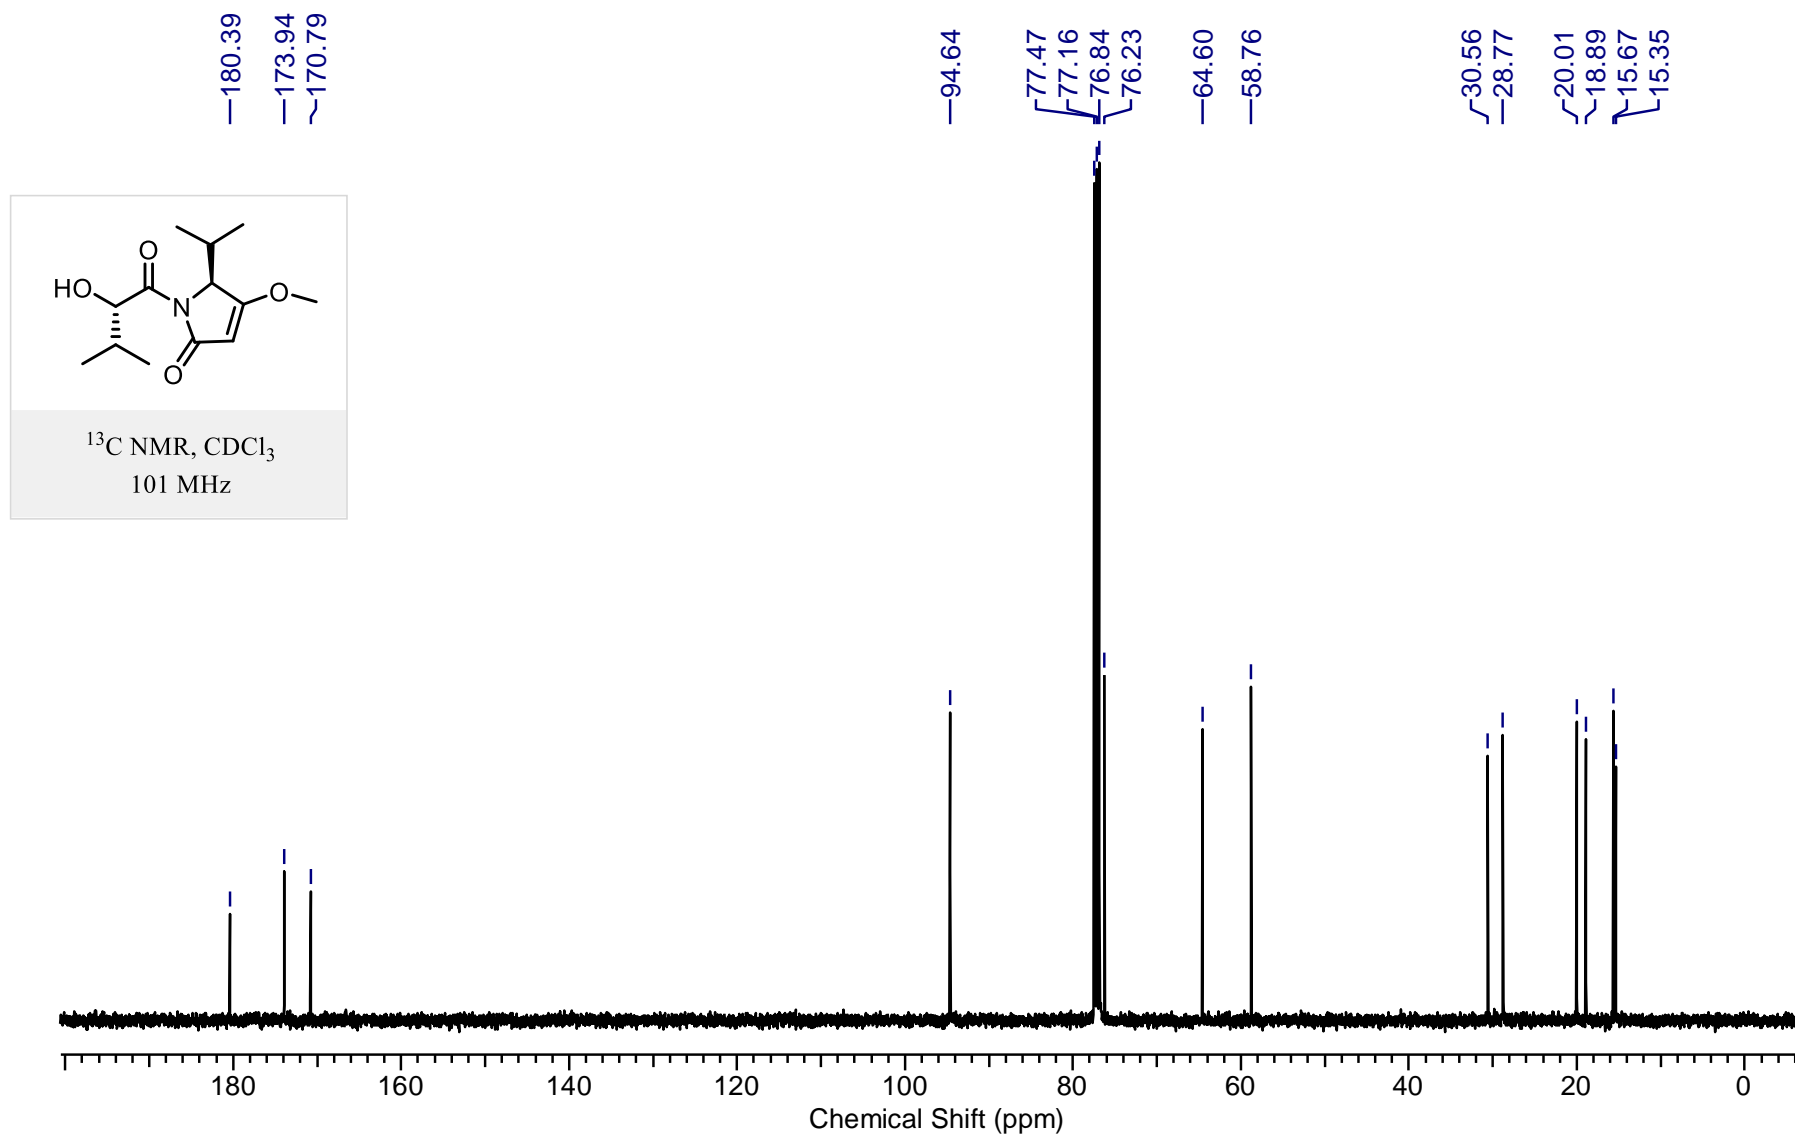

**(S)-1-(((S)-2-Isopropyl-3-methoxy-5-oxo-2,5-dihydro-1H-pyrrol-1-yl)-3-methyl-1-oxobutan-2-yl N-(((S)-3-((tert-butyl)dimethylsilyl)oxy)decanoyl)-L-valyl)-N-methyl-L-alaninate (21):**

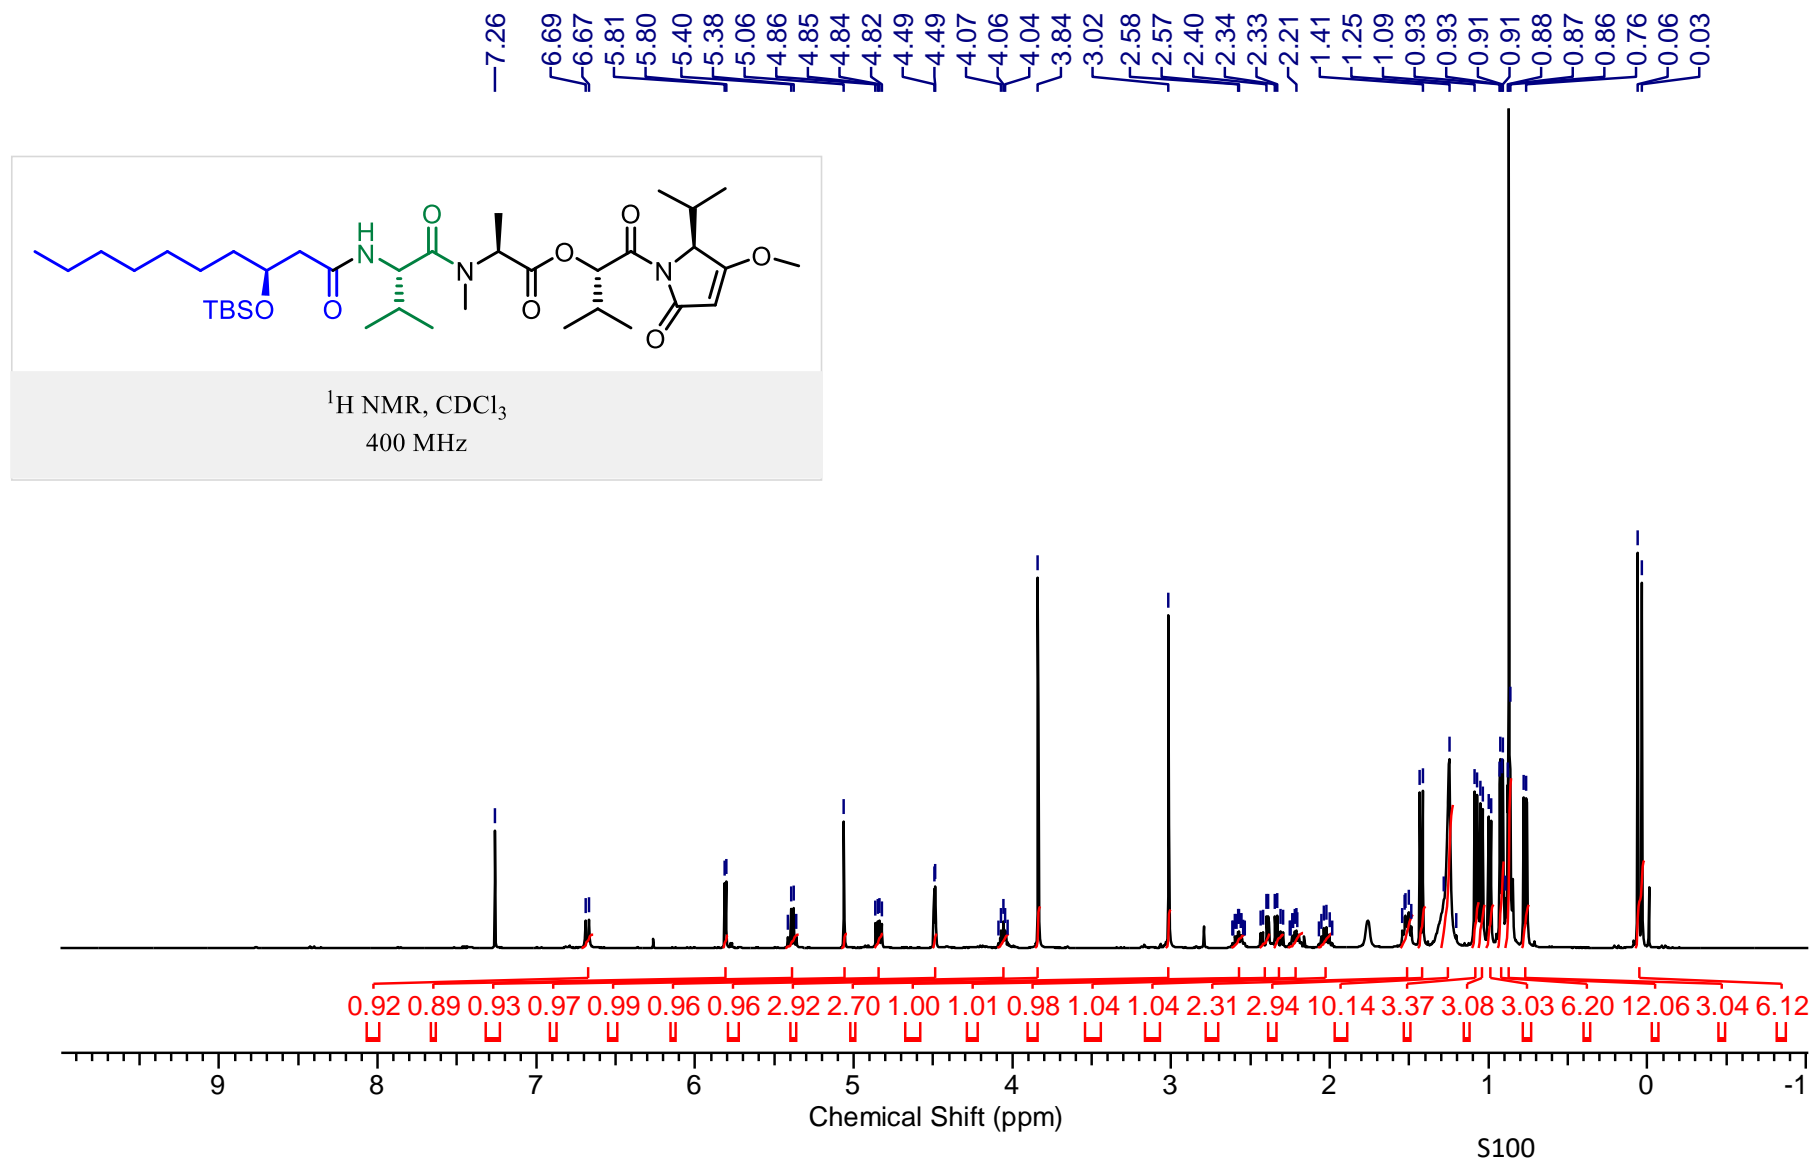

**(S)-1-((S)-2-Isopropyl-3-methoxy-5-oxo-2,5-dihydro-1H-pyrrol-1-yl)-3-methyl-1-oxobutan-2-yl N-(((S)-3-((tert-butyldimethylsilyl)oxy)decanoyl)-L-valyl)-N-methyl-L-alaninate (21):**

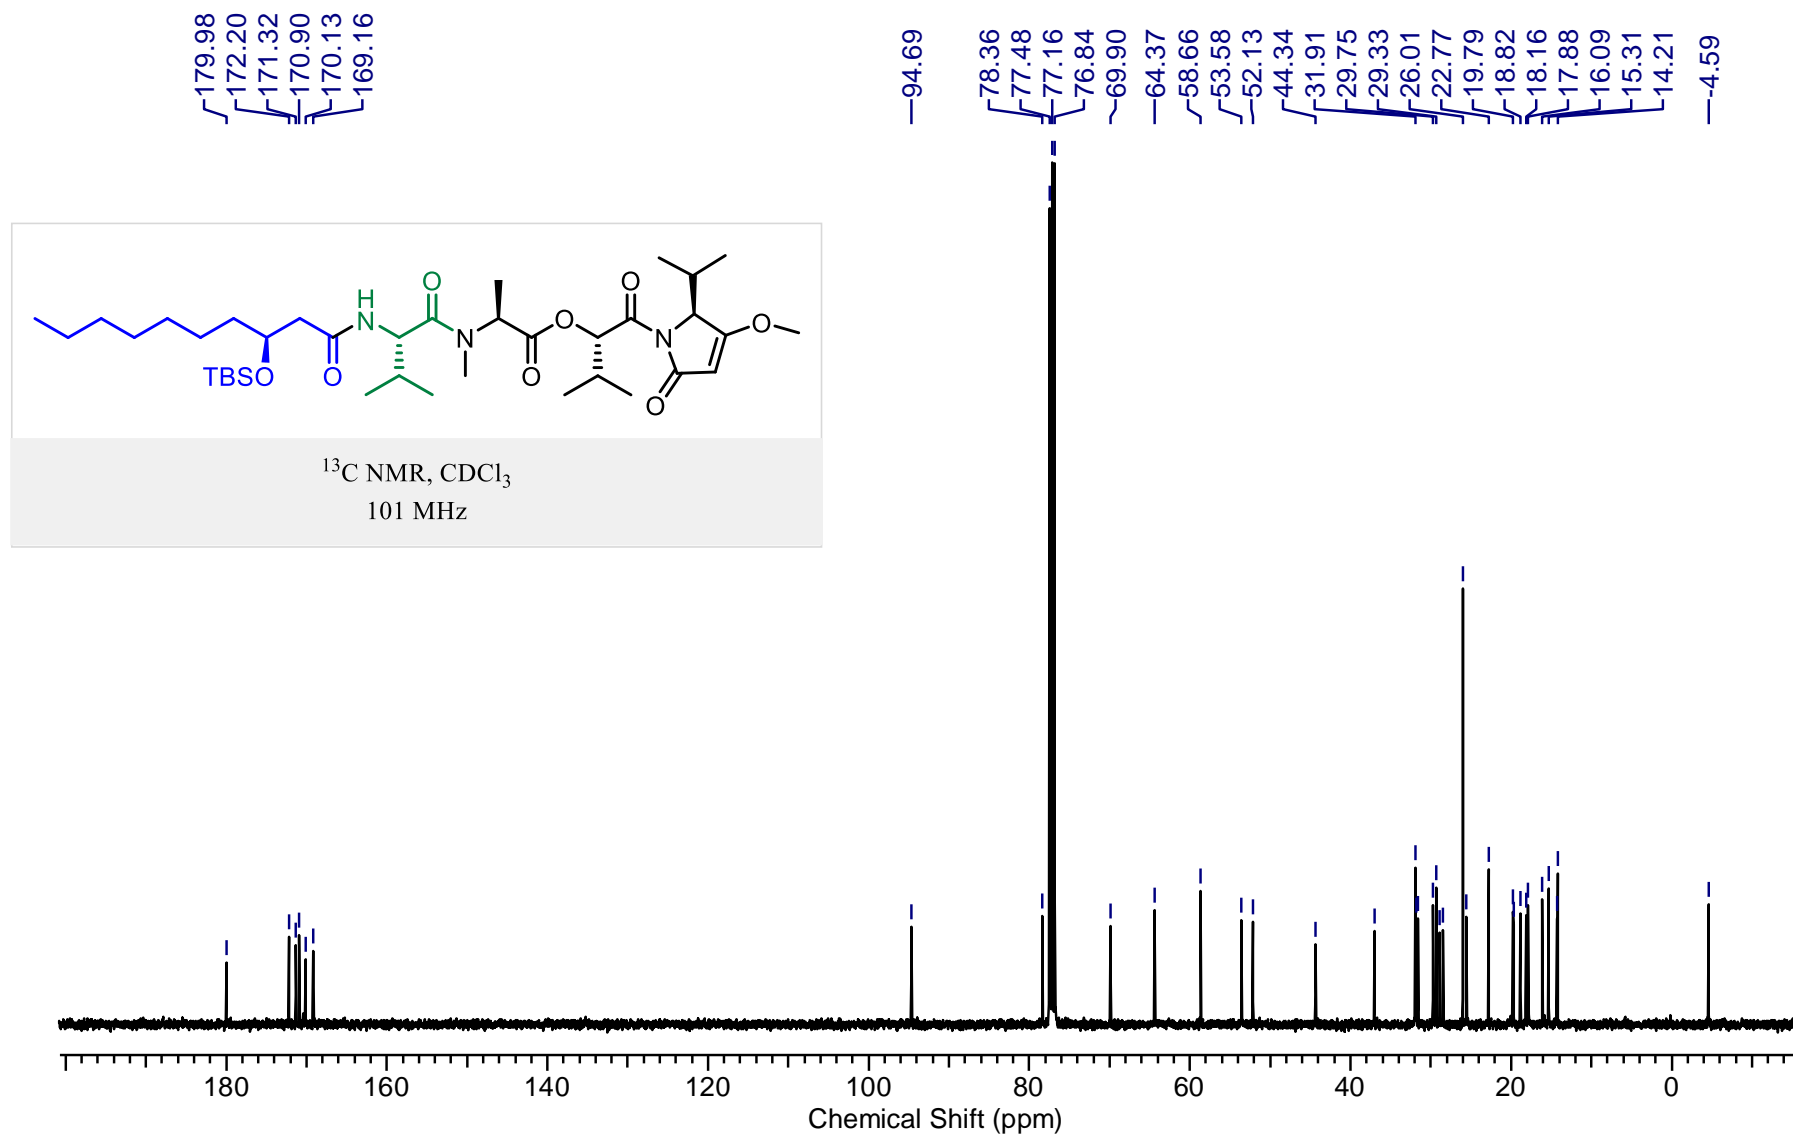

**(S)-1-(((S)-2-Isopropyl-3-methoxy-5-oxo-2,5-dihydro-1H-pyrrol-1-yl)-3-methyl-1-oxobutan-2-yl N-(((S)-3-hydroxydecanoyl)-L-valyl)-N-methyl-L-alaninate (Kavaratamide A) (1):**

7.26 6.60 6.58 5.81 5.80 5.28 5.26 5.24 5.07 4.83 4.82 4.81 4.80 4.49 4.48 3.94 3.84 3.03 2.35 2.35 2.28 2.24 1.45 1.43 1.08 1.07 0.92 0.90 0.90 0.89 0.86 0.75

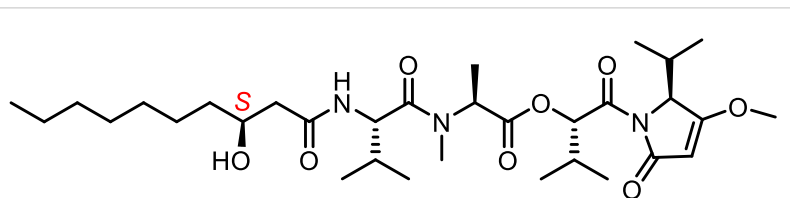

<sup>1</sup>H NMR, CDCl<sub>3</sub>  
400 MHz

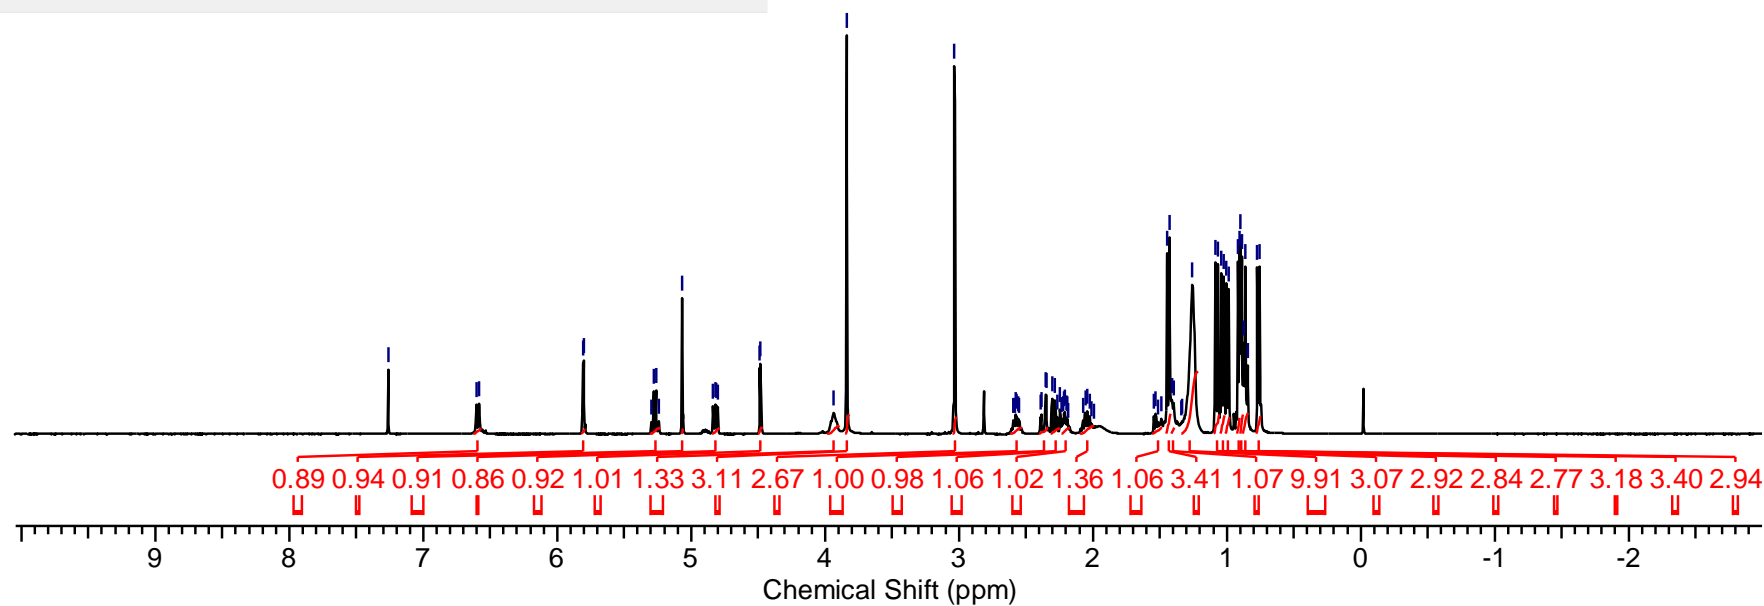



**(S)-1-(((S)-2-Isopropyl-3-methoxy-5-oxo-2,5-dihydro-1H-pyrrol-1-yl)-3-methyl-1-oxobutan-2-yl N-(((S)-3-hydroxydecanoyl)-L-valyl)-N-methyl-L-alaninate (Kavaratamide A) (1):**

179.99  
172.86  
172.28  
171.12  
170.15  
169.11

94.67

78.38  
77.48  
77.16  
76.85  
68.92  
64.35  
58.68  
53.87  
52.73  
37.11  
31.92  
29.65  
29.35  
28.86  
25.58  
22.76  
19.77  
18.80  
17.47  
16.08  
15.29  
14.21

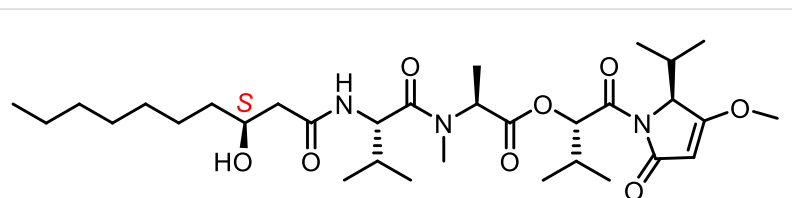

$^{13}\text{C}$  NMR,  $\text{CDCl}_3$   
101 MHz

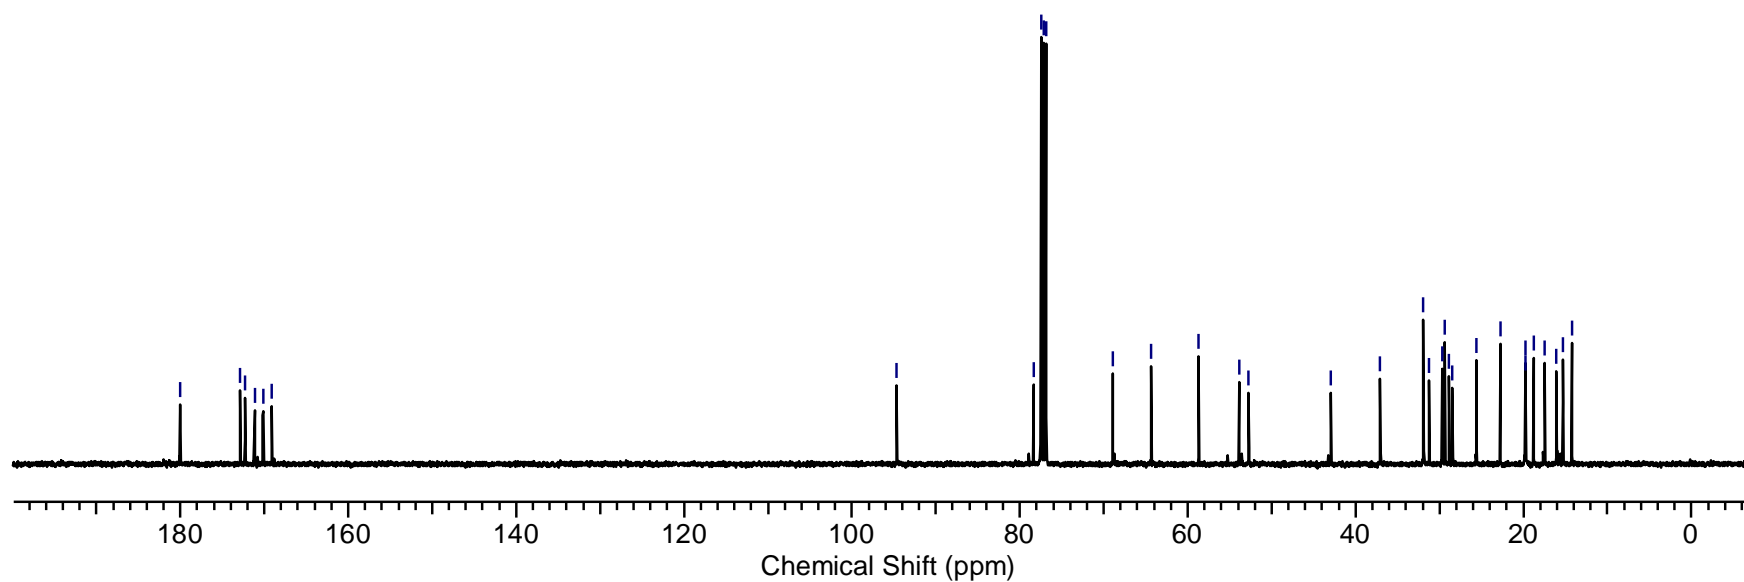

**(S)-1-(((S)-2-Isopropyl-3-methoxy-5-oxo-2,5-dihydro-1H-pyrrol-1-yl)-3-methyl-1-oxobutan-2-yl N-(((S)-3-hydroxydecanoyl)-L-valyl)-N-methyl-L-alaninate (Kavaratamide A) (1):**

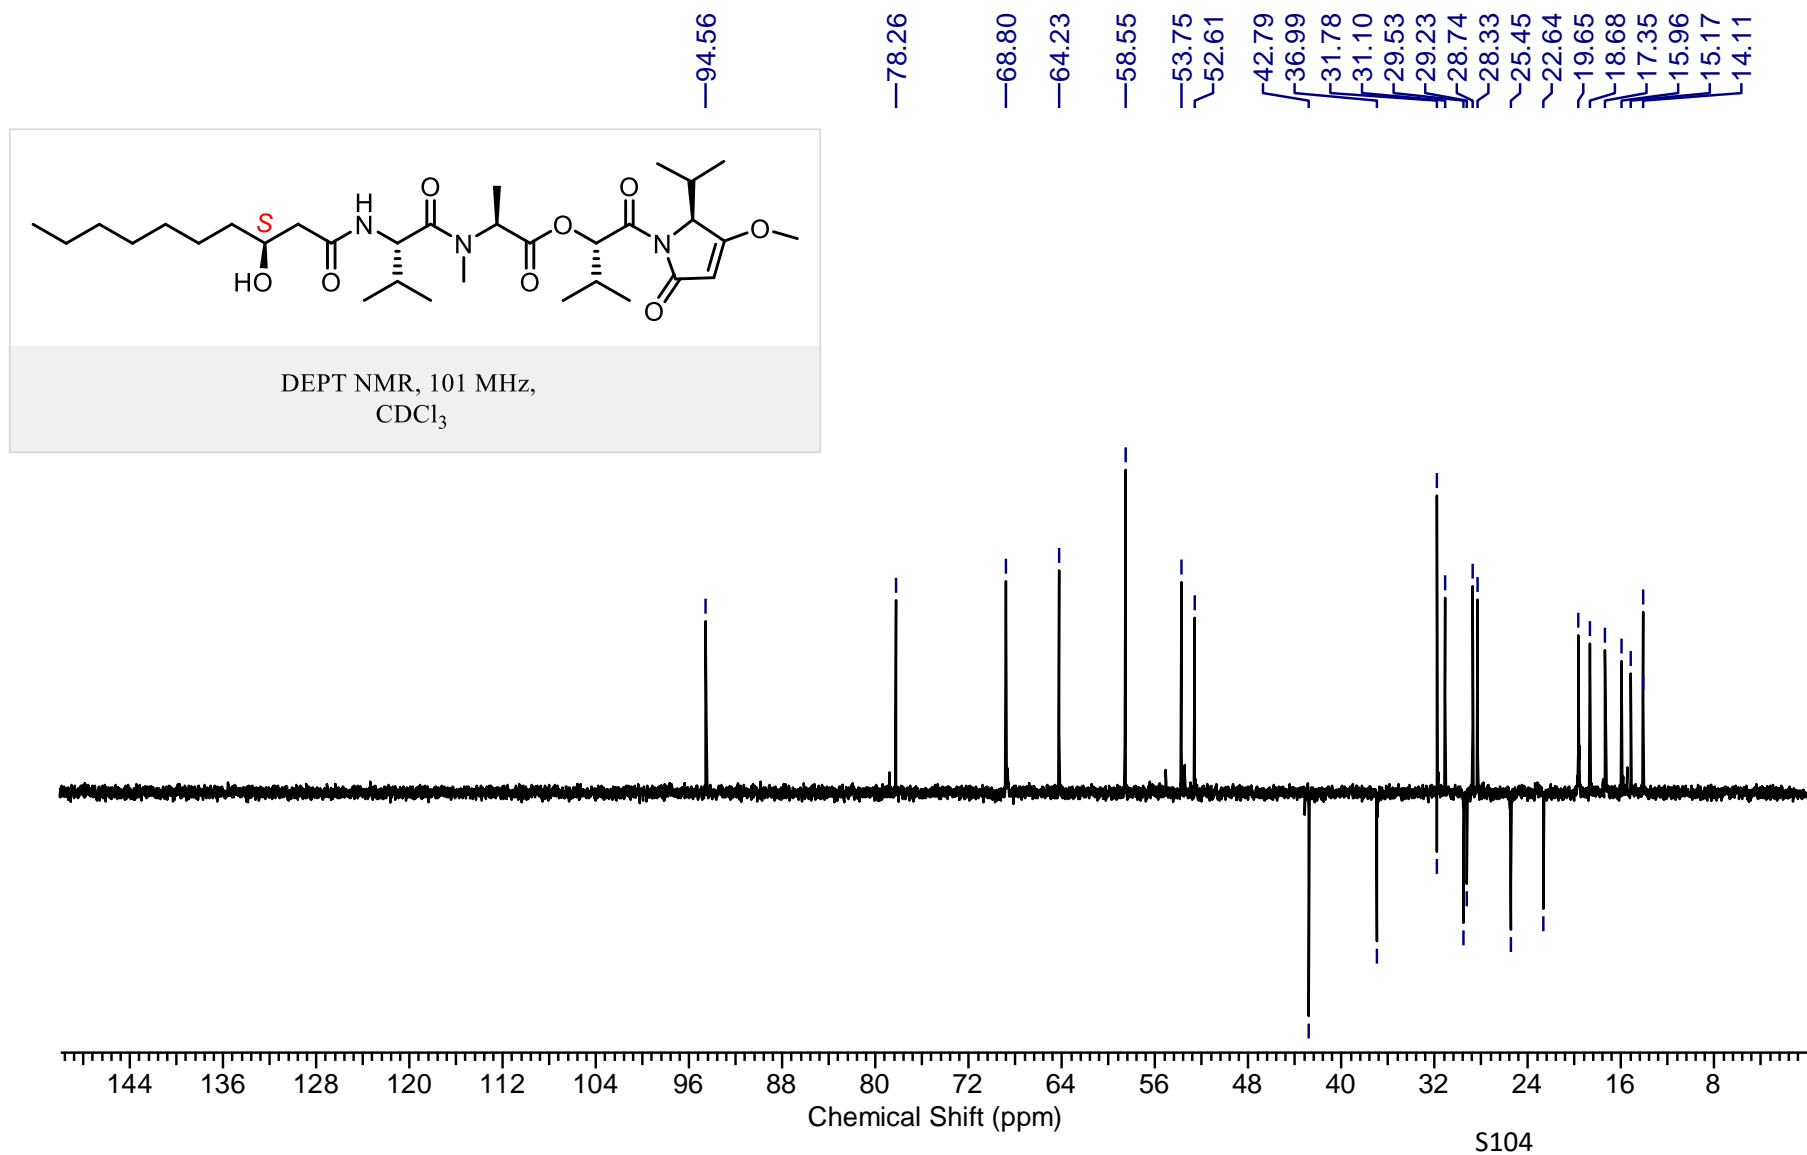

**(S)-1-(((S)-2-Isopropyl-3-methoxy-5-oxo-2,5-dihydro-1H-pyrrol-1-yl)-3-methyl-1-oxobutan-2-yl N-(((R)-3-((tert-butyldimethylsilyl)oxy)decanoyl)-L-valyl)-N-methyl-L-alaninate (21')**:

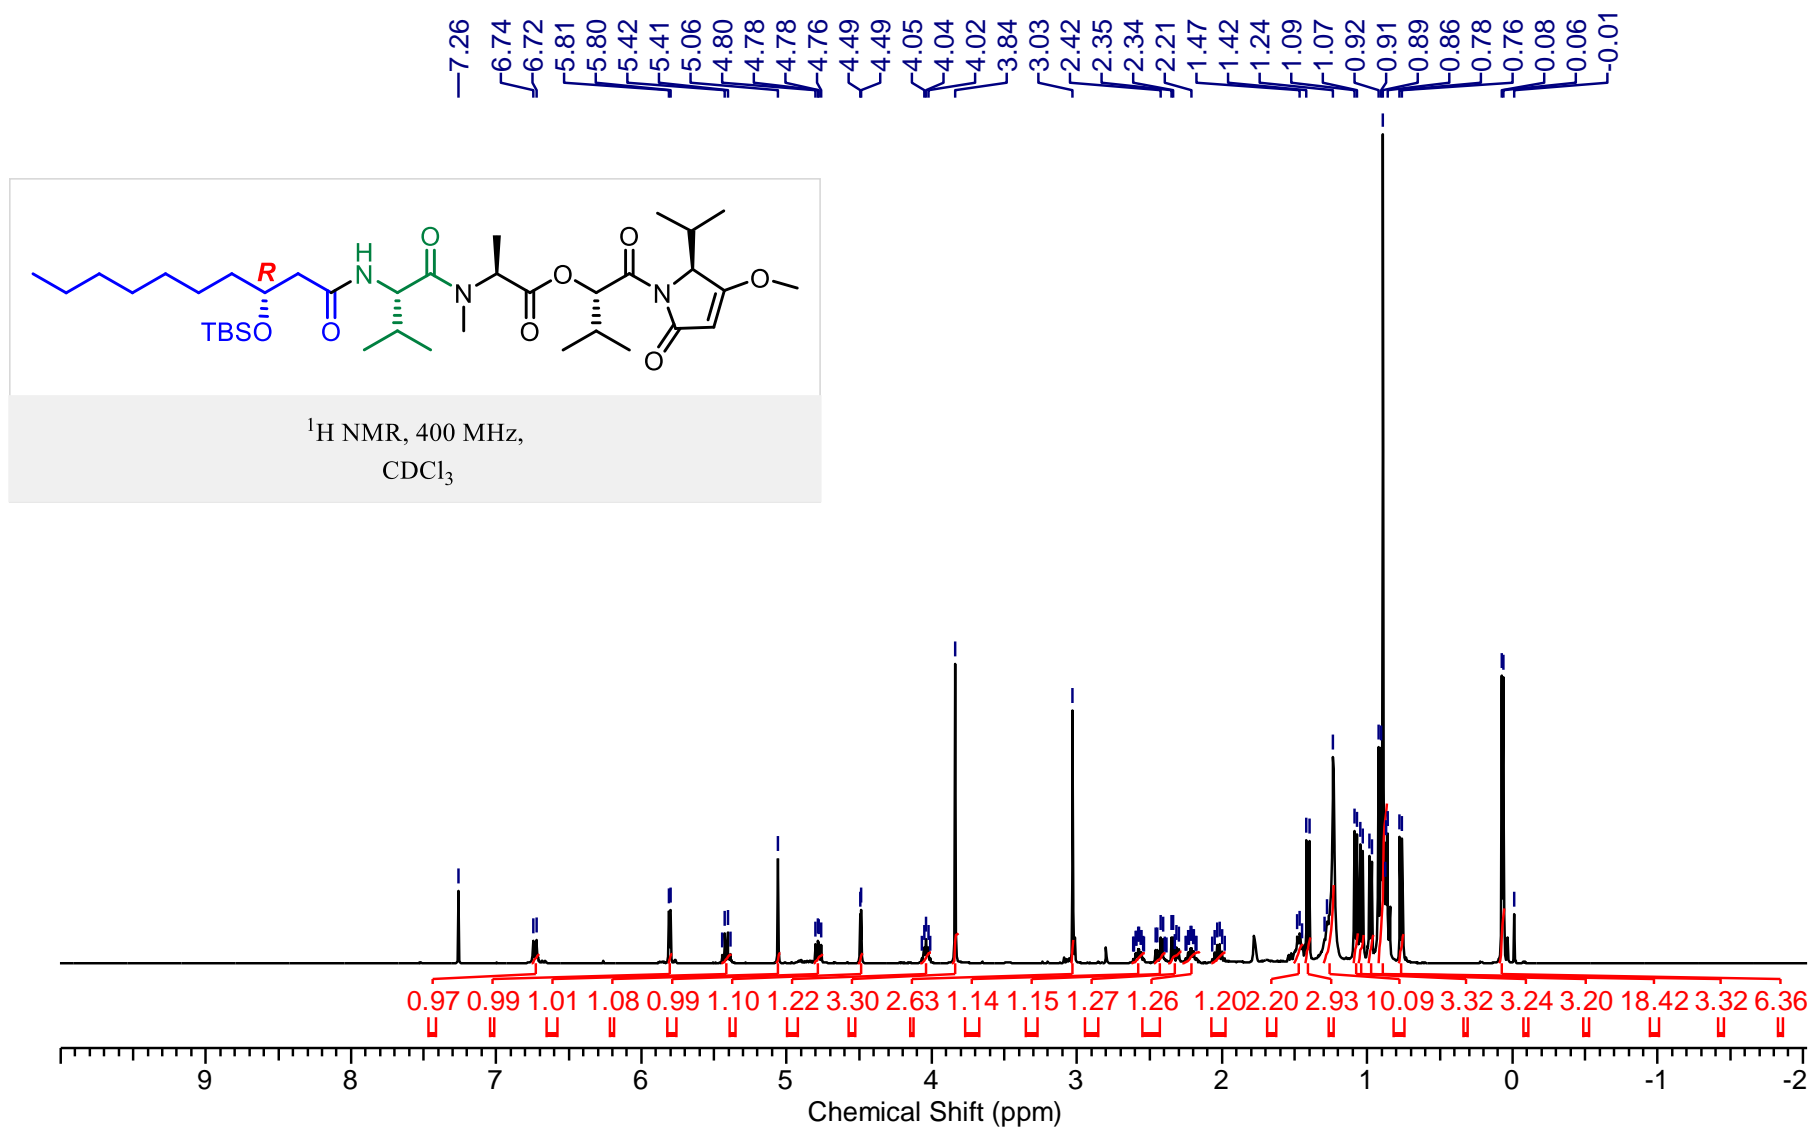

**(S)-1-((S)-2-Isopropyl-3-methoxy-5-oxo-2,5-dihydro-1H-pyrrol-1-yl)-3-methyl-1-oxobutan-2-yl N-(((R)-3-((tert-butyldimethylsilyl)oxy)decanoyl)-L-valyl)-N-methyl-L-alaninate(21'):**

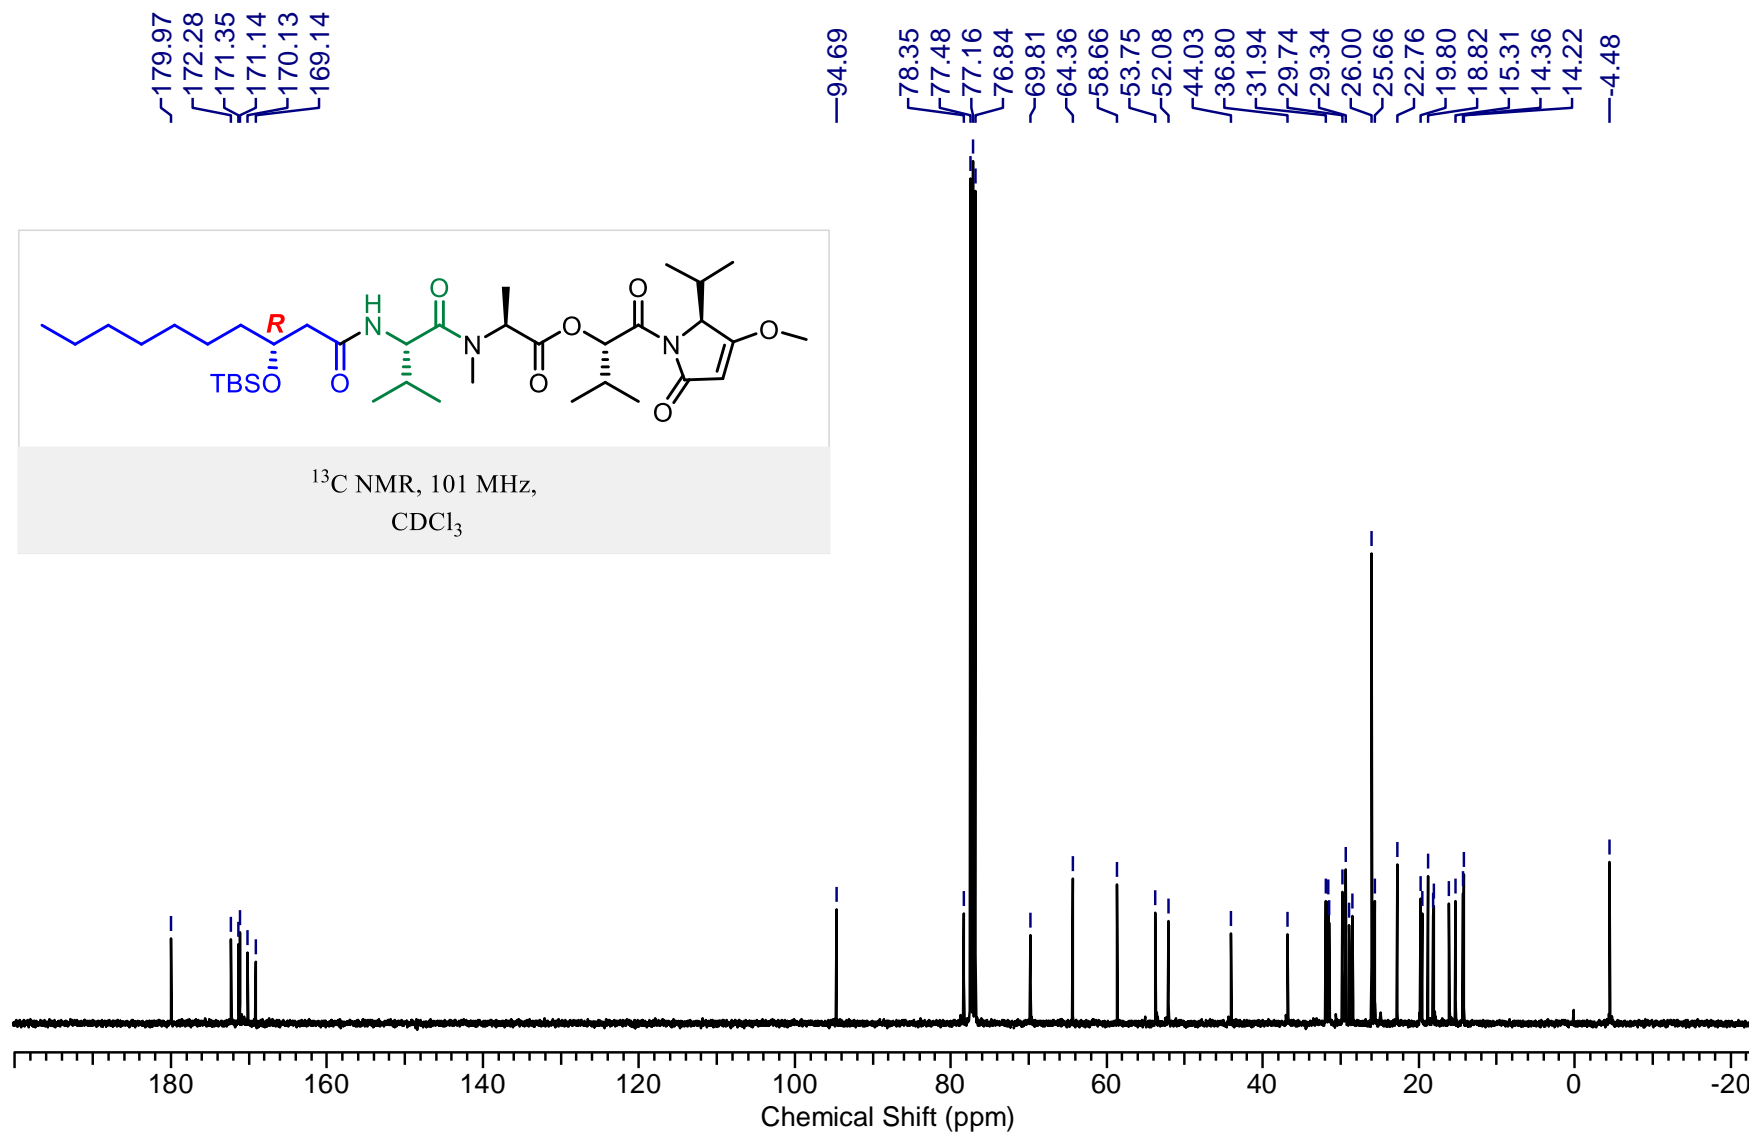

**(S)-1-(((S)-2-Isopropyl-3-methoxy-5-oxo-2,5-dihydro-1H-pyrrol-1-yl)-3-methyl-1-oxobutan-2-yl N-(((R)-3-hydroxydecanoyl)-L-valyl)-N-methyl-L-alaninate (5-*epi*-Kavaratamide A) (2):**

7.26 6.54 6.52 5.81 5.28 5.26 5.25 5.07 4.88 4.87 4.85 4.49 3.94 3.84 3.76 3.04 2.42 2.39 2.30 2.22 2.21 1.45 1.44 1.27 1.09 1.07 1.04 0.92 0.90 0.89 0.87 0.01

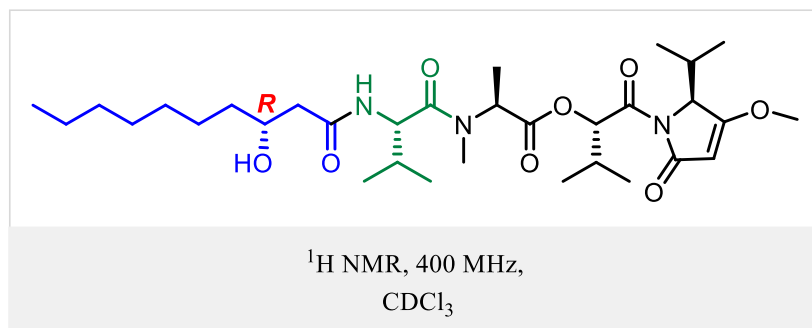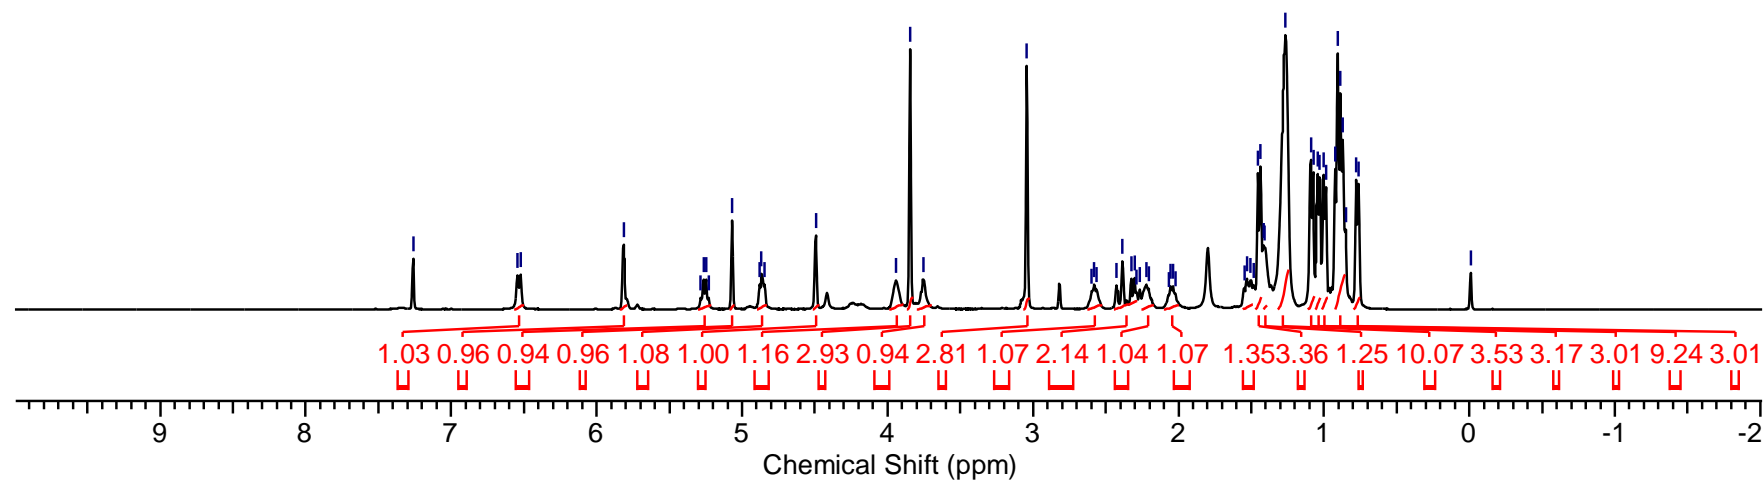

**(S)-1-((S)-2-Isopropyl-3-methoxy-5-oxo-2,5-dihydro-1H-pyrrol-1-yl)-3-methyl-1-oxobutan-2-yl N-(((R)-3-hydroxydecanoyl)-L-valyl)-N-methyl-L-alaninate (5-*epi*-Kavaratamide A) (2):**

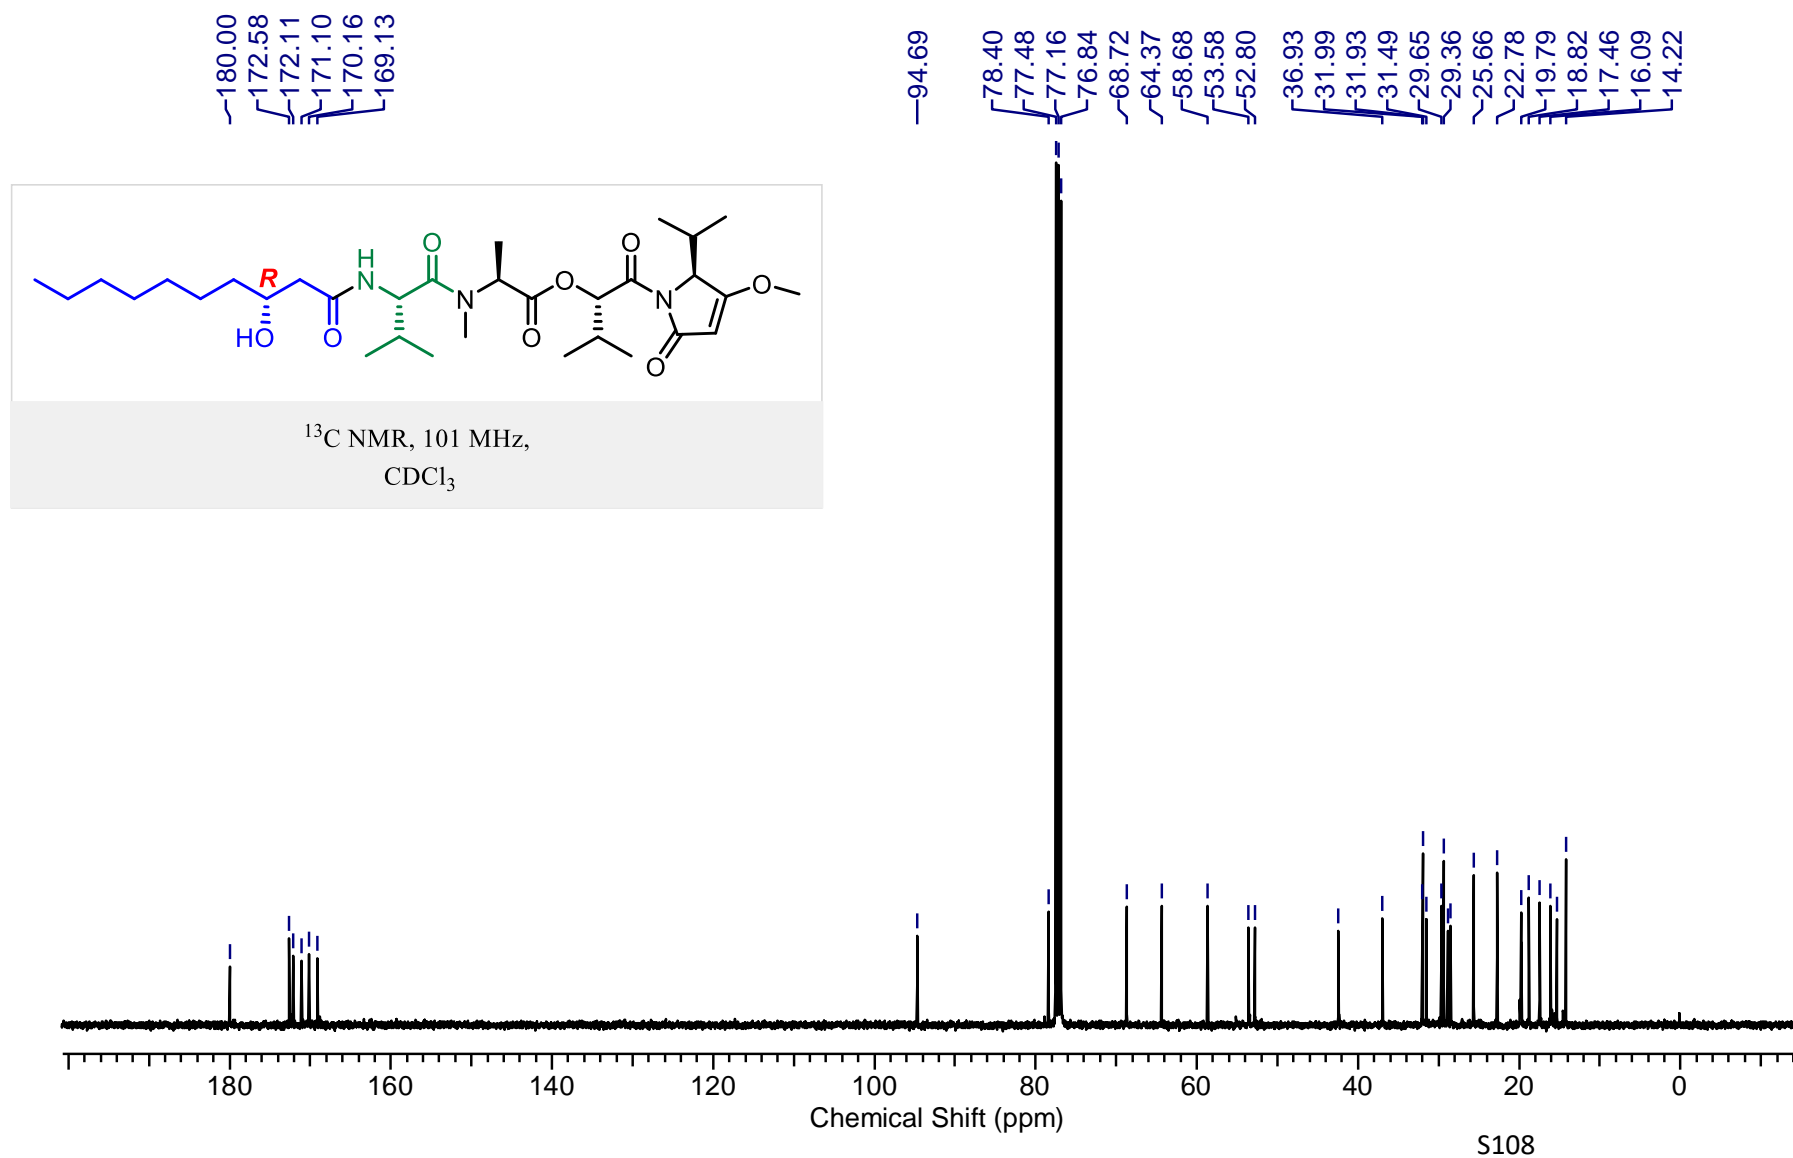

**(S)-1-(((S)-2-Isopropyl-3-methoxy-5-oxo-2,5-dihydro-1H-pyrrol-1-yl)-3-methyl-1-oxobutan-2-yl N-(((R)-3-hydroxydecanoyl)-L-valyl)-N-methyl-L-alaninate (5-*epi*-Kavaratamide A) (2):**

—94.55 —78.27 —68.59 —64.24 —58.56 —53.44 —52.66 —42.30 —31.86 —31.36 —25.52 —22.64 —19.66 —18.68 —17.33 —15.95 —15.17 —14.10 —14.09

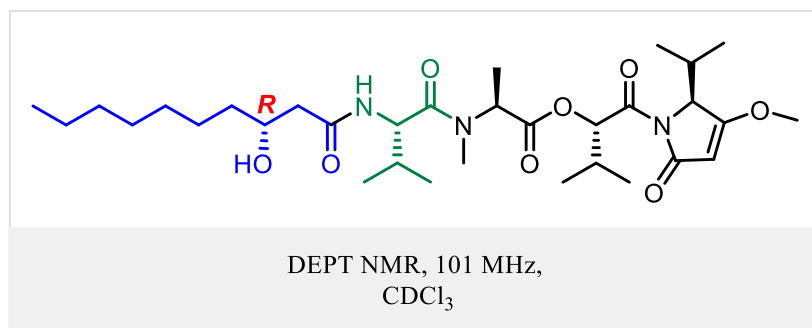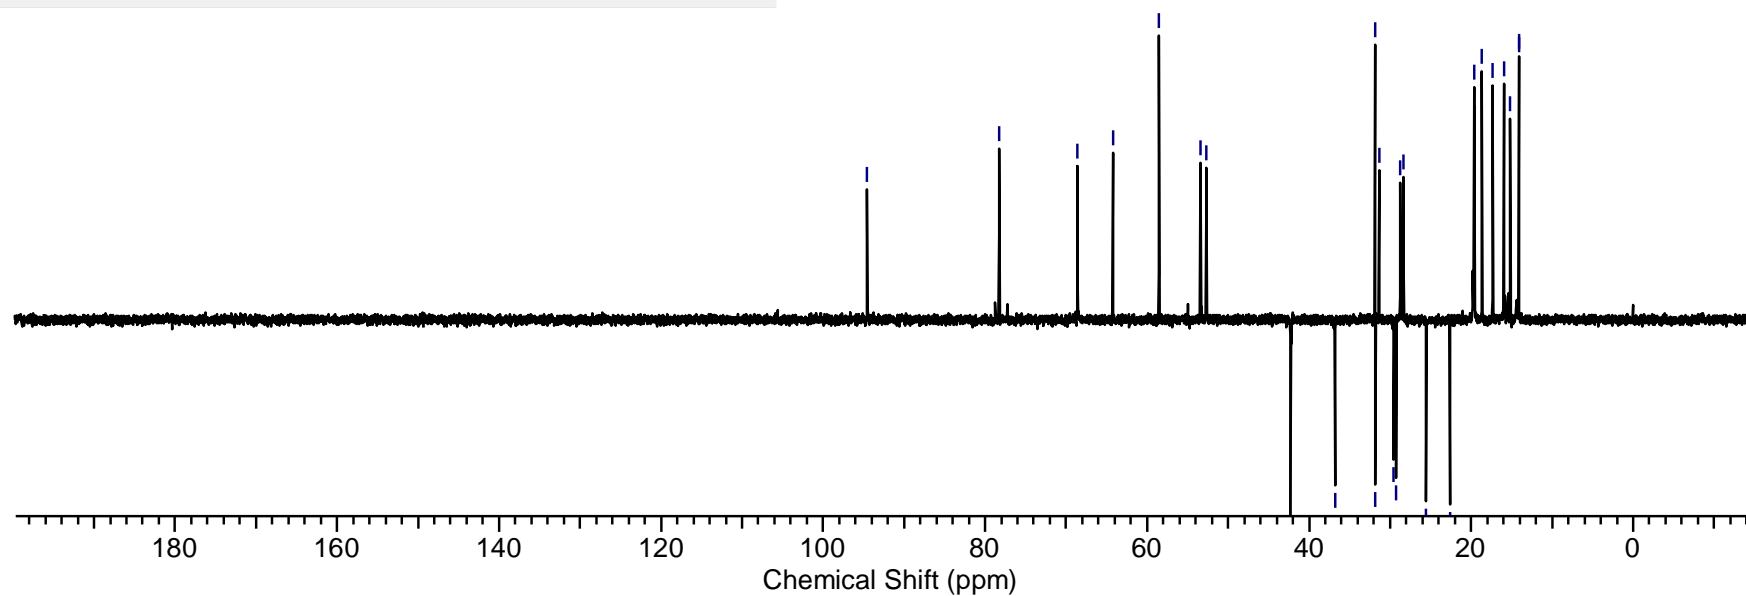

**THE END**
